# Supplementary material
Source: publisher site journal article supplement (https://www.dovepress.com/get_supplementary_file.php?f=441847.xlsx)
Supplement: Supplementary file 1 [file get_supplementary_file.php]

## Sheet: Table S1
Differential proteins Note: The list of differential proteins between the CT-EVs and RT-EVs comparison groups. In the 'Regulation' column, the UP and DOWN designations refer to the differential proteins filtered based on P-value ≤ 0.05 and |CT-EVs/RT-EVs| ≥ 1.5.
Protein IDs	Gene Name	Fasta headers	Number of proteins	Peptides	Razor + unique peptides	Unique peptides	Sequence coverage [%]	Mol. weight [kDa]	LFQ intensity CT-EVs1	LFQ intensity CT-EVs2	LFQ intensity CT-EVs3	LFQ intensity RT-EVs1	LFQ intensity RT-EVs2	LFQ intensity RT-EVs3	Average CT-EVs	Average RT-EVs	CT-EVs/RT-EVs	Regulation	P value
P01754;P06328;P01753	Ighv1-62-3; Ighv1-72	sp|P01754|HVM10_MOUSE Ig heavy chain V region 1-62-3 OS=Mus musculus OX=10090 GN=Ighv1-62-3 PE=4 SV=2;sp|P06328|HVM49_MOUSE Ig heavy chain V region 1-72 OS=Mus musculus OX=10090 GN=Ighv1-72 PE=1 SV=2;sp|P01753|HVM09_MOUSE Ig heavy chain V region 186-1 OS=M	3	4	3	2	47	12.921	5885600000	6041800000	5910900000	500890000	737210000	1818100000	5946100000	1.01873e+09	5.83676	UP	0.000270497
O70570	Pigr	sp|O70570|PIGR_MOUSE Polymeric immunoglobulin receptor OS=Mus musculus OX=10090 GN=Pigr PE=1 SV=1	1	16	16	16	31.1	84.998	553180000	621440000	674600000	123310000	125850000	127370000	6.16407e+08	125510000	4.91122	UP	0.000152662
P01878		sp|P01878|IGHA_MOUSE Ig alpha chain C region OS=Mus musculus OX=10090 PE=1 SV=1	1	9	9	9	36.6	36.875	8079900000	8757600000	9551700000	2698100000	2199400000	2141500000	8796400000	2.34633e+09	3.749	UP	0.000150794
P82198	Tgfbi	sp|P82198|BGH3_MOUSE Transforming growth factor-beta-induced protein ig-h3 OS=Mus musculus OX=10090 GN=Tgfbi PE=1 SV=1	1	7	7	7	13.8	74.596	83253000	106500000	101290000	37267000	25599000	22101000	9.70143e+07	2.83223e+07	3.42537	UP	0.00121991
P01671;P01670;P01673		sp|P01671|KV3AJ_MOUSE Ig kappa chain V-III region PC 7175 OS=Mus musculus OX=10090 PE=1 SV=1;sp|P01670|KV3AI_MOUSE Ig kappa chain V-III region PC 6684 OS=Mus musculus OX=10090 PE=1 SV=1;sp|P01673|KV3AL_MOUSE Ig kappa chain V-III region PC 2485/PC 4039 OS=M	3	6	6	4	88.3	12.01	1202900000	755070000	778750000	246570000	223760000	418250000	912240000	2.96193e+08	3.07988	UP	0.0175227
P03976		sp|P03976|KV2A5_MOUSE Ig kappa chain V-II region 17S29.1 OS=Mus musculus OX=10090 PE=1 SV=1	1	2	2	2	31	12.39	1986200000		1795100000	491430000		809610000	1890650000	650520000	2.90637	UP	0.0216683
P01631		sp|P01631|KV2A7_MOUSE Ig kappa chain V-II region 26-10 OS=Mus musculus OX=10090 PE=1 SV=1	1	2	2	2	32.7	12.273	14759000000	14725000000	21840000000	4841800000	4180700000	10902000000	17108000000	6641500000	2.57592	UP	0.0304542
P01864;P01863;P01865		sp|P01864|GCAB_MOUSE Ig gamma-2A chain C region secreted form OS=Mus musculus OX=10090 PE=1 SV=1	3	4	4	4	14.9	36.595	6665200000	5404800000	5011700000	2481700000	2300900000	1916100000	5693900000	2232900000	2.55	UP	0.00275951
Q8CG14	C1sa	sp|Q8CG14|CS1A_MOUSE Complement C1s-A subcomponent OS=Mus musculus OX=10090 GN=C1sa PE=2 SV=2	1	7	7	5	18.5	76.857	45058000	30518000	25044000	11813000	13432000	16514000	33540000	1.39197e+07	2.40954	UP	0.0328617
P01749	Ighv1-61	sp|P01749|HVM05_MOUSE Ig heavy chain V region 3 OS=Mus musculus OX=10090 GN=Ighv1-61 PE=1 SV=1	1	4	3	3	49.6	13.016	178890000	233210000	212350000	68731000	80888000	112820000	208150000	8.74797e+07	2.37941	UP	0.00421653
P41317	Mbl2	sp|P41317|MBL2_MOUSE Mannose-binding protein C OS=Mus musculus OX=10090 GN=Mbl2 PE=1 SV=2	1	6	6	6	36.5	25.957	572550000	630090000	1021100000	279250000	371700000	348950000	7.41247e+08	333300000	2.22396	UP	0.0468529
P01867	Igh-3	sp|P01867|IGG2B_MOUSE Ig gamma-2B chain C region OS=Mus musculus OX=10090 GN=Igh-3 PE=1 SV=3	1	9	9	9	31.2	44.259	5445100000	4344400000	5264400000	2645500000	2337800000	2148100000	5.01797e+09	2.37713e+09	2.11093	UP	0.00204489
P04919	Slc4a1	sp|P04919|B3AT_MOUSE Band 3 anion transport protein OS=Mus musculus OX=10090 GN=Slc4a1 PE=1 SV=1	1	15	15	15	23.9	103.13	156390000	122720000	196650000	82758000	82080000	74903000	1.58587e+08	7.99137e+07	1.98447	UP	0.0216512
Q8CG16;Q8CFG9;Q3UZ09	C1ra; C1rb	sp|Q8CG16|C1RA_MOUSE Complement C1r-A subcomponent OS=Mus musculus OX=10090 GN=C1ra PE=1 SV=1;sp|Q8CFG9|C1RB_MOUSE Complement C1r-B subcomponent OS=Mus musculus OX=10090 GN=C1rb PE=2 SV=1	3	10	10	10	19.9	80.072	109130000	82921000	61915000	42606000	38779000	46829000	8.46553e+07	42738000	1.9808	UP	0.0389449
P01643		sp|P01643|KV5AA_MOUSE Ig kappa chain V-V region MOPC 173 OS=Mus musculus OX=10090 PE=1 SV=1	1	2	1	1	31.5	11.217	18249000	18710000		8372400	12283000	10047000	18479500	1.02341e+07	1.80567	UP	0.0112518
P98086	C1qa	sp|P98086|C1QA_MOUSE Complement C1q subcomponent subunit A OS=Mus musculus OX=10090 GN=C1qa PE=1 SV=2	1	8	8	8	29	25.974	2601500000	2739400000	3482100000	1738000000	1770500000	1638200000	2941000000	1.71557e+09	1.7143	UP	0.0113828
P98064	Masp1	sp|P98064|MASP1_MOUSE Mannan-binding lectin serine protease 1 OS=Mus musculus OX=10090 GN=Masp1 PE=1 SV=2	1	16	16	16	27	79.967	351860000	377430000	351350000	212830000	205190000	212420000	3.60213e+08	2.10147e+08	1.7141	UP	7.44716e-05
Q91WP0	Masp2	sp|Q91WP0|MASP2_MOUSE Mannan-binding lectin serine protease 2 OS=Mus musculus OX=10090 GN=Masp2 PE=1 SV=1	1	17	17	17	36.2	75.516	160030000	138960000	138840000	95957000	79417000	87036000	1.45943e+08	87470000	1.6685	UP	0.00235211
P01029;CON__ENSEMBL:ENSBTAP00000007350;CON__P01030	C4b	sp|P01029|CO4B_MOUSE Complement C4-B OS=Mus musculus OX=10090 GN=C4b PE=1 SV=3	3	62	62	62	41.6	192.91	1508400000	1347900000	1644800000	952410000	1047500000	971520000	1.50037e+09	9.90477e+08	1.51479	UP	0.00489966
Q9R098;CON__ENSEMBL:ENSBTAP00000023055	Hgfac	sp|Q9R098|HGFA_MOUSE Hepatocyte growth factor activator OS=Mus musculus OX=10090 GN=Hgfac PE=1 SV=1	2	5	5	5	12.3	70.567	40073000	33807000	32828000	63154000	52797000	46844000	3.55693e+07	54265000	0.655475	DOWN	0.0239664
P14602	Hspb1	sp|P14602|HSPB1_MOUSE Heat shock protein beta-1 OS=Mus musculus OX=10090 GN=Hspb1 PE=1 SV=3	1	3	3	3	22	23.014	11056000	10727000	13181000	16646000	18379000	18571000	1.16547e+07	1.78653e+07	0.652362	DOWN	0.00320985
Q8BHN3	Ganab	sp|Q8BHN3|GANAB_MOUSE Neutral alpha-glucosidase AB OS=Mus musculus OX=10090 GN=Ganab PE=1 SV=1	1	4	4	4	3.7	106.91	7319400		6852500	10611000	9730900	12360000	7085950	1.09006e+07	0.650049	DOWN	0.0327237
P80317;Q61390	Cct6a	sp|P80317|TCPZ_MOUSE T-complex protein 1 subunit zeta OS=Mus musculus OX=10090 GN=Cct6a PE=1 SV=3	2	10	10	10	23	58.004	136050000	101750000	171570000	210100000	248220000	189420000	1.36457e+08	2.15913e+08	0.631997	DOWN	0.0400567
Q61805	Lbp	sp|Q61805|LBP_MOUSE Lipopolysaccharide-binding protein OS=Mus musculus OX=10090 GN=Lbp PE=1 SV=2	1	4	4	4	10.4	53.055	22726000	20960000	15470000	31149000	31340000	32716000	1.97187e+07	31735000	0.621354	DOWN	0.00582631
Q04857	Col6a1	sp|Q04857|CO6A1_MOUSE Collagen alpha-1(VI) chain OS=Mus musculus OX=10090 GN=Col6a1 PE=1 SV=1	1	6	6	6	7.8	108.49	10698000	16486000	16002000	24967000	23954000	20779000	1.43953e+07	2.32333e+07	0.619598	DOWN	0.0169421
A6X935;CON__Q3T052	Itih4	sp|A6X935|ITIH4_MOUSE Inter alpha-trypsin inhibitor, heavy chain 4 OS=Mus musculus OX=10090 GN=Itih4 PE=1 SV=2	2	27	27	27	40.2	104.66	293340000	250950000	177460000	396960000	402970000	378530000	2.40583e+08	392820000	0.612452	DOWN	0.0117386
A2BIM8;P02762;P04938	Mup18; Mup6; Mu	sp|A2BIM8|MUP18_MOUSE Major urinary protein 18 OS=Mus musculus OX=10090 GN=Mup18 PE=3 SV=1;sp|P02762|MUP6_MOUSE Major urinary protein 6 OS=Mus musculus OX=10090 GN=Mup6 PE=1 SV=2;sp|P04938|MUP11_MOUSE Major urinary protein 11 OS=Mus musculus OX=10090 GN=Mu	3	14	14	0	69.6	20.762	974150000	636960000	547830000	1228000000	1118100000	1219200000	7.19647e+08	1.18843e+09	0.605542	DOWN	0.0252453
P42932	Cct8	sp|P42932|TCPQ_MOUSE T-complex protein 1 subunit theta OS=Mus musculus OX=10090 GN=Cct8 PE=1 SV=3	1	20	20	20	39.4	59.555	31062000	23170000	43130000	60622000	56427000	45253000	32454000	5.41007e+07	0.599882	DOWN	0.042974
P84750		sp|P84750|KVM5_MOUSE Ig kappa chain V region Mem5 (Fragment) OS=Mus musculus OX=10090 PE=1 SV=1	1	2	2	2	15.7	13.251	28869000	27884000	30226000	48829000	50833000	47654000	28993000	4.91053e+07	0.590425	DOWN	6.27308e-05
P80315	Cct4	sp|P80315|TCPD_MOUSE T-complex protein 1 subunit delta OS=Mus musculus OX=10090 GN=Cct4 PE=1 SV=3	1	9	9	9	18.2	58.066	24293000	19494000	37356000	46921000	47277000	43627000	2.70477e+07	4.59417e+07	0.588739	DOWN	0.0258389
A2AN08	Ubr4	sp|A2AN08|UBR4_MOUSE E3 ubiquitin-protein ligase UBR4 OS=Mus musculus OX=10090 GN=Ubr4 PE=1 SV=1	1	16	16	16	4.4	572.28	13114000	11008000	16557000	25820000	25206000	19222000	1.35597e+07	23416000	0.579077	DOWN	0.0205896
B5X0G2	Mup17	sp|B5X0G2|MUP17_MOUSE Major urinary protein 17 OS=Mus musculus OX=10090 GN=Mup17 PE=2 SV=2	1	13	3	3	70	20.638	112080000	73936000	96609000	149280000	169680000	170120000	9.42083e+07	1.63027e+08	0.577871	DOWN	0.00617452
P05064	Aldoa	sp|P05064|ALDOA_MOUSE Fructose-bisphosphate aldolase A OS=Mus musculus OX=10090 GN=Aldoa PE=1 SV=2	1	11	11	11	39.8	39.355	38147000	30761000	27781000	59056000	58916000	52917000	3.22297e+07	56963000	0.5658	DOWN	0.00256805
Q9Z2W0	Dnpep	sp|Q9Z2W0|DNPEP_MOUSE Aspartyl aminopeptidase OS=Mus musculus OX=10090 GN=Dnpep PE=1 SV=2	1	16	16	16	42.1	52.206	133890000	117470000	242520000	284550000	293920000	300980000	1.64627e+08	293150000	0.561578	DOWN	0.0313171
P23927	Cryab	sp|P23927|CRYAB_MOUSE Alpha-crystallin B chain OS=Mus musculus OX=10090 GN=Cryab PE=1 SV=2	1	5	5	5	30.9	20.069	80945000	41120000	99858000	139160000	138590000	125680000	7.39743e+07	1.34477e+08	0.55009	DOWN	0.0275985
Q8R0Y6	Aldh1l1	sp|Q8R0Y6|AL1L1_MOUSE Cytosolic 10-formyltetrahydrofolate dehydrogenase OS=Mus musculus OX=10090 GN=Aldh1l1 PE=1 SV=1	1	18	18	18	25.7	98.708	63665000	35327000	29995000	79381000	88206000	70013000	4.29957e+07	79200000	0.542875	DOWN	0.0363689
P80313	Cct7	sp|P80313|TCPH_MOUSE T-complex protein 1 subunit eta OS=Mus musculus OX=10090 GN=Cct7 PE=1 SV=1	1	6	6	6	13.4	59.652	34887000	36841000	40823000	64510000	81075000	63367000	37517000	6.96507e+07	0.538645	DOWN	0.00580178
P11589;P11588;P11591	Mup2; Mup1	sp|P11589|MUP2_MOUSE Major urinary protein 2 OS=Mus musculus OX=10090 GN=Mup2 PE=1 SV=1;sp|P11588|MUP1_MOUSE Major urinary protein 1 OS=Mus musculus OX=10090 GN=Mup1 PE=1 SV=1	3	14	1	1	68.3	20.663	20506000		22674000	38138000	42404000	40894000	21590000	4.04787e+07	0.533367	DOWN	0.00185814
P68134;P68033;P62737;P63268	Acta1; Actc1	sp|P68134|ACTS_MOUSE Actin, alpha skeletal muscle OS=Mus musculus OX=10090 GN=Acta1 PE=1 SV=1;sp|P68033|ACTC_MOUSE Actin, alpha cardiac muscle 1 OS=Mus musculus OX=10090 GN=Actc1 PE=1 SV=1;sp|P62737|ACTA_MOUSE Actin, aortic smooth muscle OS=Mus musculus OX	4	13	5	5	46.2	42.051	18438000	21554000	19540000	44039000	27533000	40167000	19844000	3.72463e+07	0.532777	DOWN	0.0264186
P80318	Cct3	sp|P80318|TCPG_MOUSE T-complex protein 1 subunit gamma OS=Mus musculus OX=10090 GN=Cct3 PE=1 SV=1	1	21	21	21	43.3	60.629	27254000	19704000	42376000	60228000	59161000	49530000	29778000	5.63063e+07	0.528857	DOWN	0.0239072
P04939;P11590	Mup3	sp|P04939|MUP3_MOUSE Major urinary protein 3 OS=Mus musculus OX=10090 GN=Mup3 PE=1 SV=1	2	5	2	2	25	21.464		110140000	103980000	214080000		204270000	107060000	209175000	0.51182	DOWN	0.00320158
Q64514	Tpp2	sp|Q64514|TPP2_MOUSE Tripeptidyl-peptidase 2 OS=Mus musculus OX=10090 GN=Tpp2 PE=1 SV=3	1	25	25	25	26.6	139.88	68828000	84882000	127570000	196530000	195880000	166780000	93760000	1.86397e+08	0.503013	DOWN	0.00994272
P60710;P63260;Q8BFZ3	Actb; Actg1	sp|P60710|ACTB_MOUSE Actin, cytoplasmic 1 OS=Mus musculus OX=10090 GN=Actb PE=1 SV=1;sp|P63260|ACTG_MOUSE Actin, cytoplasmic 2 OS=Mus musculus OX=10090 GN=Actg1 PE=1 SV=1	3	14	14	6	45.9	41.736	103850000	119730000	146770000	301270000	215180000	252880000	123450000	2.56443e+08	0.481393	DOWN	0.00884817
P29788;Q8BP99	Vtn	sp|P29788|VTNC_MOUSE Vitronectin OS=Mus musculus OX=10090 GN=Vtn PE=1 SV=2	2	11	11	11	35.4	54.848	243430000	232580000	269600000	596650000	465550000	515830000	2.48537e+08	526010000	0.472494	DOWN	0.00221216
Q91WP6;Q5I2A0	Serpina3n	sp|Q91WP6|SPA3N_MOUSE Serine protease inhibitor A3N OS=Mus musculus OX=10090 GN=Serpina3n PE=1 SV=1	2	11	8	8	25.8	46.717	110990000	90208000	70723000	177580000	213970000	191950000	9.06403e+07	194500000	0.466017	DOWN	0.00272068
O55143;Q8R429;Q64518	Atp2a2	sp|O55143|AT2A2_MOUSE Sarcoplasmic/endoplasmic reticulum calcium ATPase 2 OS=Mus musculus OX=10090 GN=Atp2a2 PE=1 SV=2	3	9	9	9	11.2	114.86	10202000	9859900	24546000	28915000	31564000	35381000	14869300	3.19533e+07	0.465344	DOWN	0.0301759
P29391;P49945	Ftl1; Ftl2	sp|P29391|FRIL1_MOUSE Ferritin light chain 1 OS=Mus musculus OX=10090 GN=Ftl1 PE=1 SV=2;sp|P49945|FRIL2_MOUSE Ferritin light chain 2 OS=Mus musculus OX=10090 GN=Ftl2 PE=3 SV=2	2	8	8	8	52.5	20.802	310760000	213680000	243580000	587680000	569000000	511660000	2.56007e+08	5.56113e+08	0.46035	DOWN	0.00121823
Q8BMF4	Dlat	sp|Q8BMF4|ODP2_MOUSE Dihydrolipoyllysine-residue acetyltransferase component of pyruvate dehydrogenase complex, mitochondrial OS=Mus musculus OX=10090 GN=Dlat PE=1 SV=2	1	2	2	2	5.5	67.941	3205700	3492800	5862200	9342900	8657000	9321300	4186900	9.10707e+06	0.459742	DOWN	0.00484392
P09528	Fth1	sp|P09528|FRIH_MOUSE Ferritin heavy chain OS=Mus musculus OX=10090 GN=Fth1 PE=1 SV=2	1	12	12	12	68.1	21.066	103500000	80609000	85533000	182940000	204840000	207080000	8.98807e+07	1.98287e+08	0.453286	DOWN	0.000474476
P68368	Tuba4a	sp|P68368|TBA4A_MOUSE Tubulin alpha-4A chain OS=Mus musculus OX=10090 GN=Tuba4a PE=1 SV=1	1	8	8	1	26.8	49.924	10905000	15645000	11260000	30173000	27649000	26867000	1.26033e+07	2.82297e+07	0.446457	DOWN	0.00101451
Q91YP3	Dera	sp|Q91YP3|DEOC_MOUSE Deoxyribose-phosphate aldolase OS=Mus musculus OX=10090 GN=Dera PE=1 SV=1	1	5	5	5	23.9	34.975	15893000	28975000	30415000	45458000	69131000	56425000	2.50943e+07	5.70047e+07	0.440215	DOWN	0.0180521
Q6P069	Sri	sp|Q6P069|SORCN_MOUSE Sorcin OS=Mus musculus OX=10090 GN=Sri PE=1 SV=1	1	4	4	4	26.8	21.627		5393900	7326100	10967000	15092000	17395000	6360000	1.44847e+07	0.439085	DOWN	0.049001
P01868;P01869	Ighg1; Ighg1	sp|P01868|IGHG1_MOUSE Ig gamma-1 chain C region secreted form OS=Mus musculus OX=10090 GN=Ighg1 PE=1 SV=1;sp|P01869|IGH1M_MOUSE Ig gamma-1 chain C region, membrane-bound form OS=Mus musculus OX=10090 GN=Ighg1 PE=1 SV=2	2	9	9	9	42.3	35.704	1663100000	786820000	674760000	2432700000	2287500000	2487600000	1041560000	2402600000	0.433514	DOWN	0.0128614
P40124	Cap1	sp|P40124|CAP1_MOUSE Adenylyl cyclase-associated protein 1 OS=Mus musculus OX=10090 GN=Cap1 PE=1 SV=4	1	4	4	4	13.5	51.564	8422100	14662000	9496700	34263000	24024000	18697000	1.08603e+07	2.56613e+07	0.423215	DOWN	0.0405012
Q9EQK5	Mvp	sp|Q9EQK5|MVP_MOUSE Major vault protein OS=Mus musculus OX=10090 GN=Mvp PE=1 SV=4	1	15	15	15	22.2	95.923	28395000	27533000	69110000	113140000	96396000	87909000	4.16793e+07	9.91483e+07	0.420374	DOWN	0.0210971
P11983	Tcp1	sp|P11983|TCPA_MOUSE T-complex protein 1 subunit alpha OS=Mus musculus OX=10090 GN=Tcp1 PE=1 SV=3	1	10	10	10	20.1	60.448	19145000	15307000	29587000	66284000	46993000	39440000	2.13463e+07	5.09057e+07	0.419331	DOWN	0.0310031
Q8K0D2	Habp2	sp|Q8K0D2|HABP2_MOUSE Hyaluronan-binding protein 2 OS=Mus musculus OX=10090 GN=Habp2 PE=1 SV=2	1	9	9	9	20.3	62.356	22849000	19095000	16254000	49715000	52585000	38188000	1.93993e+07	4.68293e+07	0.414256	DOWN	0.00462466
P99024	Tubb5	sp|P99024|TBB5_MOUSE Tubulin beta-5 chain OS=Mus musculus OX=10090 GN=Tubb5 PE=1 SV=1	1	6	6	2	19.8	49.67	7817600	7484800	10954000	23828000	23159000	16993000	8.75213e+06	2.13267e+07	0.410384	DOWN	0.00672847
Q61646	Hp	sp|Q61646|HPT_MOUSE Haptoglobin OS=Mus musculus OX=10090 GN=Hp PE=1 SV=1	1	20	20	20	54.2	38.752	1769500000	1007100000	790730000	2580500000	2983100000	3196600000	1189110000	2.92007e+09	0.40722	DOWN	0.00758916
P01678;P01677;P01676;P01675;P01679		sp|P01678|KV6A4_MOUSE Ig kappa chain V-VI region SAPC 10 OS=Mus musculus OX=10090 PE=1 SV=1;sp|P01677|KV6A3_MOUSE Ig kappa chain V-VI region TEPC 601/TEPC 191 OS=Mus musculus OX=10090 PE=1 SV=1;sp|P01676|KV6A2_MOUSE Ig kappa chain V-VI region XRPC 24 OS=Mu	5	4	4	4	48.6	11.554	170230000	168080000	140630000	321860000	396310000	463140000	1.59647e+08	393770000	0.405431	DOWN	0.00503283
Q5FW60	Mup20	sp|Q5FW60|MUP20_MOUSE Major urinary protein 20 OS=Mus musculus OX=10090 GN=Mup20 PE=1 SV=1	1	7	7	4	45.9	20.93	92793000	49075000	33284000		139790000	155560000	58384000	147675000	0.395355	DOWN	0.0327811
Q91Y97	Aldob	sp|Q91Y97|ALDOB_MOUSE Fructose-bisphosphate aldolase B OS=Mus musculus OX=10090 GN=Aldob PE=1 SV=3	1	7	7	7	22	39.507	13727000	13903000	10857000	34938000	33948000	28959000	12829000	32615000	0.393347	DOWN	0.000703705
P39876	Timp3	sp|P39876|TIMP3_MOUSE Metalloproteinase inhibitor 3 OS=Mus musculus OX=10090 GN=Timp3 PE=1 SV=1	1	6	6	6	31.8	24.182	73559000	31073000	54414000	133370000	136730000	147630000	5.30153e+07	1.39243e+08	0.380739	DOWN	0.00269346
P16858;Q64467	Gapdh	sp|P16858|G3P_MOUSE Glyceraldehyde-3-phosphate dehydrogenase OS=Mus musculus OX=10090 GN=Gapdh PE=1 SV=2	2	8	8	8	33	35.81	39525000	38304000	40045000	97658000	119260000	106170000	3.92913e+07	107696000	0.364836	DOWN	0.000409235
Q91ZJ5	Ugp2	sp|Q91ZJ5|UGPA_MOUSE UTP--glucose-1-phosphate uridylyltransferase OS=Mus musculus OX=10090 GN=Ugp2 PE=1 SV=3	1	4	4	4	9.4	56.979	13019000	14980000		37630000	39107000	41115000	13999500	39284000	0.356366	DOWN	0.000449876
O09173	Hgd	sp|O09173|HGD_MOUSE Homogentisate 1,2-dioxygenase OS=Mus musculus OX=10090 GN=Hgd PE=1 SV=2	1	4	4	4	13.7	49.959	6734000		6665100	20010000	20467000	17961000	6699550	1.94793e+07	0.343931	DOWN	0.00101883
Q9WUB3;Q8CI94	Pygm	sp|Q9WUB3|PYGM_MOUSE Glycogen phosphorylase, muscle form OS=Mus musculus OX=10090 GN=Pygm PE=1 SV=3	2	14	14	13	19.1	97.285	10253000	12238000	21016000	48372000	52276000	41433000	1.45023e+07	4.73603e+07	0.306213	DOWN	0.00200111
O35490;Q91WS4	Bhmt	sp|O35490|BHMT1_MOUSE Betaine--homocysteine S-methyltransferase 1 OS=Mus musculus OX=10090 GN=Bhmt PE=1 SV=1	2	9	9	9	35.4	45.02	15385000	7868000	4780700	37398000	49001000	49387000	9.34457e+06	45262000	0.206455	DOWN	0.00204779
P05366	Saa1	sp|P05366|SAA1_MOUSE Serum amyloid A-1 protein OS=Mus musculus OX=10090 GN=Saa1 PE=1 SV=2	1	4	4	3	37.7	13.77	30349000	19374000		163180000	88124000	122280000	24861500	124528000	0.199646	DOWN	0.0388897
Q9Z126	Pf4	sp|Q9Z126|PLF4_MOUSE Platelet factor 4 OS=Mus musculus OX=10090 GN=Pf4 PE=1 SV=1	1	2	2	2	20	11.243	523840000	582330000	596050000	1301800000	4102800000	4076900000	5.67407e+08	3160500000	0.179531	DOWN	0.0493452
Q8VDD5;Q61879;O08638;Q6URW6	Myh9	sp|Q8VDD5|MYH9_MOUSE Myosin-9 OS=Mus musculus OX=10090 GN=Myh9 PE=1 SV=4	4	42	42	42	26.1	226.37	30550000	33195000	47314000	221700000	215000000	182320000	3.70197e+07	206340000	0.179411	DOWN	0.000214882
P47857	Pfkm	sp|P47857|PFKAM_MOUSE ATP-dependent 6-phosphofructokinase, muscle type OS=Mus musculus OX=10090 GN=Pfkm PE=1 SV=3	1	8	8	8	15.9	85.268	4618600		3764100	26696000	31098000	33310000	4191350	30368000	0.138019	DOWN	0.00192531
Q91YI0	Asl	sp|Q91YI0|ARLY_MOUSE Argininosuccinate lyase OS=Mus musculus OX=10090 GN=Asl PE=1 SV=1	1	14	14	14	30.6	51.739	12999000	3396500		89446000	172480000	180130000	8197750	147352000	0.0556338	DOWN	0.03439
O09159	Man2b1	sp|O09159|MA2B1_MOUSE Lysosomal alpha-mannosidase OS=Mus musculus OX=10090 GN=Man2b1 PE=1 SV=4	1	11	11	11	15.5	114.65	44228000	25652000	116420000	20360000	17616000	17394000	62100000	1.84567e+07	3.36464	-	0.190258
P18572	Bsg	sp|P18572|BASI_MOUSE Basigin OS=Mus musculus OX=10090 GN=Bsg PE=1 SV=2	1	5	5	5	11.3	42.444	61235000	47918000	99194000		25958000	26385000	69449000	26171500	2.65361	-	0.117107
Q8CIZ8	Vwf	sp|Q8CIZ8|VWF_MOUSE von Willebrand factor OS=Mus musculus OX=10090 GN=Vwf PE=1 SV=2	1	40	40	40	17.9	309.27	52290000	121220000	124890000	52708000	42747000	40583000	9.94667e+07	45346000	2.1935	-	0.0863032
P97321	Fap	sp|P97321|SEPR_MOUSE Prolyl endopeptidase FAP OS=Mus musculus OX=10090 GN=Fap PE=1 SV=1	1	5	5	5	8.1	87.944	17674000	15987000	7307600	7586700	5455600		13656200	6521150	2.09414	-	0.189563
P01654;P01655;P01656		sp|P01654|KV3A1_MOUSE Ig kappa chain V-III region PC 2880/PC 1229 OS=Mus musculus OX=10090 PE=1 SV=1;sp|P01655|KV3A2_MOUSE Ig kappa chain V-III region PC 7132 OS=Mus musculus OX=10090 PE=1 SV=1;sp|P01656|KV3A3_MOUSE Ig kappa chain V-III region MOPC 70 OS=M	3	6	5	3	91	11.98	529510000	268200000	391410000	213030000	187400000	212290000	3.96373e+08	204240000	1.94072	-	0.0646669
P20152	Vim	sp|P20152|VIME_MOUSE Vimentin OS=Mus musculus OX=10090 GN=Vim PE=1 SV=3	1	5	5	4	12.2	53.687	32661000	20628000	42099000	18164000		14950000	31796000	16557000	1.9204	-	0.15685
P24270	Cat	sp|P24270|CATA_MOUSE Catalase OS=Mus musculus OX=10090 GN=Cat PE=1 SV=4	1	20	20	20	48.4	59.795	112720000	56913000	80609000	47056000	45073000	41860000	83414000	44663000	1.86763	-	0.0755042
Q8BH61	F13a1	sp|Q8BH61|F13A_MOUSE Coagulation factor XIII A chain OS=Mus musculus OX=10090 GN=F13a1 PE=1 SV=3	1	27	27	27	36.3	83.206	608980000	1832600000	1469700000	734460000	746970000	646240000	1303760000	7.09223e+08	1.83829	-	0.177945
Q9CQW3	Proz	sp|Q9CQW3|PROZ_MOUSE Vitamin K-dependent protein Z OS=Mus musculus OX=10090 GN=Proz PE=1 SV=1	1	5	5	5	18.8	44.304	133410000	58167000			46770000	59972000	95788500	53371000	1.79477	-	0.382403
P53986	Slc16a1	sp|P53986|MOT1_MOUSE Monocarboxylate transporter 1 OS=Mus musculus OX=10090 GN=Slc16a1 PE=1 SV=1	1	4	4	4	9.1	53.267	50770000	38544000	69851000	20524000	34235000	34416000	53055000	29725000	1.78486	-	0.0842231
Q9JLF6	Tgm1	sp|Q9JLF6|TGM1_MOUSE Protein-glutamine gamma-glutamyltransferase K OS=Mus musculus OX=10090 GN=Tgm1 PE=1 SV=2	1	2	2	2	3.1	89.825		4240400	10397000	4405100	3871700		7318700	4138400	1.76849	-	0.411544
Q07968;CON__Q2TBQ1	F13b	sp|Q07968|F13B_MOUSE Coagulation factor XIII B chain OS=Mus musculus OX=10090 GN=F13b PE=1 SV=2	2	27	27	27	49.8	76.195	491600000	1296800000	977090000	544680000	573750000	518160000	921830000	545530000	1.68979	-	0.184019
P28076	Psmb9	sp|P28076|PSB9_MOUSE Proteasome subunit beta type-9 OS=Mus musculus OX=10090 GN=Psmb9 PE=1 SV=1	1	2	2	2	14.2	23.396	84250000	109180000	95898000		37520000	77187000	9.64427e+07	57353500	1.68155	-	0.111136
Q3UQ28	Pxdn	sp|Q3UQ28|PXDN_MOUSE Peroxidasin homolog OS=Mus musculus OX=10090 GN=Pxdn PE=1 SV=2	1	4	4	4	3.7	165.1		14107000	7369600	6299900	6690100	6519500	10738300	6.50317e+06	1.65124	-	0.190794
P01665;P01666;P01669;P01668		sp|P01665|KV3AD_MOUSE Ig kappa chain V-III region PC 7043 OS=Mus musculus OX=10090 PE=1 SV=1;sp|P01666|KV3AE_MOUSE Ig kappa chain V-III region PC 7183 OS=Mus musculus OX=10090 PE=1 SV=1;sp|P01669|KV3AH_MOUSE Ig kappa chain V-III region PC 7769 OS=Mus muscu	4	5	4	1	91	12.002	1913000000	1440800000	1131000000	719620000	803390000	1212200000	1.49493e+09	9.11737e+08	1.63965	-	0.100016
Q9ES30	C1qtnf3	sp|Q9ES30|C1QT3_MOUSE Complement C1q tumor necrosis factor-related protein 3 OS=Mus musculus OX=10090 GN=C1qtnf3 PE=2 SV=1	1	3	3	3	11	26.828	204170000	103550000	180880000	108090000	100860000	92786000	1.62867e+08	1.00579e+08	1.6193	-	0.112607
P01642	Gm10881	sp|P01642|KV5A9_MOUSE Ig kappa chain V-V region L7 (Fragment) OS=Mus musculus OX=10090 GN=Gm10881 PE=1 SV=1	1	2	2	2	23.5	12.615	824130000	1171200000	744210000	356630000	602040000	755830000	913180000	571500000	1.59787	-	0.122898
Q00724	Rbp4	sp|Q00724|RET4_MOUSE Retinol-binding protein 4 OS=Mus musculus OX=10090 GN=Rbp4 PE=1 SV=2	1	5	5	5	25.4	23.206	90824000	65897000	58006000	34765000	47545000	53132000	7.15757e+07	4.51473e+07	1.58538	-	0.079223
E9PV24;CON__P02672	Fga	sp|E9PV24|FIBA_MOUSE Fibrinogen alpha chain OS=Mus musculus OX=10090 GN=Fga PE=1 SV=1	2	56	56	56	68.6	87.428	26991000000	49069000000	57106000000	28799000000	28253000000	29140000000	4.43887e+10	2.87307e+10	1.54499	-	0.157113
Q61171	Prdx2	sp|Q61171|PRDX2_MOUSE Peroxiredoxin-2 OS=Mus musculus OX=10090 GN=Prdx2 PE=1 SV=3	1	6	6	6	49	21.778	42275000	25461000	59885000	24861000	30112000	27670000	4.25403e+07	2.75477e+07	1.54424	-	0.210147
P18527		sp|P18527|HVM56_MOUSE Ig heavy chain V region 914 OS=Mus musculus OX=10090 PE=1 SV=1	1	3	2	2	47.4	10.661	22069000	39885000		20944000	21845000	18114000	30977000	20301000	1.52589	-	0.214251
Q08879;CON__ENSEMBL:ENSBTAP00000016046	Fbln1	sp|Q08879|FBLN1_MOUSE Fibulin-1 OS=Mus musculus OX=10090 GN=Fbln1 PE=1 SV=2	2	9	9	9	18.4	78.032	27582000	37578000	25757000	19633000	18089000	21953000	3.03057e+07	1.98917e+07	1.52354	-	0.053502
P49722	Psma2	sp|P49722|PSA2_MOUSE Proteasome subunit alpha type-2 OS=Mus musculus OX=10090 GN=Psma2 PE=1 SV=3	1	7	7	7	43.6	25.926	73921000	71254000	56397000	22322000	47837000	63194000	6.71907e+07	44451000	1.51157	-	0.157773
Q9D0I9	Rars1	sp|Q9D0I9|SYRC_MOUSE Arginine--tRNA ligase, cytoplasmic OS=Mus musculus OX=10090 GN=Rars1 PE=1 SV=2	1	3	3	3	5.9	75.673	2917800		10638000	5822700	4309100	3499500	6777900	4.54377e+06	1.49169	-	0.511569
Q9Z1T2;Q05895	Thbs4	sp|Q9Z1T2|TSP4_MOUSE Thrombospondin-4 OS=Mus musculus OX=10090 GN=Thbs4 PE=1 SV=1	2	8	8	7	11.8	106.37	31455000	27943000	48862000	30313000	23665000	18808000	3.60867e+07	24262000	1.48737	-	0.179485
Q02013	Aqp1	sp|Q02013|AQP1_MOUSE Aquaporin-1 OS=Mus musculus OX=10090 GN=Aqp1 PE=1 SV=3	1	3	3	3	13.4	28.793	39966000	26442000	54261000	21417000	32336000	28398000	40223000	2.73837e+07	1.46887	-	0.211588
P18528		sp|P18528|HVM57_MOUSE Ig heavy chain V region 6.96 OS=Mus musculus OX=10090 PE=4 SV=1	1	3	3	2	30.6	11.007	2966000000	4511700000	6484900000	3416900000	3416200000	2738100000	4654200000	3190400000	1.45881	-	0.233193
P11152	Lpl	sp|P11152|LIPL_MOUSE Lipoprotein lipase OS=Mus musculus OX=10090 GN=Lpl PE=1 SV=3	1	4	4	4	13.9	53.109	16766000	17586000	13071000	10162000	10274000	12247000	1.58077e+07	1.08943e+07	1.451	-	0.0335264
Q8K182	C8a	sp|Q8K182|CO8A_MOUSE Complement component C8 alpha chain OS=Mus musculus OX=10090 GN=C8a PE=1 SV=1	1	26	26	26	53.5	66.08	856500000	582280000	408760000	399570000	411480000	470690000	6.15847e+08	4.27247e+08	1.44143	-	0.226785
O08807	Prdx4	sp|O08807|PRDX4_MOUSE Peroxiredoxin-4 OS=Mus musculus OX=10090 GN=Prdx4 PE=1 SV=1	1	2	2	2	11.7	31.052	5914900	23890000	12224000	6955900	11245000	11057000	1.40096e+07	9.75263e+06	1.4365	-	0.478237
Q80YX1	Tnc	sp|Q80YX1|TENA_MOUSE Tenascin OS=Mus musculus OX=10090 GN=Tnc PE=1 SV=1	1	15	15	15	10.9	231.8	30118000	23457000	30568000	22191000	19910000	16589000	2.80477e+07	1.95633e+07	1.43369	-	0.0394436
Q8BH35	C8b	sp|Q8BH35|CO8B_MOUSE Complement component C8 beta chain OS=Mus musculus OX=10090 GN=C8b PE=1 SV=1	1	22	22	22	45.2	66.229	956860000	637000000	533840000	501540000	473990000	508750000	7.09233e+08	494760000	1.43349	-	0.16857
O35955	Psmb10	sp|O35955|PSB10_MOUSE Proteasome subunit beta type-10 OS=Mus musculus OX=10090 GN=Psmb10 PE=1 SV=1	1	5	5	5	22.7	29.063	94535000	115720000	93678000	74019000	73148000	65177000	101311000	7.07813e+07	1.43132	-	0.016885
P14106	C1qb	sp|P14106|C1QB_MOUSE Complement C1q subcomponent subunit B OS=Mus musculus OX=10090 GN=C1qb PE=1 SV=2	1	8	8	8	40.3	26.717	6201500000	6703500000	9463400000	5233400000	5705900000	4967800000	7.45613e+09	5.30237e+09	1.40619	-	0.106335
Q61702;CON__Q0VCM5	Itih1	sp|Q61702|ITIH1_MOUSE Inter-alpha-trypsin inhibitor heavy chain H1 OS=Mus musculus OX=10090 GN=Itih1 PE=1 SV=2	2	21	21	21	33.4	101.07	399080000	293330000	255500000	257170000	209310000	211790000	315970000	226090000	1.39754	-	0.120593
Q02105	C1qc	sp|Q02105|C1QC_MOUSE Complement C1q subcomponent subunit C OS=Mus musculus OX=10090 GN=C1qc PE=1 SV=2	1	6	6	6	30.1	25.991	5877000000	7165900000	7445900000	4632700000	5117800000	5071400000	6829600000	4.94063e+09	1.38233	-	0.0204015
Q91V92	Acly	sp|Q91V92|ACLY_MOUSE ATP-citrate synthase OS=Mus musculus OX=10090 GN=Acly PE=1 SV=1	1	8	8	8	9.3	119.73	61701000	68112000	134170000	50677000	77216000	63427000	8.79943e+07	6.37733e+07	1.3798	-	0.377003
Q9Z1R3	Apom	sp|Q9Z1R3|APOM_MOUSE Apolipoprotein M OS=Mus musculus OX=10090 GN=Apom PE=1 SV=1	1	3	3	3	19.5	21.273	76539000	42270000	33776000	36529000	36399000	38003000	5.08617e+07	36977000	1.37549	-	0.348322
Q8VCG4	C8g	sp|Q8VCG4|CO8G_MOUSE Complement component C8 gamma chain OS=Mus musculus OX=10090 GN=C8g PE=1 SV=1	1	10	10	10	69.8	22.508	721650000	505200000	424090000	351560000	448630000	400650000	5.50313e+08	400280000	1.37482	-	0.182455
Q60997	Dmbt1	sp|Q60997|DMBT1_MOUSE Deleted in malignant brain tumors 1 protein OS=Mus musculus OX=10090 GN=Dmbt1 PE=1 SV=2	1	3	3	3	3.4	226.81	9379300	11460000	20617000		11976000	8388600	1.38188e+07	10182300	1.35714	-	0.49145
P01750		sp|P01750|HVM06_MOUSE Ig heavy chain V region 102 OS=Mus musculus OX=10090 PE=1 SV=1	1	4	2	2	40.2	12.866	463470000	335660000	936220000	419270000	512480000	379100000	578450000	436950000	1.32384	-	0.491087
Q60963	Pla2g7	sp|Q60963|PAFA_MOUSE Platelet-activating factor acetylhydrolase OS=Mus musculus OX=10090 GN=Pla2g7 PE=1 SV=2	1	2	2	2	6.4	49.258	8461000	7597000	6963200	4620200	6501000	6545200	7.67373e+06	5888800	1.30311	-	0.0809614
Q60994	Adipoq	sp|Q60994|ADIPO_MOUSE Adiponectin OS=Mus musculus OX=10090 GN=Adipoq PE=1 SV=2	1	4	4	4	21.1	26.809	442580000	236710000	376740000	355280000	274990000	182100000	352010000	270790000	1.29994	-	0.360191
P01804		sp|P01804|HVM35_MOUSE Ig heavy chain V-III region HPC76 (Fragment) OS=Mus musculus OX=10090 PE=4 SV=1	1	4	2	2	40.5	12.304	771430000	627370000		536100000	483120000	597290000	699400000	5.38837e+08	1.29798	-	0.100939
P04944;P04943;P04941;P04940		sp|P04944|KV6AA_MOUSE Ig kappa chain V-VI region NQ5-78.2.6 OS=Mus musculus OX=10090 PE=2 SV=1;sp|P04943|KV6A9_MOUSE Ig kappa chain V-VI region NQ6-8.3.1 OS=Mus musculus OX=10090 PE=2 SV=1;sp|P04941|KV6A7_MOUSE Ig kappa chain V-VI region NQ2-48.2.2 OS=Mus	4	2	2	2	26.2	11.391	366980000	280930000	517450000	281290000	202230000	416790000	3.88453e+08	3.00103e+08	1.2944	-	0.397213
O08538	Angpt1	sp|O08538|ANGP1_MOUSE Angiopoietin-1 OS=Mus musculus OX=10090 GN=Angpt1 PE=1 SV=2	1	16	16	16	34.3	57.518	124560000	119470000	219070000	115730000	113350000	130260000	1.54367e+08	119780000	1.28875	-	0.351322
Q60590;P07361;Q63805	Orm1	sp|Q60590|A1AG1_MOUSE Alpha-1-acid glycoprotein 1 OS=Mus musculus OX=10090 GN=Orm1 PE=1 SV=1	3	5	5	5	27.1	23.895	269070000	143150000	124060000	88164000	145220000	185570000	178760000	1.39651e+08	1.28005	-	0.505678
O88783;CON__Q28107	F5	sp|O88783|FA5_MOUSE Coagulation factor V OS=Mus musculus OX=10090 GN=F5 PE=1 SV=1	2	30	30	30	16.6	247.23	174440000	135380000	238090000	137820000	140430000	151220000	1.82637e+08	1.43157e+08	1.27578	-	0.26135
C0HKE6;Q8CGP5;C0HKE2;C0HKE3;C0HKE4;C0HKE5;C0HKE7;C0HKE9;C0HKE8;C0HKE1;Q8CGP6;Q8BFU2;Q8CGP7;Q8R1M2;Q64523;Q6GSS7;P27661;Q64522;Q3THW5;P0C0S6	H2ac13; Hist1h2af; H2ac6	sp|C0HKE6|H2A1I_MOUSE Histone H2A type 1-I OS=Mus musculus OX=10090 GN=H2ac13 PE=1 SV=1;sp|Q8CGP5|H2A1F_MOUSE Histone H2A type 1-F OS=Mus musculus OX=10090 GN=Hist1h2af PE=1 SV=3;sp|C0HKE2|H2A1C_MOUSE Histone H2A type 1-C OS=Mus musculus OX=10090 GN=H2ac6	20	3	3	3	25.4	14.135	30753000	40396000	97456000	48160000	40084000		5.62017e+07	44122000	1.27378	-	0.685337
P21180	C2	sp|P21180|CO2_MOUSE Complement C2 OS=Mus musculus OX=10090 GN=C2 PE=1 SV=2	1	10	10	10	16.1	84.741	59041000	49666000	44893000	41225000	41404000	38309000	51200000	4.03127e+07	1.27007	-	0.063522
Q8K0E8	Fgb	sp|Q8K0E8|FIBB_MOUSE Fibrinogen beta chain OS=Mus musculus OX=10090 GN=Fgb PE=1 SV=1	1	52	52	47	82.5	54.752	25896000000	48447000000	50228000000	36076000000	28295000000	33717000000	4.15237e+10	32696000000	1.26999	-	0.340323
P19096	Fasn	sp|P19096|FAS_MOUSE Fatty acid synthase OS=Mus musculus OX=10090 GN=Fasn PE=1 SV=2	1	44	44	44	23.7	272.43	45631000	52223000	55795000	45470000	41646000	35133000	5.12163e+07	4.07497e+07	1.25685	-	0.0690029
P33622	Apoc3	sp|P33622|APOC3_MOUSE Apolipoprotein C-III OS=Mus musculus OX=10090 GN=Apoc3 PE=1 SV=2	1	3	3	3	46.5	10.982	771440000	890470000	1110100000	588070000	787320000	831930000	9.24003e+08	7.35773e+08	1.25583	-	0.204606
Q9R0E2	Plod1	sp|Q9R0E2|PLOD1_MOUSE Procollagen-lysine,2-oxoglutarate 5-dioxygenase 1 OS=Mus musculus OX=10090 GN=Plod1 PE=1 SV=1	1	2	2	2	4.3	83.594	17411000	18557000	18244000	10514000	15198000	17648000	1.80707e+07	1.44533e+07	1.25028	-	0.163234
P18524		sp|P18524|HVM53_MOUSE Ig heavy chain V region RF OS=Mus musculus OX=10090 PE=1 SV=1	1	2	1	0	18.8	12.866	390040000	410710000	611780000	436530000	361700000	335770000	4.70843e+08	378000000	1.24562	-	0.293823
E9Q557	Dsp	sp|E9Q557|DESP_MOUSE Desmoplakin OS=Mus musculus OX=10090 GN=Dsp PE=1 SV=1	1	12	12	12	4.2	332.91	22593000	18936000	37624000	28248000	16426000	18885000	2.63843e+07	2.11863e+07	1.24535	-	0.484685
P01843		sp|P01843|LAC1_MOUSE Ig lambda-1 chain C region OS=Mus musculus OX=10090 PE=1 SV=1	1	4	4	4	61.9	11.575	1979200000	1636200000	1936400000	1378400000	1592000000	1513200000	1850600000	1.49453e+09	1.23825	-	0.0460738
P01837	Igkc	sp|P01837|IGKC_MOUSE Immunoglobulin kappa constant OS=Mus musculus OX=10090 GN=Igkc PE=1 SV=2	1	6	6	6	81.3	11.934	34861000000	34425000000	29293000000	22559000000	24889000000	32975000000	3.28597e+10	2.68077e+10	1.22576	-	0.170552
P42703	Lifr	sp|P42703|LIFR_MOUSE Leukemia inhibitory factor receptor OS=Mus musculus OX=10090 GN=Lifr PE=1 SV=1	1	14	14	14	16.5	122.57	145200000	105780000	79324000	104770000	88938000	77423000	1.10101e+08	90377000	1.21825	-	0.394944
Q8R4V5	Oit3	sp|Q8R4V5|OIT3_MOUSE Oncoprotein-induced transcript 3 protein OS=Mus musculus OX=10090 GN=Oit3 PE=2 SV=2	1	2	2	2	4.4	60.315	18279000	25024000	16751000	18149000	18031000	13250000	20018000	1.64767e+07	1.21493	-	0.304701
P28665	Mug1	sp|P28665|MUG1_MOUSE Murinoglobulin-1 OS=Mus musculus OX=10090 GN=Mug1 PE=1 SV=3	1	64	64	40	49.9	165.3	14503000000	12331000000	6995200000	9535800000	9080700000	9249800000	11276400000	9.28877e+09	1.21398	-	0.423984
Q8VCM7	Fgg	sp|Q8VCM7|FIBG_MOUSE Fibrinogen gamma chain OS=Mus musculus OX=10090 GN=Fgg PE=1 SV=1	1	34	34	34	78.2	49.391	36077000000	68575000000	75792000000	56934000000	46674000000	46236000000	60148000000	49948000000	1.20421	-	0.467054
Q8VCS0;CON__ENSEMBL:ENSBTAP00000016285	Pglyrp2	sp|Q8VCS0|PGRP2_MOUSE N-acetylmuramoyl-L-alanine amidase OS=Mus musculus OX=10090 GN=Pglyrp2 PE=1 SV=1	2	5	5	5	12.8	57.706	51561000	46545000	35001000	42413000	37423000	30946000	44369000	3.69273e+07	1.20152	-	0.277188
P19221;CON__P00735	F2	sp|P19221|THRB_MOUSE Prothrombin OS=Mus musculus OX=10090 GN=F2 PE=1 SV=1	2	27	27	27	46	70.268	1055500000	641930000	529430000	590970000	634430000	641010000	7.42287e+08	6.22137e+08	1.19312	-	0.496238
Q62351	Tfrc	sp|Q62351|TFR1_MOUSE Transferrin receptor protein 1 OS=Mus musculus OX=10090 GN=Tfrc PE=1 SV=1	1	17	17	17	27.3	85.73	65286000	57796000	178670000	89475000	83502000	81295000	100584000	8.47573e+07	1.18673	-	0.706909
Q06770	Serpina6	sp|Q06770|CBG_MOUSE Corticosteroid-binding globulin OS=Mus musculus OX=10090 GN=Serpina6 PE=1 SV=1	1	4	4	4	10.6	44.769	173410000	141520000	97940000	113400000	115160000	119740000	1.37623e+08	116100000	1.18539	-	0.38242
P26928	Mst1	sp|P26928|HGFL_MOUSE Hepatocyte growth factor-like protein OS=Mus musculus OX=10090 GN=Mst1 PE=2 SV=2	1	4	4	4	8.1	80.618	15657000	8839600	6685800	9322600	9216300	7794800	1.03941e+07	8777900	1.18413	-	0.588085
O70165	Fcn1	sp|O70165|FCN1_MOUSE Ficolin-1 OS=Mus musculus OX=10090 GN=Fcn1 PE=1 SV=1	1	8	8	8	27.5	36.298	297930000	280860000	296040000	271860000	241350000	231110000	291610000	2.48107e+08	1.17534	-	0.0313236
Q61703;CON__Q9TRI1	Itih2	sp|Q61703|ITIH2_MOUSE Inter-alpha-trypsin inhibitor heavy chain H2 OS=Mus musculus OX=10090 GN=Itih2 PE=1 SV=1	2	20	20	20	22.9	105.93	367420000	308400000	238720000	294830000	261370000	225810000	3.04847e+08	260670000	1.16947	-	0.354226
P03953	Cfd	sp|P03953|CFAD_MOUSE Complement factor D OS=Mus musculus OX=10090 GN=Cfd PE=1 SV=1	1	6	6	6	41.7	28.057	166180000	81399000	36838000	88917000	56332000	98023000	9.48057e+07	8.10907e+07	1.16913	-	0.748894
Q9R1P1	Psmb3	sp|Q9R1P1|PSB3_MOUSE Proteasome subunit beta type-3 OS=Mus musculus OX=10090 GN=Psmb3 PE=1 SV=1	1	9	9	9	37.1	22.965	163570000	156730000	167250000	79933000	183660000	154040000	1.62517e+08	139211000	1.16741	-	0.494008
Q80Y84	Kdm5b	sp|Q80Y84|KDM5B_MOUSE Lysine-specific demethylase 5B OS=Mus musculus OX=10090 GN=Kdm5b PE=1 SV=1	1	1	1	1	1.2	175.55	120020000	134890000	121680000		95400000	119870000	125530000	107635000	1.16626	-	0.200926
Q80YC5	F12	sp|Q80YC5|FA12_MOUSE Coagulation factor XII OS=Mus musculus OX=10090 GN=F12 PE=1 SV=2	1	11	11	11	26.1	65.701	165710000	151960000	100200000	98447000	125960000	135380000	139290000	119929000	1.16144	-	0.4439
Q01853	Vcp	sp|Q01853|TERA_MOUSE Transitional endoplasmic reticulum ATPase OS=Mus musculus OX=10090 GN=Vcp PE=1 SV=4	1	30	30	30	42.8	89.321	345280000	261780000	411030000	319350000	283570000	275890000	3.39363e+08	2.92937e+08	1.15849	-	0.362548
O35930	Gp1ba	sp|O35930|GP1BA_MOUSE Platelet glycoprotein Ib alpha chain OS=Mus musculus OX=10090 GN=Gp1ba PE=1 SV=2	1	3	3	3	4.8	80.054	17065000	15507000		16007000		12212000	16286000	14109500	1.15426	-	0.399842
P01644;P01645;P01646		sp|P01644|KV5AB_MOUSE Ig kappa chain V-V region HP R16.7 OS=Mus musculus OX=10090 PE=1 SV=1;sp|P01645|KV5AC_MOUSE Ig kappa chain V-V region HP 93G7 OS=Mus musculus OX=10090 PE=1 SV=1;sp|P01646|KV5AD_MOUSE Ig kappa chain V-V region HP 123E6 OS=Mus musculus	3	4	4	2	43.5	11.91	4210200000	3619100000	3197000000	3197300000	3073600000	3299800000	3.67543e+09	3.19023e+09	1.15209	-	0.182295
O70362	Gpld1	sp|O70362|PHLD_MOUSE Phosphatidylinositol-glycan-specific phospholipase D OS=Mus musculus OX=10090 GN=Gpld1 PE=1 SV=1	1	21	21	21	30.9	93.254	280940000	238580000	191150000	222840000	224750000	169450000	236890000	205680000	1.15174	-	0.379762
Q02257;Q02248	Jup	sp|Q02257|PLAK_MOUSE Junction plakoglobin OS=Mus musculus OX=10090 GN=Jup PE=1 SV=3	2	11	11	11	19.1	81.8	21351000	31045000	50273000	42960000	23353000	23117000	34223000	29810000	1.14804	-	0.702353
Q9Z2U1	Psma5	sp|Q9Z2U1|PSA5_MOUSE Proteasome subunit alpha type-5 OS=Mus musculus OX=10090 GN=Psma5 PE=1 SV=1	1	8	8	8	49.4	26.411	774300000	886840000	873030000	777570000	718530000	714430000	8.44723e+08	7.36843e+08	1.14641	-	0.0576748
Q60841	Reln	sp|Q60841|RELN_MOUSE Reelin OS=Mus musculus OX=10090 GN=Reln PE=1 SV=3	1	28	28	28	11	387.49	47521000	54421000	57740000	50208000	44156000	44981000	5.32273e+07	4.64483e+07	1.14595	-	0.129332
P11276	Fn1	sp|P11276|FINC_MOUSE Fibronectin OS=Mus musculus OX=10090 GN=Fn1 PE=1 SV=4	1	100	100	100	54.1	272.53	6241300000	6905500000	6773700000	6148300000	5713100000	5606000000	6.64017e+09	5.82247e+09	1.14044	-	0.035551
Q61508	Ecm1	sp|Q61508|ECM1_MOUSE Extracellular matrix protein 1 OS=Mus musculus OX=10090 GN=Ecm1 PE=1 SV=2	1	16	16	16	37.2	62.832	137630000	158760000	164180000	143870000	141740000	118470000	1.53523e+08	1.34693e+08	1.1398	-	0.176278
P21956	Mfge8	sp|P21956|MFGM_MOUSE Lactadherin OS=Mus musculus OX=10090 GN=Mfge8 PE=1 SV=3	1	6	6	6	19	51.24	18238000	15410000	28754000	14035000	22359000	18368000	2.08007e+07	18254000	1.13951	-	0.617983
Q9JHH6	Cpb2	sp|Q9JHH6|CBPB2_MOUSE Carboxypeptidase B2 OS=Mus musculus OX=10090 GN=Cpb2 PE=1 SV=1	1	7	7	7	19.7	48.87	64338000	47692000	39087000	41770000	43062000	47951000	5.03723e+07	44261000	1.13807	-	0.468941
P01639	Gm5571	sp|P01639|KV5A7_MOUSE Ig kappa chain V-V region MOPC 41 OS=Mus musculus OX=10090 GN=Gm5571 PE=1 SV=1	1	4	4	4	27.7	14.311	153140000	114800000	99213000	73136000	123080000	126510000	1.22384e+08	1.07575e+08	1.13766	-	0.563454
P06728	Apoa4	sp|P06728|APOA4_MOUSE Apolipoprotein A-IV OS=Mus musculus OX=10090 GN=Apoa4 PE=1 SV=3	1	25	25	25	65.3	45.029	630570000	632110000	526870000	503480000	592000000	478490000	5.96517e+08	5.24657e+08	1.13697	-	0.216212
P06683	C9	sp|P06683|CO9_MOUSE Complement component C9 OS=Mus musculus OX=10090 GN=C9 PE=1 SV=2	1	12	12	12	24.3	62.002	184120000	148600000	108050000	138210000	141930000	111290000	1.46923e+08	1.30477e+08	1.12605	-	0.530855
P06909	Cfh	sp|P06909|CFAH_MOUSE Complement factor H OS=Mus musculus OX=10090 GN=Cfh PE=1 SV=2	1	47	47	47	54.5	139.14	1378100000	790320000	749910000	951520000	793630000	881210000	9.72777e+08	8.75453e+08	1.11117	-	0.664316
Q8R121	Serpina10	sp|Q8R121|ZPI_MOUSE Protein Z-dependent protease inhibitor OS=Mus musculus OX=10090 GN=Serpina10 PE=1 SV=1	1	5	5	5	13.2	51.797	69005000	51850000	59292000	55812000		52563000	60049000	54187500	1.10817	-	0.435236
P01723;P01727;P01726		sp|P01723|LV1A_MOUSE Ig lambda-1 chain V region OS=Mus musculus OX=10090 PE=1 SV=2;sp|P01727|LV1E_MOUSE Ig lambda-1 chain V region S43 OS=Mus musculus OX=10090 PE=1 SV=1;sp|P01726|LV1D_MOUSE Ig lambda-1 chain V region H2020 OS=Mus musculus OX=10090 PE=1 SV	3	2	2	1	35.9	12.222	7756600000	4727600000	4638100000		4562000000	5748800000	5.70743e+09	5155400000	1.10708	-	0.718794
P01027	C3	sp|P01027|CO3_MOUSE Complement C3 OS=Mus musculus OX=10090 GN=C3 PE=1 SV=3	1	96	96	86	63.1	186.48	5589100000	4396900000	3497800000	4332900000	4001300000	3864500000	4494600000	4.06623e+09	1.10535	-	0.528528
Q02566;Q91Z83;P13542;Q5SX39;Q5SX40	Myh6; Myh7	sp|Q02566|MYH6_MOUSE Myosin-6 OS=Mus musculus OX=10090 GN=Myh6 PE=1 SV=2;sp|Q91Z83|MYH7_MOUSE Myosin-7 OS=Mus musculus OX=10090 GN=Myh7 PE=2 SV=1	5	22	22	14	15	223.56	21933000	23713000	30451000	34446000	11972000	22685000	2.53657e+07	2.30343e+07	1.10121	-	0.755465
P39039	Mbl1	sp|P39039|MBL1_MOUSE Mannose-binding protein A OS=Mus musculus OX=10090 GN=Mbl1 PE=1 SV=1	1	5	5	5	30.5	25.396	484030000	324370000	344170000	414420000	337890000	299180000	384190000	3.50497e+08	1.09613	-	0.607787
B2RPV6	Mmrn1	sp|B2RPV6|MMRN1_MOUSE Multimerin-1 OS=Mus musculus OX=10090 GN=Mmrn1 PE=1 SV=2	1	21	21	21	22.5	136.1	111180000	108340000	159470000	130020000	118370000	97443000	126330000	1.15278e+08	1.09588	-	0.59445
O88968	Tcn2	sp|O88968|TCO2_MOUSE Transcobalamin-2 OS=Mus musculus OX=10090 GN=Tcn2 PE=1 SV=1	1	4	4	4	13	47.585	31379000	18978000	18089000	20812000	22410000	19264000	2.28153e+07	2.08287e+07	1.09538	-	0.673967
P01592	Jchain	sp|P01592|IGJ_MOUSE Immunoglobulin J chain OS=Mus musculus OX=10090 GN=Jchain PE=1 SV=4	1	10	10	10	68.6	18.013	6931800000	9564100000	9156000000	8609800000	7638000000	7228500000	8.55063e+09	7.82543e+09	1.09267	-	0.472285
P70389	Igfals	sp|P70389|ALS_MOUSE Insulin-like growth factor-binding protein complex acid labile subunit OS=Mus musculus OX=10090 GN=Igfals PE=1 SV=1	1	14	14	14	28.5	66.959	129300000	88819000	64476000	85723000	79942000	93281000	9.41983e+07	8.63153e+07	1.09133	-	0.703806
Q9DBB9	Cpn2	sp|Q9DBB9|CPN2_MOUSE Carboxypeptidase N subunit 2 OS=Mus musculus OX=10090 GN=Cpn2 PE=1 SV=2	1	13	13	13	33.3	60.478	732230000	614650000	398190000	549350000	505440000	547610000	581690000	5.34133e+08	1.08904	-	0.655658
P29699	Ahsg	sp|P29699|FETUA_MOUSE Alpha-2-HS-glycoprotein OS=Mus musculus OX=10090 GN=Ahsg PE=1 SV=1	1	6	6	6	28.4	37.325	1037500000	1082300000	831990000	885070000	1016200000	813080000	983930000	9.04783e+08	1.08748	-	0.461765
Q91ZX7	Lrp1	sp|Q91ZX7|LRP1_MOUSE Prolow-density lipoprotein receptor-related protein 1 OS=Mus musculus OX=10090 GN=Lrp1 PE=1 SV=1	1	14	14	14	4.4	504.74	27418000	20462000	20768000	23963000	20284000	18972000	2.28827e+07	21073000	1.08588	-	0.54181
Q07456	Ambp	sp|Q07456|AMBP_MOUSE Protein AMBP OS=Mus musculus OX=10090 GN=Ambp PE=1 SV=2	1	10	10	10	31.5	39.029	554490000	339300000	301300000	418440000	385650000	304830000	3.98363e+08	369640000	1.07771	-	0.754493
P22599	Serpina1b	sp|P22599|A1AT2_MOUSE Alpha-1-antitrypsin 1-2 OS=Mus musculus OX=10090 GN=Serpina1b PE=1 SV=2	1	15	5	5	39.5	45.974	1290200000	1418500000	1205400000	1375500000	1203400000	1063900000	1304700000	1.21427e+09	1.07448	-	0.454716
P34928	Apoc1	sp|P34928|APOC1_MOUSE Apolipoprotein C-I OS=Mus musculus OX=10090 GN=Apoc1 PE=1 SV=1	1	3	3	3	22.7	9.6963	176720000	311310000	254690000	251300000	215810000	224510000	2.47573e+08	230540000	1.07388	-	0.695331
Q923D2	Blvrb	sp|Q923D2|BLVRB_MOUSE Flavin reductase (NADPH) OS=Mus musculus OX=10090 GN=Blvrb PE=1 SV=3	1	5	5	5	31.1	22.197	20845000	16831000	19775000	22635000	17780000	13219000	1.91503e+07	17878000	1.07117	-	0.690589
Q99K41	Emilin1	sp|Q99K41|EMIL1_MOUSE EMILIN-1 OS=Mus musculus OX=10090 GN=Emilin1 PE=1 SV=1	1	13	13	13	18	107.58	28317000	31043000	37010000	29025000	31990000	29910000	3.21233e+07	3.03083e+07	1.05988	-	0.540153
O88947	F10	sp|O88947|FA10_MOUSE Coagulation factor X OS=Mus musculus OX=10090 GN=F10 PE=1 SV=1	1	7	7	7	16.8	54.017	75969000	62094000	44842000	56471000	60352000	55814000	6.09683e+07	5.75457e+07	1.05948	-	0.726322
Q64726	Azgp1	sp|Q64726|ZA2G_MOUSE Zinc-alpha-2-glycoprotein OS=Mus musculus OX=10090 GN=Azgp1 PE=1 SV=2	1	10	10	10	43.3	35.332	183490000	123080000	84183000	100370000	127220000	141500000	130251000	123030000	1.05869	-	0.828895
P97298;CON__Q95121	Serpinf1	sp|P97298|PEDF_MOUSE Pigment epithelium-derived factor OS=Mus musculus OX=10090 GN=Serpinf1 PE=1 SV=2	2	7	7	7	20.4	46.233	68947000	56320000	50273000	58477000	53095000	55386000	5.85133e+07	5.56527e+07	1.0514	-	0.643135
P55065	Pltp	sp|P55065|PLTP_MOUSE Phospholipid transfer protein OS=Mus musculus OX=10090 GN=Pltp PE=1 SV=1	1	8	8	8	19.3	54.452	76324000	60025000	52917000	53836000	64240000	63296000	6.30887e+07	6.04573e+07	1.04352	-	0.749244
Q8BND5	Qsox1	sp|Q8BND5|QSOX1_MOUSE Sulfhydryl oxidase 1 OS=Mus musculus OX=10090 GN=Qsox1 PE=1 SV=1	1	15	15	15	27	82.784	262380000	219920000	172620000	231620000	217570000	178500000	2.18307e+08	209230000	1.04338	-	0.780182
P52480	Pkm	sp|P52480|KPYM_MOUSE Pyruvate kinase PKM OS=Mus musculus OX=10090 GN=Pkm PE=1 SV=4	1	11	11	10	29.9	57.844	76767000	96055000	77844000	86860000	75100000	78557000	8.35553e+07	8.01723e+07	1.0422	-	0.661412
Q9D8W5	Psmd12	sp|Q9D8W5|PSD12_MOUSE 26S proteasome non-ATPase regulatory subunit 12 OS=Mus musculus OX=10090 GN=Psmd12 PE=1 SV=4	1	6	6	6	15.4	52.895	8490800	14159000	14421000	9704900	12133000	13785000	1.23569e+07	11874300	1.04065	-	0.841927
P08226	Apoe	sp|P08226|APOE_MOUSE Apolipoprotein E OS=Mus musculus OX=10090 GN=Apoe PE=1 SV=2	1	17	17	17	49.2	35.866	1498900000	2086600000	1518200000	1584600000	1718500000	1629700000	1.70123e+09	1.64427e+09	1.03465	-	0.786543
A2AVA0	Svep1	sp|A2AVA0|SVEP1_MOUSE Sushi, von Willebrand factor type A, EGF and pentraxin domain-containing protein 1 OS=Mus musculus OX=10090 GN=Svep1 PE=1 SV=1	1	11	11	11	4.2	387.45	10074000	12985000	20532000	17729000	12978000	11503000	1.45303e+07	14070000	1.03272	-	0.90543
P28063	Psmb8	sp|P28063|PSB8_MOUSE Proteasome subunit beta type-8 OS=Mus musculus OX=10090 GN=Psmb8 PE=1 SV=2	1	8	8	8	38.8	30.26	102160000	119850000	139220000	96739000	133280000	120680000	120410000	1.169e+08	1.03003	-	0.828084
Q61176	Arg1	sp|Q61176|ARGI1_MOUSE Arginase-1 OS=Mus musculus OX=10090 GN=Arg1 PE=1 SV=1	1	3	3	3	15.2	34.807	18432000		22135000	17816000	21695000		20283500	19755500	1.02673	-	0.862091
P00687;CON__Q3MHH8	Amy1	sp|P00687|AMY1_MOUSE Alpha-amylase 1 OS=Mus musculus OX=10090 GN=Amy1 PE=1 SV=2	2	8	8	6	19.8	57.643	70255000	59618000	30791000	47537000	44224000	64886000	5.35547e+07	5.22157e+07	1.02564	-	0.925307
P10126;P62631	Eef1a1; Eef1a2	sp|P10126|EF1A1_MOUSE Elongation factor 1-alpha 1 OS=Mus musculus OX=10090 GN=Eef1a1 PE=1 SV=3;sp|P62631|EF1A2_MOUSE Elongation factor 1-alpha 2 OS=Mus musculus OX=10090 GN=Eef1a2 PE=1 SV=1	2	4	4	4	12.1	50.113	34740000	14087000	25219000	26513000	24071000	22271000	24682000	24285000	1.01635	-	0.951178
P01630		sp|P01630|KV2A6_MOUSE Ig kappa chain V-II region 7S34.1 OS=Mus musculus OX=10090 PE=1 SV=1	1	2	2	2	21.2	12.496	1231900000	1239200000	1344700000	1259500000	1455300000	1055000000	1.27193e+09	1256600000	1.0122	-	0.905412
Q9R1P3	Psmb2	sp|Q9R1P3|PSB2_MOUSE Proteasome subunit beta type-2 OS=Mus musculus OX=10090 GN=Psmb2 PE=1 SV=1	1	7	7	7	38.3	22.906	135520000	145400000	189540000	140310000	164650000	160480000	156820000	1.55147e+08	1.01079	-	0.931271
P54775	Psmc4	sp|P54775|PRS6B_MOUSE 26S proteasome regulatory subunit 6B OS=Mus musculus OX=10090 GN=Psmc4 PE=1 SV=2	1	7	7	7	18.2	47.408	14160000	21788000	17850000	17386000	18506000	17337000	1.79327e+07	17743000	1.01069	-	0.936456
P20918;CON__P06868	Plg	sp|P20918|PLMN_MOUSE Plasminogen OS=Mus musculus OX=10090 GN=Plg PE=1 SV=3	2	48	48	48	72.9	90.807	1768500000	1130200000	962310000	1127500000	1331600000	1369800000	1.287e+09	1276300000	1.00839	-	0.968756
P06151;P00342;P16125	Ldha; Ldhc	sp|P06151|LDHA_MOUSE L-lactate dehydrogenase A chain OS=Mus musculus OX=10090 GN=Ldha PE=1 SV=3;sp|P00342|LDHC_MOUSE L-lactate dehydrogenase C chain OS=Mus musculus OX=10090 GN=Ldhc PE=1 SV=2	3	4	4	4	12	36.498	20289000	15215000	42580000	24377000	23903000	29297000	26028000	25859000	1.00654	-	0.985228
Q61247	Serpinf2	sp|Q61247|A2AP_MOUSE Alpha-2-antiplasmin OS=Mus musculus OX=10090 GN=Serpinf2 PE=1 SV=1	1	12	12	12	30.5	54.971	645910000	517690000	384530000	547480000	483650000	507430000	5.16043e+08	5.12853e+08	1.00622	-	0.969228
Q03311	Bche	sp|Q03311|CHLE_MOUSE Cholinesterase OS=Mus musculus OX=10090 GN=Bche PE=1 SV=2	1	4	4	4	8	68.461	37819000	32239000	31999000	23624000	30720000	48008000	34019000	3.41173e+07	0.997118	-	0.990149
P70195	Psmb7	sp|P70195|PSB7_MOUSE Proteasome subunit beta type-7 OS=Mus musculus OX=10090 GN=Psmb7 PE=1 SV=1	1	5	5	5	14.8	29.891	54856000	53176000	57140000	54277000	57352000	54061000	5.50573e+07	55230000	0.996874	-	0.917461
P70274	Selenop	sp|P70274|SEPP1_MOUSE Selenoprotein P OS=Mus musculus OX=10090 GN=Selenop PE=1 SV=3	1	4	4	4	9.5	42.705	119140000	117800000	93320000	114650000	87553000	130280000	1.10087e+08	1.10828e+08	0.993314	-	0.963068
P01844	Iglc2	sp|P01844|LAC2_MOUSE Ig lambda-2 chain C region OS=Mus musculus OX=10090 GN=Iglc2 PE=1 SV=1	1	6	6	3	74	11.254	2223400000	1685300000	1984400000	2236300000	1829100000	1879300000	1.96437e+09	1.98157e+09	0.99132	-	0.936124
Q8BPB5	Efemp1	sp|Q8BPB5|FBLN3_MOUSE EGF-containing fibulin-like extracellular matrix protein 1 OS=Mus musculus OX=10090 GN=Efemp1 PE=1 SV=1	1	7	7	7	23.7	54.952	29650000	31772000	26048000	34497000	29437000	24406000	2.91567e+07	2.94467e+07	0.990152	-	0.935332
Q9QUM9	Psma6	sp|Q9QUM9|PSA6_MOUSE Proteasome subunit alpha type-6 OS=Mus musculus OX=10090 GN=Psma6 PE=1 SV=1	1	11	11	11	52.4	27.372	328100000	328680000	375840000	368830000	343630000	332120000	3.44207e+08	3.48193e+08	0.98855	-	0.845461
P09411	Pgk1	sp|P09411|PGK1_MOUSE Phosphoglycerate kinase 1 OS=Mus musculus OX=10090 GN=Pgk1 PE=1 SV=4	1	2	2	2	8.4	44.55	8222900	7556900	9292400		8383100	8560500	8357400	8471800	0.986496	-	0.872649
Q922B2	Dars1	sp|Q922B2|SYDC_MOUSE Aspartate--tRNA ligase, cytoplasmic OS=Mus musculus OX=10090 GN=Dars1 PE=1 SV=2	1	4	4	4	10.8	57.147	6026100	6535800	17102000	7708000	8462600	14018000	9.88797e+06	1.00629e+07	0.982619	-	0.968188
P06684;CON__Q1A7A4	C5	sp|P06684|CO5_MOUSE Complement C5 OS=Mus musculus OX=10090 GN=C5 PE=1 SV=2	2	58	58	58	40.5	188.88	982440000	686860000	572460000	758860000	768470000	756230000	7.47253e+08	7.61187e+08	0.981695	-	0.914715
P04945		sp|P04945|KV6AB_MOUSE Ig kappa chain V-VI region NQ2-6.1 OS=Mus musculus OX=10090 PE=2 SV=1	1	3	3	3	38.9	11.713	1406800000	902850000	913690000	1042900000	925550000	1327500000	1.07445e+09	1098650000	0.97797	-	0.91154
P07356	Anxa2	sp|P07356|ANXA2_MOUSE Annexin A2 OS=Mus musculus OX=10090 GN=Anxa2 PE=1 SV=2	1	8	8	8	31.3	38.676	13148000	18004000	23976000	21852000	19082000	15681000	18376000	1.88717e+07	0.973735	-	0.897258
P07759;Q80X76	Serpina3k	sp|P07759|SPA3K_MOUSE Serine protease inhibitor A3K OS=Mus musculus OX=10090 GN=Serpina3k PE=1 SV=2	2	14	14	7	37.3	46.879	5542300000	4529300000	2977400000	4586900000	4230700000	4611400000	4.34967e+09	4.47633e+09	0.971703	-	0.875056
P52430	Pon1	sp|P52430|PON1_MOUSE Serum paraoxonase/arylesterase 1 OS=Mus musculus OX=10090 GN=Pon1 PE=1 SV=2	1	5	5	5	16.6	39.565	240940000	250570000	200840000	180870000	305930000	226830000	2.30783e+08	2.37877e+08	0.970181	-	0.866445
P11499	Hsp90ab1	sp|P11499|HS90B_MOUSE Heat shock protein HSP 90-beta OS=Mus musculus OX=10090 GN=Hsp90ab1 PE=1 SV=3	1	8	8	2	14.1	83.28	17171000	15829000	18213000	24182000	13259000	15381000	17071000	1.76073e+07	0.969539	-	0.882791
P16301	Lcat	sp|P16301|LCAT_MOUSE Phosphatidylcholine-sterol acyltransferase OS=Mus musculus OX=10090 GN=Lcat PE=1 SV=2	1	9	9	9	31.1	49.746	36896000	35532000	19718000	36499000	24974000	33700000	3.07153e+07	3.17243e+07	0.968195	-	0.884408
P62334	Psmc6	sp|P62334|PRS10_MOUSE 26S proteasome regulatory subunit 10B OS=Mus musculus OX=10090 GN=Psmc6 PE=1 SV=1	1	6	6	6	24.9	44.172	28052000	34110000	32543000	32000000	36430000	29673000	3.15683e+07	32701000	0.965363	-	0.695098
P02088;CON__Q3SX09;P02104;CON__P02070	Hbb-b1	sp|P02088|HBB1_MOUSE Hemoglobin subunit beta-1 OS=Mus musculus OX=10090 GN=Hbb-b1 PE=1 SV=2	4	10	10	4	70.7	15.84	13668000000	11197000000	9422900000	11754000000	12254000000	11591000000	11429300000	1.18663e+10	0.96317	-	0.743666
Q8K1I3	Spp2	sp|Q8K1I3|SPP24_MOUSE Secreted phosphoprotein 24 OS=Mus musculus OX=10090 GN=Spp2 PE=1 SV=2	1	2	2	2	10.8	23.136	44401000	30872000	17765000	30955000	36206000	29766000	3.10127e+07	32309000	0.959877	-	0.878225
P21981	Tgm2	sp|P21981|TGM2_MOUSE Protein-glutamine gamma-glutamyltransferase 2 OS=Mus musculus OX=10090 GN=Tgm2 PE=1 SV=4	1	8	8	8	13.4	77.06	8942900	24486000	18540000	17336000	20560000	16517000	1.7323e+07	1.81377e+07	0.955082	-	0.870615
Q9R1P0	Psma4	sp|Q9R1P0|PSA4_MOUSE Proteasome subunit alpha type-4 OS=Mus musculus OX=10090 GN=Psma4 PE=1 SV=1	1	7	7	7	33.3	29.47	204100000	221490000	205550000	223740000	222530000	216350000	210380000	2.20873e+08	0.952492	-	0.156406
P54116	Stom	sp|P54116|STOM_MOUSE Stomatin OS=Mus musculus OX=10090 GN=Stom PE=1 SV=3	1	4	4	4	17.6	31.375	46904000	28493000	48846000	38825000	49386000	42455000	4.14143e+07	4.35553e+07	0.950844	-	0.78061
P01634		sp|P01634|KV5A2_MOUSE Ig kappa chain V-V region MOPC 21 OS=Mus musculus OX=10090 PE=1 SV=1	1	2	1	1	13.2	14.902	17116000	22964000	27152000	35269000	16151000	19310000	2.24107e+07	2.35767e+07	0.950544	-	0.868234
P31230	Aimp1	sp|P31230|AIMP1_MOUSE Aminoacyl tRNA synthase complex-interacting multifunctional protein 1 OS=Mus musculus OX=10090 GN=Aimp1 PE=1 SV=2	1	3	3	3	17.4	33.997	6754800	6883600	35626000	18814000	16818000	16221000	1.64215e+07	1.72843e+07	0.950078	-	0.93294
P01845	Iglc3	sp|P01845|LAC3_MOUSE Ig lambda-3 chain C region OS=Mus musculus OX=10090 GN=Iglc3 PE=1 SV=1	1	5	2	2	74	11.371	22659000	16135000	16724000		15153000	23847000	18506000	19500000	0.949026	-	0.828593
Q61129	Cfi	sp|Q61129|CFAI_MOUSE Complement factor I OS=Mus musculus OX=10090 GN=Cfi PE=1 SV=3	1	19	19	19	38.3	67.26	194950000	144950000	86672000	150270000	146720000	152530000	1.42191e+08	149840000	0.94895	-	0.819142
P08607	C4bpa	sp|P08607|C4BPA_MOUSE C4b-binding protein OS=Mus musculus OX=10090 GN=C4bpa PE=1 SV=3	1	12	12	12	31.6	51.523	3797200000	3525100000	4613900000	4093100000	4465100000	4065600000	3.97873e+09	4.20793e+09	0.945531	-	0.550045
Q8CGC7	Eprs1	sp|Q8CGC7|SYEP_MOUSE Bifunctional glutamate/proline--tRNA ligase OS=Mus musculus OX=10090 GN=Eprs1 PE=1 SV=4	1	6	6	6	5.9	170.08	5891700	5426800	30688000	17409000	13551000	13569000	1.40022e+07	14843000	0.943352	-	0.925454
Q01279	Egfr	sp|Q01279|EGFR_MOUSE Epidermal growth factor receptor OS=Mus musculus OX=10090 GN=Egfr PE=1 SV=1	1	18	18	18	19.1	134.85	356380000	213670000	141160000	248020000	272490000	234660000	237070000	2.51723e+08	0.941788	-	0.830607
P01942	Hba	sp|P01942|HBA_MOUSE Hemoglobin subunit alpha OS=Mus musculus OX=10090 GN=Hba PE=1 SV=2	1	9	9	7	70.4	15.085	11326000000	10783000000	10198000000	11980000000	12610000000	9999400000	10769000000	11529800000	0.934014	-	0.421991
Q61207	Psap	sp|Q61207|SAP_MOUSE Prosaposin OS=Mus musculus OX=10090 GN=Psap PE=1 SV=2	1	3	3	3	5.7	61.422	17459000	15967000	13317000	21597000	14619000	13849000	15581000	1.66883e+07	0.933646	-	0.707379
Q8CF98	Colec10	sp|Q8CF98|COL10_MOUSE Collectin-10 OS=Mus musculus OX=10090 GN=Colec10 PE=2 SV=1	1	8	8	8	35	30.523	53379000	70747000	88455000	70063000	74020000	84044000	7.08603e+07	7.60423e+07	0.931854	-	0.660632
P20029	Hspa5	sp|P20029|BIP_MOUSE Endoplasmic reticulum chaperone BiP OS=Mus musculus OX=10090 GN=Hspa5 PE=1 SV=3	1	13	11	11	25.3	72.421	28762000	34223000	40520000	37424000	39203000	34768000	3.45017e+07	3.71317e+07	0.929171	-	0.509219
Q9QXC1	Fetub	sp|Q9QXC1|FETUB_MOUSE Fetuin-B OS=Mus musculus OX=10090 GN=Fetub PE=1 SV=1	1	11	11	11	35.6	42.712	192750000	173720000	77676000	162170000	161750000	154170000	1.48049e+08	1.59363e+08	0.929001	-	0.767189
Q61147;CON__ENSEMBL:ENSBTAP00000031900	Cp	sp|Q61147|CERU_MOUSE Ceruloplasmin OS=Mus musculus OX=10090 GN=Cp PE=1 SV=2	2	46	46	46	48.6	121.15	1825300000	1555900000	1108000000	1705700000	1622700000	1528200000	1496400000	1.61887e+09	0.92435	-	0.600034
Q00623;CON__P15497	Apoa1	sp|Q00623|APOA1_MOUSE Apolipoprotein A-I OS=Mus musculus OX=10090 GN=Apoa1 PE=1 SV=2	2	22	22	22	55.7	30.615	11770000000	10839000000	7443300000	12042000000	10614000000	9915100000	1.00174e+10	1.0857e+10	0.922668	-	0.595121
P04186;CON__Q3KUS7	Cfb	sp|P04186|CFAB_MOUSE Complement factor B OS=Mus musculus OX=10090 GN=Cfb PE=1 SV=2	2	28	28	28	42.3	85.004	646800000	463000000	316930000	586520000	519240000	441580000	4.75577e+08	515780000	0.922053	-	0.719307
P13634	Ca1	sp|P13634|CAH1_MOUSE Carbonic anhydrase 1 OS=Mus musculus OX=10090 GN=Ca1 PE=1 SV=4	1	4	4	4	21.5	28.33	13799000	8152300	11770000	13531000	12159000	10886000	1.12404e+07	12192000	0.921952	-	0.628613
P62196	Psmc5	sp|P62196|PRS8_MOUSE 26S proteasome regulatory subunit 8 OS=Mus musculus OX=10090 GN=Psmc5 PE=1 SV=1	1	7	7	7	24.1	45.626	13347000	12874000	12789000	11418000	17207000	13861000	1.30033e+07	14162000	0.918185	-	0.52991
Q8K479	C1qtnf5	sp|Q8K479|C1QT5_MOUSE Complement C1q tumor necrosis factor-related protein 5 OS=Mus musculus OX=10090 GN=C1qtnf5 PE=1 SV=1	1	4	4	4	19.8	25.436	23292000	13078000	24979000	25579000	23501000	17990000	2.04497e+07	2.23567e+07	0.914701	-	0.683947
Q00519	Xdh	sp|Q00519|XDH_MOUSE Xanthine dehydrogenase/oxidase OS=Mus musculus OX=10090 GN=Xdh PE=1 SV=5	1	5	5	5	5.1	146.56	21041000	28518000	17763000	23675000	25454000	24629000	2.24407e+07	24586000	0.912742	-	0.542166
Q9R1P4	Psma1	sp|Q9R1P4|PSA1_MOUSE Proteasome subunit alpha type-1 OS=Mus musculus OX=10090 GN=Psma1 PE=1 SV=1	1	14	14	14	52.5	29.546	488860000	504800000	511690000	529810000	625150000	497730000	5.01783e+08	5.50897e+08	0.910848	-	0.274886
Q9ESB3	Hrg	sp|Q9ESB3|HRG_MOUSE Histidine-rich glycoprotein OS=Mus musculus OX=10090 GN=Hrg PE=1 SV=2	1	12	12	12	23	59.162	862780000	873650000	540310000	760790000	1020900000	719010000	7.58913e+08	8.33567e+08	0.910441	-	0.632626
P49182;CON__ENSEMBL:ENSBTAP00000018574	Serpind1	sp|P49182|HEP2_MOUSE Heparin cofactor 2 OS=Mus musculus OX=10090 GN=Serpind1 PE=1 SV=1	2	10	10	10	24.1	54.496	123180000	110000000	81346000	122360000	115900000	108810000	104842000	115690000	0.906232	-	0.449468
Q6GQT1	A2m	sp|Q6GQT1|A2MG_MOUSE Alpha-2-macroglobulin-P OS=Mus musculus OX=10090 GN=A2m PE=2 SV=2	1	26	25	24	23.8	164.35	57721000	79229000	70138000	75464000	81248000	71820000	6.90293e+07	7.61773e+07	0.906166	-	0.353188
Q8BG32	Psmd11	sp|Q8BG32|PSD11_MOUSE 26S proteasome non-ATPase regulatory subunit 11 OS=Mus musculus OX=10090 GN=Psmd11 PE=1 SV=3	1	10	10	10	31	47.436	32636000	41003000	42695000	38634000	45840000	43929000	38778000	42801000	0.906007	-	0.347577
Q63880;Q8VCU1	Ces3a	sp|Q63880|EST3A_MOUSE Carboxylesterase 3A OS=Mus musculus OX=10090 GN=Ces3a PE=1 SV=2	2	4	4	4	10.2	63.317	48791000	57369000	46902000	40400000	63972000	64610000	5.10207e+07	5.63273e+07	0.905789	-	0.570257
Q00896;P07758	Serpina1c; Serpina1a	sp|Q00896|A1AT3_MOUSE Alpha-1-antitrypsin 1-3 OS=Mus musculus OX=10090 GN=Serpina1c PE=1 SV=2;sp|P07758|A1AT1_MOUSE Alpha-1-antitrypsin 1-1 OS=Mus musculus OX=10090 GN=Serpina1a PE=1 SV=4	2	17	8	7	50.2	45.823	7706300000	7431600000	5421700000	7224700000	7720900000	7832800000	6853200000	7592800000	0.902592	-	0.376435
Q61730	Il1rap	sp|Q61730|IL1AP_MOUSE Interleukin-1 receptor accessory protein OS=Mus musculus OX=10090 GN=Il1rap PE=1 SV=1	1	11	11	11	19.5	65.74	80932000	71847000	48574000	80310000	68893000	74005000	6.71177e+07	7.44027e+07	0.902087	-	0.513998
P31532	Saa4	sp|P31532|SAA4_MOUSE Serum amyloid A-4 protein OS=Mus musculus OX=10090 GN=Saa4 PE=1 SV=2	1	6	6	6	50	15.088	183020000	153060000	78220000	128230000	144700000	186370000	138100000	153100000	0.902025	-	0.695511
O08677	Kng1	sp|O08677|KNG1_MOUSE Kininogen-1 OS=Mus musculus OX=10090 GN=Kng1 PE=1 SV=1	1	20	20	20	33.1	73.101	1111000000	1024900000	693170000	1035500000	1134400000	969310000	9.43023e+08	1.0464e+09	0.901204	-	0.489828
P07309	Ttr	sp|P07309|TTHY_MOUSE Transthyretin OS=Mus musculus OX=10090 GN=Ttr PE=1 SV=1	1	6	6	6	56.5	15.776	4776100000	3200600000	2434900000	3957900000	3474300000	4180000000	3.47053e+09	3.87073e+09	0.896609	-	0.607942
P46471	Psmc2	sp|P46471|PRS7_MOUSE 26S proteasome regulatory subunit 7 OS=Mus musculus OX=10090 GN=Psmc2 PE=1 SV=5	1	9	9	9	27.3	48.647	34081000	35566000	41614000	40561000	44070000	39735000	37087000	4.14553e+07	0.894626	-	0.175829
O35593	Psmd14	sp|O35593|PSDE_MOUSE 26S proteasome non-ATPase regulatory subunit 14 OS=Mus musculus OX=10090 GN=Psmd14 PE=1 SV=2	1	2	2	2	9.4	34.577	11373000	13020000	16728000	14733000	17626000	13609000	13707000	1.53227e+07	0.894557	-	0.461308
Q00897	Serpina1d	sp|Q00897|A1AT4_MOUSE Alpha-1-antitrypsin 1-4 OS=Mus musculus OX=10090 GN=Serpina1d PE=1 SV=1	1	17	17	7	46.7	45.998	10017000000	7908600000	5618100000	8756100000	9049000000	8583300000	7847900000	8.79613e+09	0.892199	-	0.499142
Q61704;CON__Q0V8M9	Itih3	sp|Q61704|ITIH3_MOUSE Inter-alpha-trypsin inhibitor heavy chain H3 OS=Mus musculus OX=10090 GN=Itih3 PE=1 SV=3	2	7	7	7	8	99.357	29614000	31656000	24638000	37454000	29884000	28953000	28636000	32097000	0.892171	-	0.366825
P01898;P01897;P14429;P01901;P01900;P01902;P14426;P06339;P01896;P01895;P14428;P03991;P04223;P14431;P14427;P14432	H2-Q10	sp|P01898|HA10_MOUSE H-2 class I histocompatibility antigen, Q10 alpha chain OS=Mus musculus OX=10090 GN=H2-Q10 PE=1 SV=3	16	16	16	11	48.6	37.251	181490000	202930000	155930000	179980000	197540000	228470000	1.80117e+08	2.01997e+08	0.891681	-	0.327532
Q8K1B8	Fermt3	sp|Q8K1B8|URP2_MOUSE Fermitin family homolog 3 OS=Mus musculus OX=10090 GN=Fermt3 PE=1 SV=1	1	5	5	5	10.5	75.634	18906000	30170000	39557000	36793000	35505000	27372000	2.95443e+07	3.32233e+07	0.889265	-	0.610003
Q9JJN5;CON__Q2KJ83	Cpn1	sp|Q9JJN5|CBPN_MOUSE Carboxypeptidase N catalytic chain OS=Mus musculus OX=10090 GN=Cpn1 PE=1 SV=1	2	10	10	10	31.3	51.845	396020000	350510000	263660000	416360000	359540000	363710000	336730000	379870000	0.886435	-	0.37166
P17751	Tpi1	sp|P17751|TPIS_MOUSE Triosephosphate isomerase OS=Mus musculus OX=10090 GN=Tpi1 PE=1 SV=5	1	3	3	3	22.1	26.712	12579000	15732000		15016000		16982000	14155500	15999000	0.884774	-	0.425636
P46412;P21765	Gpx3	sp|P46412|GPX3_MOUSE Glutathione peroxidase 3 OS=Mus musculus OX=10090 GN=Gpx3 PE=1 SV=2	2	5	5	5	27.9	25.424	366390000	298520000	261410000	337810000	378840000	333220000	3.08773e+08	3.49957e+08	0.882319	-	0.292276
O70435	Psma3	sp|O70435|PSA3_MOUSE Proteasome subunit alpha type-3 OS=Mus musculus OX=10090 GN=Psma3 PE=1 SV=3	1	8	8	8	28.2	28.405	253400000	281790000	338340000	290130000	367410000	334870000	2.91177e+08	3.30803e+08	0.880211	-	0.302886
P99026	Psmb4	sp|P99026|PSB4_MOUSE Proteasome subunit beta type-4 OS=Mus musculus OX=10090 GN=Psmb4 PE=1 SV=1	1	6	6	6	31.8	29.116	250550000	246380000	231870000	229890000	311050000	287380000	2.42933e+08	2.76107e+08	0.879853	-	0.251257
Q8R016	Blmh	sp|Q8R016|BLMH_MOUSE Bleomycin hydrolase OS=Mus musculus OX=10090 GN=Blmh PE=1 SV=1	1	6	6	6	14.7	52.511	50601000	40216000	38577000	57631000	47036000	42434000	4.31313e+07	4.90337e+07	0.879627	-	0.371289
P06330;P01757;P01756;P06329		sp|P06330|HVM51_MOUSE Ig heavy chain V region AC38 205.12 OS=Mus musculus OX=10090 PE=1 SV=1;sp|P01757|HVM13_MOUSE Ig heavy chain V region J558 OS=Mus musculus OX=10090 PE=1 SV=1;sp|P01756|HVM12_MOUSE Ig heavy chain V region MOPC 104E OS=Mus musculus OX=10	4	7	7	6	72	12.934	13466000000	13806000000	17350000000	17620000000	17324000000	16113000000	14874000000	17019000000	0.873964	-	0.180706
O08992	Sdcbp	sp|O08992|SDCB1_MOUSE Syntenin-1 OS=Mus musculus OX=10090 GN=Sdcbp PE=1 SV=1	1	2	2	2	7	32.379	15322000	15362000	18472000		22011000	15571000	1.63853e+07	18791000	0.871978	-	0.446408
P35700	Prdx1	sp|P35700|PRDX1_MOUSE Peroxiredoxin-1 OS=Mus musculus OX=10090 GN=Prdx1 PE=1 SV=1	1	2	2	2	9	22.176	19739000	9462700	21348000	20545000	19520000	18124000	16849900	1.93963e+07	0.868716	-	0.53829
P28843	Dpp4	sp|P28843|DPP4_MOUSE Dipeptidyl peptidase 4 OS=Mus musculus OX=10090 GN=Dpp4 PE=1 SV=3	1	3	3	3	3.9	87.436	7035900	8451500	12075000	9514500	11386000	10860000	9.18747e+06	1.05868e+07	0.86782	-	0.431325
Q06890	Clu	sp|Q06890|CLUS_MOUSE Clusterin OS=Mus musculus OX=10090 GN=Clu PE=1 SV=1	1	17	17	17	36.4	51.655	897730000	908080000	849020000	1016000000	1056600000	989930000	8.84943e+08	1.02084e+09	0.866875	-	0.00694342
P24549;O35945	Aldh1a1; Aldh1a7	sp|P24549|AL1A1_MOUSE Retinal dehydrogenase 1 OS=Mus musculus OX=10090 GN=Aldh1a1 PE=1 SV=5;sp|O35945|AL1A7_MOUSE Aldehyde dehydrogenase, cytosolic 1 OS=Mus musculus OX=10090 GN=Aldh1a7 PE=1 SV=1	2	6	6	6	23.4	54.467	29438000	24923000	22387000	34016000	25695000	29886000	2.55827e+07	2.98657e+07	0.856591	-	0.247494
Q3SXB8	Colec11	sp|Q3SXB8|COL11_MOUSE Collectin-11 OS=Mus musculus OX=10090 GN=Colec11 PE=2 SV=2	1	8	8	8	27.9	28.989	138420000	271530000	244670000	280060000	260450000	228440000	2.18207e+08	2.56317e+08	0.851317	-	0.42883
O88685	Psmc3	sp|O88685|PRS6A_MOUSE 26S proteasome regulatory subunit 6A OS=Mus musculus OX=10090 GN=Psmc3 PE=1 SV=2	1	7	7	7	20.8	49.548	39766000	30057000	43614000	38039000	50545000	44940000	3.78123e+07	44508000	0.849563	-	0.284109
Q9DBD0	Ica	sp|Q9DBD0|ICA_MOUSE Inhibitor of carbonic anhydrase OS=Mus musculus OX=10090 GN=Ica PE=1 SV=1	1	33	32	31	51.4	76.765	253780000	172470000	132470000	217160000	233460000	207720000	186240000	2.19447e+08	0.84868	-	0.414087
P21614	Gc	sp|P21614|VTDB_MOUSE Vitamin D-binding protein OS=Mus musculus OX=10090 GN=Gc PE=1 SV=2	1	23	23	23	60.3	53.6	1678700000	1538900000	948130000	1580800000	1649100000	1681000000	1.38858e+09	1.63697e+09	0.848262	-	0.333128
Q01339;CON__P17690	Apoh	sp|Q01339|APOH_MOUSE Beta-2-glycoprotein 1 OS=Mus musculus OX=10090 GN=Apoh PE=1 SV=1	2	17	17	17	41.4	38.618	601840000	477090000	406320000	548180000	603480000	602360000	4.95083e+08	5.84673e+08	0.846769	-	0.209669
P35762	Cd81	sp|P35762|CD81_MOUSE CD81 antigen OS=Mus musculus OX=10090 GN=Cd81 PE=1 SV=2	1	2	2	2	17.8	25.814	15989000	22324000	23455000	23209000	25673000		2.05893e+07	24441000	0.84241	-	0.307026
P26262;P04187	Klkb1	sp|P26262|KLKB1_MOUSE Plasma kallikrein OS=Mus musculus OX=10090 GN=Klkb1 PE=1 SV=2	2	26	26	25	43.6	71.382	296490000	313370000	238910000	374550000	338490000	297990000	2.82923e+08	337010000	0.83951	-	0.161888
Q9CPY7	Lap3	sp|Q9CPY7|AMPL_MOUSE Cytosol aminopeptidase OS=Mus musculus OX=10090 GN=Lap3 PE=1 SV=3	1	6	6	6	14.3	56.141	26678000	20100000	13239000		28901000	18872000	2.00057e+07	23886500	0.83753	-	0.578603
Q9Z2U0;Q9CWH6	Psma7	sp|Q9Z2U0|PSA7_MOUSE Proteasome subunit alpha type-7 OS=Mus musculus OX=10090 GN=Psma7 PE=1 SV=1	2	10	10	10	52.8	27.855	138220000	157470000	155740000	168250000	201780000	169710000	1.50477e+08	1.79913e+08	0.836384	-	0.07891
P26039	Tln1	sp|P26039|TLN1_MOUSE Talin-1 OS=Mus musculus OX=10090 GN=Tln1 PE=1 SV=2	1	9	9	9	5.9	269.82	11412000	8759200	17920000	15197000	17644000	12745000	1.26971e+07	1.51953e+07	0.83559	-	0.461032
Q8R0Z6;Q9R045	Angptl6	sp|Q8R0Z6|ANGL6_MOUSE Angiopoietin-related protein 6 OS=Mus musculus OX=10090 GN=Angptl6 PE=2 SV=1	2	21	21	21	61.9	51.095	96708000	109090000	134680000	132720000	141800000	134020000	1.13493e+08	136180000	0.833402	-	0.12059
P08752;B2RSH2;P18872;Q9DC51;P63094;Q8CGK7;P20612;P50149;Q6R0H7;Q3V3I2	Gnai2; Gnai1	sp|P08752|GNAI2_MOUSE Guanine nucleotide-binding protein G(i) subunit alpha-2 OS=Mus musculus OX=10090 GN=Gnai2 PE=1 SV=5;sp|B2RSH2|GNAI1_MOUSE Guanine nucleotide-binding protein G(i) subunit alpha-1 OS=Mus musculus OX=10090 GN=Gnai1 PE=1 SV=1;sp|P18872|GN	10	4	4	4	13.8	40.489	6167800	9312500	15123000	9884800	11936000	15006000	10201100	12275600	0.831006	-	0.529337
O09061	Psmb1	sp|O09061|PSB1_MOUSE Proteasome subunit beta type-1 OS=Mus musculus OX=10090 GN=Psmb1 PE=1 SV=1	1	6	6	6	32.1	26.372	279760000	250140000	309520000	380180000	308600000	322890000	2.79807e+08	3.37223e+08	0.829737	-	0.107687
Q921I1;CON__Q29443;CON__Q0IIK2	Tf	sp|Q921I1|TRFE_MOUSE Serotransferrin OS=Mus musculus OX=10090 GN=Tf PE=1 SV=1	3	49	49	46	64.4	76.723	9577500000	7643500000	5512200000	9511600000	9424100000	8517000000	7.57773e+09	9150900000	0.828086	-	0.265511
P97290	Serping1	sp|P97290|IC1_MOUSE Plasma protease C1 inhibitor OS=Mus musculus OX=10090 GN=Serping1 PE=1 SV=3	1	5	5	5	12.5	55.584	137820000	136570000	109870000	153420000	167110000	143670000	1.28087e+08	1.54733e+08	0.82779	-	0.0790923
P11680	Cfp	sp|P11680|PROP_MOUSE Properdin OS=Mus musculus OX=10090 GN=Cfp PE=1 SV=2	1	10	10	10	29.3	50.327	295680000	147170000	108650000	242400000	242430000	181850000	1.83833e+08	2.22227e+08	0.827233	-	0.560089
P01801;P01799;P01797;P01796;P01800;P01802		sp|P01801|HVM32_MOUSE Ig heavy chain V-III region J606 OS=Mus musculus OX=10090 PE=1 SV=1;sp|P01799|HVM30_MOUSE Ig heavy chain V-III region ABE-47N OS=Mus musculus OX=10090 PE=1 SV=1;sp|P01797|HVM28_MOUSE Ig heavy chain V-III region U61 OS=Mus musculus OX=	6	5	5	1	45.2	12.81	2671100000	3104400000	2554900000	3613600000	3353300000	3163400000	2776800000	3.37677e+09	0.822325	-	0.047403
Q7TSF1;Q61495;Q7TSF0	Dsg1b; Dsg1a; Dsg1c	sp|Q7TSF1|DSG1B_MOUSE Desmoglein-1-beta OS=Mus musculus OX=10090 GN=Dsg1b PE=1 SV=1;sp|Q61495|DSG1A_MOUSE Desmoglein-1-alpha OS=Mus musculus OX=10090 GN=Dsg1a PE=2 SV=2;sp|Q7TSF0|DSG1C_MOUSE Desmoglein-1-gamma OS=Mus musculus OX=10090 GN=Dsg1c PE=1 SV=1	3	1	1	1	0.9	114.45	31738000	52540000	80323000	78919000	65157000	56318000	54867000	66798000	0.821387	-	0.485283
P62192	Psmc1	sp|P62192|PRS4_MOUSE 26S proteasome regulatory subunit 4 OS=Mus musculus OX=10090 GN=Psmc1 PE=1 SV=1	1	4	4	4	14.5	49.184	13440000	12999000	16721000	18879000	19357000	14398000	1.43867e+07	1.75447e+07	0.820002	-	0.183829
P01872	Ighm	sp|P01872|IGHM_MOUSE Immunoglobulin heavy constant mu OS=Mus musculus OX=10090 GN=Ighm PE=1 SV=2	1	26	26	26	54.2	49.971	26021000000	32133000000	34469000000	42271000000	35906000000	35707000000	3.08743e+10	3.79613e+10	0.81331	-	0.0993356
P14148	Rpl7	sp|P14148|RL7_MOUSE 60S ribosomal protein L7 OS=Mus musculus OX=10090 GN=Rpl7 PE=1 SV=2	1	2	2	2	11.1	31.419	10577000	16387000	24731000	25453000	19551000	18614000	1.72317e+07	21206000	0.812584	-	0.439254
P17182;P17183	Eno1	sp|P17182|ENOA_MOUSE Alpha-enolase OS=Mus musculus OX=10090 GN=Eno1 PE=1 SV=3	2	4	4	4	10.6	47.14	24327000		19555000	31790000	27462000	21792000	21941000	2.70147e+07	0.812188	-	0.307696
Q3TXS7	Psmd1	sp|Q3TXS7|PSMD1_MOUSE 26S proteasome non-ATPase regulatory subunit 1 OS=Mus musculus OX=10090 GN=Psmd1 PE=1 SV=1	1	11	11	11	15.9	105.73	20003000	26140000	34217000	35091000	30488000	33461000	2.67867e+07	3.30133e+07	0.811389	-	0.223888
E9Q414;CON__ENSEMBL:ENSBTAP00000032840	Apob	sp|E9Q414|APOB_MOUSE Apolipoprotein B-100 OS=Mus musculus OX=10090 GN=Apob PE=1 SV=1	2	98	98	98	26.5	509.43	103750000	150430000	80584000	154090000	131520000	127490000	111588000	137700000	0.81037	-	0.303693
Q9QWK4	Cd5l	sp|Q9QWK4|CD5L_MOUSE CD5 antigen-like OS=Mus musculus OX=10090 GN=Cd5l PE=1 SV=3	1	22	22	22	55.4	38.862	3523200000	3451400000	4032700000	4746200000	3898200000	4943700000	3669100000	4.52937e+09	0.810069	-	0.0802565
Q99JI6	Rap1b	sp|Q99JI6|RAP1B_MOUSE Ras-related protein Rap-1b OS=Mus musculus OX=10090 GN=Rap1b PE=1 SV=2	1	3	3	1	18.5	20.825	485910000	553910000	804510000	905520000	575020000	796330000	6.14777e+08	7.58957e+08	0.810029	-	0.352757
P27773	Pdia3	sp|P27773|PDIA3_MOUSE Protein disulfide-isomerase A3 OS=Mus musculus OX=10090 GN=Pdia3 PE=1 SV=2	1	2	2	2	5	56.678	5210400		4566300	5688600	6778300	5713700	4888350	6060200	0.806632	-	0.110492
Q8VDM4	Psmd2	sp|Q8VDM4|PSMD2_MOUSE 26S proteasome non-ATPase regulatory subunit 2 OS=Mus musculus OX=10090 GN=Psmd2 PE=1 SV=1	1	9	9	9	14.5	100.2	24113000	35092000	49036000	49921000	38293000	46740000	3.60803e+07	4.49847e+07	0.802058	-	0.328216
O55234	Psmb5	sp|O55234|PSB5_MOUSE Proteasome subunit beta type-5 OS=Mus musculus OX=10090 GN=Psmb5 PE=1 SV=3	1	8	8	8	29.9	28.532	142700000	149730000	151360000	203900000	173890000	176070000	147930000	184620000	0.801267	-	0.0215432
P01790;P01794;P01791;P01788;P01787;P01789;P01793;P01792		sp|P01790|HVM21_MOUSE Ig heavy chain V region M511 OS=Mus musculus OX=10090 PE=1 SV=1;sp|P01794|HVM25_MOUSE Ig heavy chain V region HPCG14 OS=Mus musculus OX=10090 PE=1 SV=1;sp|P01791|HVM22_MOUSE Ig heavy chain V region HPCM6 OS=Mus musculus OX=10090 PE=1	8	4	4	3	45.1	13.652	319640000	361260000	429140000	362810000	562120000	461920000	3.70013e+08	4.62283e+08	0.800404	-	0.233431
P01806;P01812;P01808;P01807;P01809;P01810		sp|P01806|HVM36_MOUSE Ig heavy chain V region 441 OS=Mus musculus OX=10090 PE=4 SV=1;sp|P01812|HVM42_MOUSE Ig heavy chain V region MOPC 173 OS=Mus musculus OX=10090 PE=1 SV=1;sp|P01808|HVM38_MOUSE Ig heavy chain V region T601 OS=Mus musculus OX=10090 PE=1	6	3	3	2	23.3	12.911	1551500000	1622200000	1725900000	2081700000	2150800000	1897400000	1633200000	2043300000	0.799295	-	0.0107758
Q07797	Lgals3bp	sp|Q07797|LG3BP_MOUSE Galectin-3-binding protein OS=Mus musculus OX=10090 GN=Lgals3bp PE=1 SV=1	1	12	12	12	30	64.49	164750000	122540000	147360000	185030000	187380000	171490000	1.44883e+08	181300000	0.799136	-	0.0510287
P63101;P61982;Q9CQV8;P68510	Ywhaz	sp|P63101|1433Z_MOUSE 14-3-3 protein zeta/delta OS=Mus musculus OX=10090 GN=Ywhaz PE=1 SV=1	4	6	6	4	30.2	27.771	38491000	39308000	100730000	77435000	71527000	74470000	5.95097e+07	7.44773e+07	0.799031	-	0.509305
P01638;P01637		sp|P01638|KV5A6_MOUSE Ig kappa chain V-V region L6 (Fragment) OS=Mus musculus OX=10090 PE=4 SV=1;sp|P01637|KV5A5_MOUSE Ig kappa chain V-V region T1 OS=Mus musculus OX=10090 PE=4 SV=1	2	4	4	4	35.7	12.986	586130000	481860000	647310000	539230000	769040000	847160000	5.71767e+08	7.18477e+08	0.795804	-	0.23219
P09813	Apoa2	sp|P09813|APOA2_MOUSE Apolipoprotein A-II OS=Mus musculus OX=10090 GN=Apoa2 PE=1 SV=2	1	3	3	3	23.5	11.309	7591200000	5328400000	7089200000	7116000000	9167800000	8909000000	6669600000	8397600000	0.794227	-	0.140433
Q8R146	Apeh	sp|Q8R146|APEH_MOUSE Acylamino-acid-releasing enzyme OS=Mus musculus OX=10090 GN=Apeh PE=1 SV=3	1	7	7	7	15.8	81.58	13955000	7176000	9072100	12218000	13911000	11953000	10067700	12694000	0.793107	-	0.281255
Q61838	Pzp	sp|Q61838|PZP_MOUSE Pregnancy zone protein OS=Mus musculus OX=10090 GN=Pzp PE=1 SV=3	1	90	90	89	68.2	165.85	36855000000	50639000000	38859000000	56343000000	50497000000	52959000000	4.21177e+10	5.32663e+10	0.7907	-	0.0733737
O89020	Afm	sp|O89020|AFAM_MOUSE Afamin OS=Mus musculus OX=10090 GN=Afm PE=1 SV=2	1	13	13	13	27.6	69.378	160980000	157860000	104260000	188080000	188790000	158520000	1.41033e+08	1.78463e+08	0.790265	-	0.148339
P09581	Csf1r	sp|P09581|CSF1R_MOUSE Macrophage colony-stimulating factor 1 receptor OS=Mus musculus OX=10090 GN=Csf1r PE=1 SV=3	1	2	2	2	2.4	109.18	14215000	10336000	10687000	17441000	13901000	13403000	11746000	14915000	0.787529	-	0.148728
P23953;Q8VCT4;Q8VCC2;Q64176;Q91WU0	Ces1c	sp|P23953|EST1C_MOUSE Carboxylesterase 1C OS=Mus musculus OX=10090 GN=Ces1c PE=1 SV=4	5	19	19	19	42.2	61.055	1784100000	1576500000	962400000	1923000000	1903200000	1673900000	1441000000	1.83337e+09	0.785986	-	0.204813
Q91YN9	Bag2	sp|Q91YN9|BAG2_MOUSE BAG family molecular chaperone regulator 2 OS=Mus musculus OX=10090 GN=Bag2 PE=1 SV=1	1	5	5	5	29.5	23.473	19410000	10937000	16233000	17672000	20840000	20867000	1.55267e+07	19793000	0.784452	-	0.187827
P28666	Mug2	sp|P28666|MUG2_MOUSE Murinoglobulin-2 OS=Mus musculus OX=10090 GN=Mug2 PE=1 SV=2	1	26	3	3	18.6	162.38	7068000	15071000	10881000	9238900	21058000	11849000	1.10067e+07	1.40486e+07	0.783469	-	0.515118
Q99JI4	Psmd6	sp|Q99JI4|PSMD6_MOUSE 26S proteasome non-ATPase regulatory subunit 6 OS=Mus musculus OX=10090 GN=Psmd6 PE=1 SV=1	1	5	5	5	16.2	45.536	11774000	12989000	19688000	18454000	19426000	18866000	14817000	1.89153e+07	0.783333	-	0.173316
B2RQC6	Cad	sp|B2RQC6|PYR1_MOUSE CAD protein OS=Mus musculus OX=10090 GN=Cad PE=1 SV=1	1	5	5	5	3.1	243.24	5608900		8506400	10209000	8973000	7924300	7057650	9.03543e+06	0.781108	-	0.246103
P07724	Alb	sp|P07724|ALBU_MOUSE Albumin OS=Mus musculus OX=10090 GN=Alb PE=1 SV=3	1	56	56	52	81.7	68.692	46974000000	51295000000	36920000000	63847000000	53600000000	55740000000	45063000000	57729000000	0.780596	-	0.0744263
P13020;CON__Q3SX14	Gsn	sp|P13020|GELS_MOUSE Gelsolin OS=Mus musculus OX=10090 GN=Gsn PE=1 SV=3	2	26	26	26	34.6	85.941	448200000	346040000	214570000	411550000	455230000	428970000	336270000	4.31917e+08	0.778553	-	0.236832
Q8BK48	Ces2e	sp|Q8BK48|EST2E_MOUSE Pyrethroid hydrolase Ces2e OS=Mus musculus OX=10090 GN=Ces2e PE=1 SV=1	1	3	3	3	6.4	62.317	13890000	9140100	14181000	18081000	18037000	11764000	12403700	1.59607e+07	0.777142	-	0.252059
Q91X72	Hpx	sp|Q91X72|HEMO_MOUSE Hemopexin OS=Mus musculus OX=10090 GN=Hpx PE=1 SV=2	1	27	27	27	61.1	51.317	4098200000	3369500000	2414000000	4621100000	4018900000	4109100000	3293900000	4249700000	0.77509	-	0.141325
P03987		sp|P03987|IGHG3_MOUSE Ig gamma-3 chain C region OS=Mus musculus OX=10090 PE=1 SV=2	1	13	13	13	41	43.929	2944000000	1846200000	1864100000	2964500000	2769300000	2859500000	2218100000	2.86443e+09	0.774359	-	0.153309
Q60692	Psmb6	sp|Q60692|PSB6_MOUSE Proteasome subunit beta type-6 OS=Mus musculus OX=10090 GN=Psmb6 PE=1 SV=3	1	4	4	4	18.1	25.378	166690000	161920000	201680000	207330000	284520000	193180000	1.76763e+08	2.28343e+08	0.774112	-	0.171775
Q8BTM8;Q8VHX6	Flna	sp|Q8BTM8|FLNA_MOUSE Filamin-A OS=Mus musculus OX=10090 GN=Flna PE=1 SV=5	2	12	12	12	8.8	281.22	8956100	7682600	9664500	11514000	12965000	9876100	8.76773e+06	11451700	0.765627	-	0.0651952
Q03265	Atp5f1a	sp|Q03265|ATPA_MOUSE ATP synthase subunit alpha, mitochondrial OS=Mus musculus OX=10090 GN=Atp5f1a PE=1 SV=1	1	4	4	4	9.2	59.752	14714000	17880000	23451000	36726000	14525000	22155000	1.86817e+07	2.44687e+07	0.763493	-	0.454579
Q9QUM0	Itga2b	sp|Q9QUM0|ITA2B_MOUSE Integrin alpha-IIb OS=Mus musculus OX=10090 GN=Itga2b PE=1 SV=2	1	15	15	15	19.9	112.68	48907000	48429000	86352000	87065000	78732000	75746000	6.12293e+07	8.05143e+07	0.760477	-	0.21241
Q03734;P29621;Q6P4P1	Serpina3m	sp|Q03734|SPA3M_MOUSE Serine protease inhibitor A3M OS=Mus musculus OX=10090 GN=Serpina3m PE=1 SV=2	3	13	6	5	35.2	47.064	88740000	61858000	48231000	78651000	99961000	83810000	6.62763e+07	87474000	0.757669	-	0.192019
Q9WVK4;Q8BH64;Q9QXY6;Q9EQP2	Ehd1; Ehd2	sp|Q9WVK4|EHD1_MOUSE EH domain-containing protein 1 OS=Mus musculus OX=10090 GN=Ehd1 PE=1 SV=1;sp|Q8BH64|EHD2_MOUSE EH domain-containing protein 2 OS=Mus musculus OX=10090 GN=Ehd2 PE=1 SV=1;sp|Q9QXY6|EHD3_MOUSE EH domain-containing protein 3 OS=Mus musculu	4	2	2	2	3.4	60.602	9686800	5580300	11619000	12451000	11587000	11478000	8.96203e+06	1.18387e+07	0.757014	-	0.186593
P00920	Ca2	sp|P00920|CAH2_MOUSE Carbonic anhydrase 2 OS=Mus musculus OX=10090 GN=Ca2 PE=1 SV=4	1	8	8	8	39.2	29.032	181760000	119060000	114210000	150020000	224060000	174900000	1.38343e+08	1.82993e+08	0.756002	-	0.220303
P18531	Ighv3-6	sp|P18531|HVM60_MOUSE Ig heavy chain V region 3-6 OS=Mus musculus OX=10090 GN=Ighv3-6 PE=1 SV=1	1	2	2	2	31	13.095	195550000		315330000	381380000	315780000	320490000	255440000	3.39217e+08	0.753029	-	0.207584
P09055	Itgb1	sp|P09055|ITB1_MOUSE Integrin beta-1 OS=Mus musculus OX=10090 GN=Itgb1 PE=1 SV=1	1	8	8	8	13.7	88.231	9028900	7494400	14002000	12671000	12688000	15329000	10175100	1.35627e+07	0.750229	-	0.190813
P09470	Ace	sp|P09470|ACE_MOUSE Angiotensin-converting enzyme OS=Mus musculus OX=10090 GN=Ace PE=1 SV=3	1	4	4	4	4.9	150.92	12535000	11033000	11027000	16630000	16856000	13219000	1.15317e+07	1.55683e+07	0.740713	-	0.0343097
Q9D2G2	Dlst	sp|Q9D2G2|ODO2_MOUSE Dihydrolipoyllysine-residue succinyltransferase component of 2-oxoglutarate dehydrogenase complex, mitochondrial OS=Mus musculus OX=10090 GN=Dlst PE=1 SV=1	1	4	4	4	11.5	48.994	17324000	21879000	49211000	36905000	46468000	36163000	2.94713e+07	3.98453e+07	0.739643	-	0.378896
O54890	Itgb3	sp|O54890|ITB3_MOUSE Integrin beta-3 OS=Mus musculus OX=10090 GN=Itgb3 PE=1 SV=2	1	7	7	7	10.4	86.738	21591000	14181000	40203000	46101000	34684000	23192000	25325000	34659000	0.73069	-	0.411113
P32261;CON__P41361	Serpinc1	sp|P32261|ANT3_MOUSE Antithrombin-III OS=Mus musculus OX=10090 GN=Serpinc1 PE=1 SV=1	2	20	20	20	37.6	52.003	661460000	564630000	426640000	875280000	667450000	721640000	550910000	754790000	0.729885	-	0.0917
P83741;Q80UE6;Q3UH66	Wnk1	sp|P83741|WNK1_MOUSE Serine/threonine-protein kinase WNK1 OS=Mus musculus OX=10090 GN=Wnk1 PE=1 SV=2	3	5	5	5	2.7	250.93	5471700	5051300	6643200	7829000	6721400	9036900	5.72207e+06	7.86243e+06	0.727773	-	0.059592
P63017;P17156;Q61696;P16627;P17879	Hspa8	sp|P63017|HSP7C_MOUSE Heat shock cognate 71 kDa protein OS=Mus musculus OX=10090 GN=Hspa8 PE=1 SV=1	5	17	17	15	32.5	70.87	51681000	58415000	83278000	96360000	85993000	83745000	64458000	8.86993e+07	0.726702	-	0.0794725
Q8CG19	Ltbp1	sp|Q8CG19|LTBP1_MOUSE Latent-transforming growth factor beta-binding protein 1 OS=Mus musculus OX=10090 GN=Ltbp1 PE=1 SV=2	1	4	4	4	3.6	186.72	8854400	8714600		17173000	12819000	6783900	8784500	1.22586e+07	0.716597	-	0.437504
P51910	Apod	sp|P51910|APOD_MOUSE Apolipoprotein D OS=Mus musculus OX=10090 GN=Apod PE=1 SV=1	1	3	3	3	20.1	21.53	48150000	45385000	56559000	55692000	79226000	75623000	5.00313e+07	7.01803e+07	0.712897	-	0.0666187
Q9CQQ7	Atp5pb	sp|Q9CQQ7|AT5F1_MOUSE ATP synthase F(0) complex subunit B1, mitochondrial OS=Mus musculus OX=10090 GN=Atp5pb PE=1 SV=1	1	2	2	2	6.2	28.948		8725800	10174000	14971000	12643000	12398000	9449900	1.33373e+07	0.70853	-	0.0467104
P01635		sp|P01635|KV5A3_MOUSE Ig kappa chain V-V region K2 (Fragment) OS=Mus musculus OX=10090 PE=1 SV=1	1	4	4	4	40.9	12.581	1437100000	2063800000	2592300000	2921300000	2917600000	2783000000	2.03107e+09	2.87397e+09	0.706712	-	0.0666631
P10518	Alad	sp|P10518|HEM2_MOUSE Delta-aminolevulinic acid dehydratase OS=Mus musculus OX=10090 GN=Alad PE=1 SV=1	1	5	5	5	16.1	36.023	8928100	8461600	12106000	17477000	14084000	11100000	9831900	1.42203e+07	0.691397	-	0.113077
P01636		sp|P01636|KV5A4_MOUSE Ig kappa chain V-V region MOPC 149 OS=Mus musculus OX=10090 PE=1 SV=1	1	2	2	2	21.3	12.03	1275700000	2183100000	1178400000	2288900000	2142900000	2278500000	1.54573e+09	2.23677e+09	0.691057	-	0.0994157
P48036	Anxa5	sp|P48036|ANXA5_MOUSE Annexin A5 OS=Mus musculus OX=10090 GN=Anxa5 PE=1 SV=1	1	3	3	3	9.4	35.752	9723600		13305000	15154000	20907000	14523000	11514300	1.68613e+07	0.682882	-	0.166759
Q8K426	Retnlg	sp|Q8K426|RETNG_MOUSE Resistin-like gamma OS=Mus musculus OX=10090 GN=Retnlg PE=1 SV=1	1	4	4	4	38.5	12.535	206900000	137850000	158240000	168970000	301940000	279660000	1.67663e+08	250190000	0.670144	-	0.146822
P11859	Agt	sp|P11859|ANGT_MOUSE Angiotensinogen OS=Mus musculus OX=10090 GN=Agt PE=1 SV=1	1	6	6	6	17.6	51.99	47663000	38946000	31457000	67687000	58635000	50452000	3.93553e+07	5.89247e+07	0.667892	-	0.0457654
P14685	Psmd3	sp|P14685|PSMD3_MOUSE 26S proteasome non-ATPase regulatory subunit 3 OS=Mus musculus OX=10090 GN=Psmd3 PE=1 SV=3	1	6	6	6	13.4	60.718	5637200	10510000	8441300	15911000	13257000	8161900	8.19617e+06	12443300	0.658681	-	0.187732
P80316	Cct5	sp|P80316|TCPE_MOUSE T-complex protein 1 subunit epsilon OS=Mus musculus OX=10090 GN=Cct5 PE=1 SV=1	1	10	10	10	27.4	59.623	32435000	24976000	66923000	71041000	59343000	59964000	4.14447e+07	6.34493e+07	0.653193	-	0.177607
P56480	Atp5f1b	sp|P56480|ATPB_MOUSE ATP synthase subunit beta, mitochondrial OS=Mus musculus OX=10090 GN=Atp5f1b PE=1 SV=2	1	12	12	12	28.9	56.3	19746000	20587000	34944000	44268000	31814000	39236000	2.50923e+07	3.84393e+07	0.652778	-	0.094504
P48962;P51881;Q3V132	Slc25a4; Slc25a5	sp|P48962|ADT1_MOUSE ADP/ATP translocase 1 OS=Mus musculus OX=10090 GN=Slc25a4 PE=1 SV=4;sp|P51881|ADT2_MOUSE ADP/ATP translocase 2 OS=Mus musculus OX=10090 GN=Slc25a5 PE=1 SV=3	3	7	7	7	21.8	32.904	40472000	42035000	71240000	106540000	61931000	73825000	51249000	8.07653e+07	0.634542	-	0.151384
Q07235	Serpine2	sp|Q07235|GDN_MOUSE Glia-derived nexin OS=Mus musculus OX=10090 GN=Serpine2 PE=1 SV=2	1	5	5	5	12.3	44.207	24575000	11337000	17722000	27801000	29341000	27396000	17878000	2.81793e+07	0.634437	-	0.0561984
P24547	Impdh2	sp|P24547|IMDH2_MOUSE Inosine-5-monophosphate dehydrogenase 2 OS=Mus musculus OX=10090 GN=Impdh2 PE=1 SV=2	1	6	6	6	19.3	55.814	18783000	14133000	32483000	38582000	32487000	32315000	2.17997e+07	3.44613e+07	0.632583	-	0.097643
P14847	Crp	sp|P14847|CRP_MOUSE C-reactive protein OS=Mus musculus OX=10090 GN=Crp PE=1 SV=2	1	5	5	5	28.4	25.36	209530000	116350000	101360000	171370000	245290000	268340000	1.42413e+08	2.28333e+08	0.623708	-	0.127117
Q64727	Vcl	sp|Q64727|VINC_MOUSE Vinculin OS=Mus musculus OX=10090 GN=Vcl PE=1 SV=4	1	3	3	3	4.3	116.72	7109500		8323300	9393700	15422000	12352000	7716400	1.23892e+07	0.622831	-	0.134187
P80314	Cct2	sp|P80314|TCPB_MOUSE T-complex protein 1 subunit beta OS=Mus musculus OX=10090 GN=Cct2 PE=1 SV=4	1	9	9	9	25.2	57.477	26055000	21784000	43779000	56446000	55790000	40839000	3.05393e+07	51025000	0.598517	-	0.0723087
Q6ZWY9;Q64478;P10853;P10854;Q64475;Q64525;Q9D2U9;Q8CGP2;Q8CGP1;Q8CGP0;Q64524;P70696	H2bc4; H2bc9; H2b	sp|Q6ZWY9|H2B1C_MOUSE Histone H2B type 1-C/E/G OS=Mus musculus OX=10090 GN=H2bc4 PE=1 SV=3;sp|Q64478|H2B1H_MOUSE Histone H2B type 1-H OS=Mus musculus OX=10090 GN=H2bc9 PE=1 SV=3;sp|P10853|H2B1F_MOUSE Histone H2B type 1-F/J/L OS=Mus musculus OX=10090 GN=H2b	12	2	2	2	20.6	13.906	32282000	11625000	19696000	27634000	40179000	39053000	21201000	35622000	0.595166	-	0.116606
P62806	H4c1	sp|P62806|H4_MOUSE Histone H4 OS=Mus musculus OX=10090 GN=H4c1 PE=1 SV=2	1	5	5	5	50.5	11.367	38043000	34283000	81937000	112570000	74183000	75505000	51421000	8.74193e+07	0.588211	-	0.143282
Q68FD5	Cltc	sp|Q68FD5|CLH1_MOUSE Clathrin heavy chain 1 OS=Mus musculus OX=10090 GN=Cltc PE=1 SV=3	1	16	16	16	12.7	191.55	20266000	24382000	60947000	71917000	57286000	52053000	3.51983e+07	6.04187e+07	0.582574	-	0.151029
Q9D7G0;Q9CS42	Prps1	sp|Q9D7G0|PRPS1_MOUSE Ribose-phosphate pyrophosphokinase 1 OS=Mus musculus OX=10090 GN=Prps1 PE=1 SV=4	2	7	7	7	32.7	34.834	17325000	15328000	35369000	43463000	38132000	38279000	22674000	39958000	0.567446	-	0.0591271
Q00898	Serpina1e	sp|Q00898|A1AT5_MOUSE Alpha-1-antitrypsin 1-5 OS=Mus musculus OX=10090 GN=Serpina1e PE=1 SV=1	1	15	8	8	36.8	45.891	1469300000	1175500000	661380000	2441100000	1678800000	1772300000	1102060000	1.96407e+09	0.561111	-	0.0626234
P15105	Glul	sp|P15105|GLNA_MOUSE Glutamine synthetase OS=Mus musculus OX=10090 GN=Glul PE=1 SV=6	1	7	7	7	17.2	42.119	19400000		67042000	69219000	95141000	75150000	43221000	7.98367e+07	0.541368	-	0.171127
P35802	Gpm6a	sp|P35802|GPM6A_MOUSE Neuronal membrane glycoprotein M6-a OS=Mus musculus OX=10090 GN=Gpm6a PE=1 SV=1	1	2	2	2	9	31.149	7006700		10090000	14984000	20596000	11967000	8548350	15849000	0.539362	-	0.125388
Q6PAR5	Gapvd1	sp|Q6PAR5|GAPD1_MOUSE GTPase-activating protein and VPS9 domain-containing protein 1 OS=Mus musculus OX=10090 GN=Gapvd1 PE=1 SV=2	1	4	4	4	3.1	162.4	3192400		6069300	6583700	11058000		4630850	8820850	0.524989	-	0.255857
Q9D0M1	Prpsap1	sp|Q9D0M1|KPRA_MOUSE Phosphoribosyl pyrophosphate synthase-associated protein 1 OS=Mus musculus OX=10090 GN=Prpsap1 PE=1 SV=1	1	4	4	3	16.3	39.431	13257000		29334000	42465000	53204000	39556000	21295500	45075000	0.472446	-	0.0596192
Q571I9	Aldh16a1	sp|Q571I9|A16A1_MOUSE Aldehyde dehydrogenase family 16 member A1 OS=Mus musculus OX=10090 GN=Aldh16a1 PE=1 SV=2	1	5	5	5	7	84.755	11881000	21674000	34696000	69634000	31191000	47013000	2.27503e+07	4.92793e+07	0.461661	-	0.110176
Q6P8J7	Ckmt2	sp|Q6P8J7|KCRS_MOUSE Creatine kinase S-type, mitochondrial OS=Mus musculus OX=10090 GN=Ckmt2 PE=1 SV=1	1	4	4	3	16.9	47.473	5523900	4553800	6506600	3440300	12770000	20080000	5528100	1.20968e+07	0.45699	-	0.246922
O54962	Banf1	sp|O54962|BAF_MOUSE Barrier-to-autointegration factor OS=Mus musculus OX=10090 GN=Banf1 PE=1 SV=1	1	3	3	3	37.1	10.102	17445000		33180000	31903000	65736000	76925000	25312500	58188000	0.435012	-	0.172451
P07310	Ckm	sp|P07310|KCRM_MOUSE Creatine kinase M-type OS=Mus musculus OX=10090 GN=Ckm PE=1 SV=1	1	2	2	2	6	43.044	5828800	6355300		13376000		30468000	6092050	21922000	0.277897	-	0.205312
P56395	Cyb5a	sp|P56395|CYB5_MOUSE Cytochrome b5 OS=Mus musculus OX=10090 GN=Cyb5a PE=1 SV=2	1	3	3	3	34.3	15.241	10915000		13838000	29460000	56891000	64622000	12376500	5.03243e+07	0.245935	-	0.0709362

## Sheet: Table S2
Subcellular localization Note: Statistics on the subcellular localization information of differential proteins and proteins with or without presence.
Locations	Name	#Diff	DiffSeqs	DiffGenes
E.R.	endoplasmic reticulum	6	P33267;P24456;P82198;Q8BHN3;Q8CIM7;Q91WP6	Cyp2f2,Cyp2d10,Tgfbi,Ganab,Cyp2d26,Serpina3n
cysk	cytoskeleton	3	P68368;P60710;P68134	Tuba4a,Actb,Acta1
cyto	cytosol	41	P47754;P05064;Q8BMF4;Q91ZJ5;Q6P069;P42932;P47963;P01864;P09542;P47857;P17742;Q9JM62;Q9DCC4;P63001;Q60605;P61358;P62889;Q9EQK5;Q91YI0;Q91YP3;P01867;P16858;P09528;P40124;P31725;Q64514;P99024;P80317;P0CG50;P11983;P80315;P80318;P80313;Q63836;Q8R0Y6;Q91Y97;P49817;O35490;O09173;P04247;Q9WUB3	Capza2,Aldoa,Dlat,Ugp2,Sri,Cct8,Rpl13,-,Myl3,Pfkm,Ppia,Reep6,Pycr3,Rac1,Myl6,Rpl27,Rpl30,Mvp,Asl,Dera,Igh-3,Gapdh,Fth1,Cap1,S100a9,Tpp2,Tubb5,Cct6a,Ubc,Tcp1,Cct4,Cct3,Cct7,Selenbp2,Aldh1l1,Aldob,Cav1,Bhmt,Hgd,Mb,Pygm
extr	extracellular	39	Q8CG14;A6X935;Q61646;P01754;P01868;P01671;Q9Z126;O88451;P47878;P01878;B5X0G2;A2BIM8;P28653;Q8K0D2;Q9R098;P11589;P98064;P33587;Q61805;P41317;Q5FW60;P04939;P01749;Q8CG16;P11087;P03976;P15702;Q8CFX1;Q04857;P29788;Q9CWJ9;P05366;P01831;P05367;P39876;P01029;P07743;P98086;P01629	C1sa,Itih4,Hp,Ighv1-62-3,Ighg1,-,Pf4,Rdh7,Igfbp3,-,Mup17,Mup18,Bgn,Habp2,Hgfac,Mup2,Masp1,Proc,Lbp,Mbl2,Mup20,Mup3,Ighv1-61,C1ra,Col1a1,-,Spn,H6pd,Col6a1,Vtn,Atic,Saa1,Thy1,Saa2,Timp3,C4b,Bpifa2,C1qa,-
mito	mitochondria	5	P23927;Q9Z2W0;P84750;P14602;P49429	Cryab,Dnpep,-,Hspb1,Hpd
nucl	nucleus	5	P01631;Q8VDD5;P01678;P29391;A2AN08	-,Myh9,-,Ftl1,Ubr4
pero	peroxisome	1	Q8CAY6	Acat2
plas	plasma membrane	6	O55143;P48759;O70570;Q91WP0;P11714;P04919	Atp2a2,Ptx3,Pigr,Masp2,Cyp2d9,Slc4a1

## Sheet: Table S3
GO enrichment analysis results Note: The significance level of the enrichment of differential proteins and proteins with or without presence in various functional terms of the GO database was calculated using Fisher's Exact Test. 'Over' indicates that the proportion of differential proteins is greater than that of background proteins in the database. A P-value < 0.05 indicates significant enrichm…
GO-ID	GO-Term	Category	FDR	P-Value	#Diff	RichFactor	Over/Under	TestSeqs	TestGenes
GO:0070584	mitochondrion morphogenesis	P	0.01391620586708642	2.1726786978731576e-05	6	5.869158878504672	Over	A2BIM8,P04939,Q5FW60,Q8VDD5,B5X0G2,P11589	Mup18,Mup3,Mup20,Myh9,Mup17,Mup2
GO:0006457	protein folding	P	0.01391620586708642	9.375627444153426e-05	7	4.564901349948078	Over	P80317,P80315,P42932,P23927,P80318,P80313,P11983	Cct6a,Cct4,Cct8,Cryab,Cct3,Cct7,Tcp1
GO:0031674	I band	C	0.01391620586708642	0.00013091961028341523	6	5.030707610146862	Over	P31725,Q60605,P60710,O55143,P68134,P09542	S100a9,Myl6,Actb,Atp2a2,Acta1,Myl3
GO:0045834	positive regulation of lipid metabolic process	P	0.01391620586708642	0.00013270380674271855	5	5.869158878504672	Over	A2BIM8,P04939,Q5FW60,B5X0G2,P11589	Mup18,Mup3,Mup20,Mup17,Mup2
GO:0006112	energy reserve metabolic process	P	0.01391620586708642	0.00013270380674271855	5	5.869158878504672	Over	A2BIM8,P04939,Q5FW60,B5X0G2,P11589	Mup18,Mup3,Mup20,Mup17,Mup2
GO:0008355	olfactory learning	P	0.01391620586708642	0.00013270380674271855	5	5.869158878504672	Over	A2BIM8,P04939,Q5FW60,B5X0G2,P11589	Mup18,Mup3,Mup20,Mup17,Mup2
GO:0005550	pheromone binding	F	0.01391620586708642	0.00013270380674271855	5	5.869158878504672	Over	A2BIM8,P04939,Q5FW60,B5X0G2,P11589	Mup18,Mup3,Mup20,Mup17,Mup2
GO:0000772	mating pheromone activity	F	0.01391620586708642	0.00013270380674271855	5	5.869158878504672	Over	A2BIM8,P04939,Q5FW60,B5X0G2,P11589	Mup18,Mup3,Mup20,Mup17,Mup2
GO:0005009	insulin-activated receptor activity	F	0.01391620586708642	0.00013270380674271855	5	5.869158878504672	Over	A2BIM8,P04939,Q5FW60,B5X0G2,P11589	Mup18,Mup3,Mup20,Mup17,Mup2
GO:0045475	locomotor rhythm	P	0.01391620586708642	0.00013270380674271855	5	5.869158878504672	Over	A2BIM8,P04939,Q5FW60,B5X0G2,P11589	Mup18,Mup3,Mup20,Mup17,Mup2
GO:0005899	insulin receptor complex	C	0.01391620586708642	0.00013270380674271855	5	5.869158878504672	Over	A2BIM8,P04939,Q5FW60,B5X0G2,P11589	Mup18,Mup3,Mup20,Mup17,Mup2
GO:0031649	heat generation	P	0.01391620586708642	0.00013270380674271855	5	5.869158878504672	Over	A2BIM8,P04939,Q5FW60,B5X0G2,P11589	Mup18,Mup3,Mup20,Mup17,Mup2
GO:0061179	negative regulation of insulin secretion involved in cellular response to glucose stimulus	P	0.01391620586708642	0.00013270380674271855	5	5.869158878504672	Over	A2BIM8,P04939,Q5FW60,B5X0G2,P11589	Mup18,Mup3,Mup20,Mup17,Mup2
GO:0071240	cellular response to food	P	0.01391620586708642	0.00013270380674271855	5	5.869158878504672	Over	A2BIM8,P04939,Q5FW60,B5X0G2,P11589	Mup18,Mup3,Mup20,Mup17,Mup2
GO:0051055	negative regulation of lipid biosynthetic process	P	0.01391620586708642	0.00013270380674271855	5	5.869158878504672	Over	A2BIM8,P04939,Q5FW60,B5X0G2,P11589	Mup18,Mup3,Mup20,Mup17,Mup2
GO:0008286	insulin receptor signaling pathway	P	0.03940690300573424	0.0004509372244775691	6	4.401869158878504	Over	P63001,A2BIM8,P04939,Q5FW60,B5X0G2,P11589	Rac1,Mup18,Mup3,Mup20,Mup17,Mup2
GO:0005832	chaperonin-containing T-complex	C	0.03940690300573424	0.0004509372244775691	6	4.401869158878504	Over	P80317,P80315,P42932,P80318,P80313,P11983	Cct6a,Cct4,Cct8,Cct3,Cct7,Tcp1
GO:1904851	positive regulation of establishment of protein localization to telomere	P	0.03940690300573424	0.0004509372244775691	6	4.401869158878504	Over	P80317,P80315,P42932,P80318,P80313,P11983	Cct6a,Cct4,Cct8,Cct3,Cct7,Tcp1
GO:0035634	response to stilbenoid	P	0.03972521590884685	0.00047983414003057226	11	2.8069890288500607	Over	P05367,P05366,A2BIM8,P33267,Q8CIM7,P11714,P24456,P04939,Q5FW60,B5X0G2,P11589	Saa2,Saa1,Mup18,Cyp2f2,Cyp2d26,Cyp2d9,Cyp2d10,Mup3,Mup20,Mup17,Mup2
GO:0010907	positive regulation of glucose metabolic process	P	0.04702510210649268	0.0006875889055621944	5	4.890965732087228	Over	A2BIM8,P04939,Q5FW60,B5X0G2,P11589	Mup18,Mup3,Mup20,Mup17,Mup2
GO:0005720	nuclear heterochromatin	C	0.04702510210649268	0.0006875889055621944	5	4.890965732087228	Over	P80315,P47878,Q91Y97,P05064,P11983	Cct4,Igfbp3,Aldob,Aldoa,Tcp1
GO:0036094	small molecule binding	F	0.04702510210649268	0.0006875889055621944	5	4.890965732087228	Over	A2BIM8,P04939,Q5FW60,B5X0G2,P11589	Mup18,Mup3,Mup20,Mup17,Mup2
GO:0071394	cellular response to testosterone stimulus	P	0.04702510210649268	0.0006875889055621944	5	4.890965732087228	Over	A2BIM8,P04939,Q5FW60,B5X0G2,P11589	Mup18,Mup3,Mup20,Mup17,Mup2
GO:0044297	cell body	C	0.07262902762067107	0.0011081351957381472	9	2.934579439252336	Over	P80317,P80315,O88451,P42932,P60710,P68134,P80318,P80313,P11983	Cct6a,Cct4,Rdh7,Cct8,Actb,Acta1,Cct3,Cct7,Tcp1
GO:0032212	positive regulation of telomere maintenance via telomerase	P	0.07313638908146633	0.0011652991245499505	6	3.9127725856697815	Over	P80317,P80315,P42932,P80318,P80313,P11983	Cct6a,Cct4,Cct8,Cct3,Cct7,Tcp1
GO:0007339	binding of sperm to zona pellucida	P	0.07313638908146633	0.0012553607788935734	8	3.130218068535825	Over	P80317,P80315,P42932,Q91Y97,P05064,P80318,P80313,P11983	Cct6a,Cct4,Cct8,Aldob,Aldoa,Cct3,Cct7,Tcp1
GO:0051082	unfolded protein binding	F	0.07313638908146633	0.0012553607788935734	8	3.130218068535825	Over	P80317,P80315,P17742,P42932,P23927,P80318,P80313,P11983	Cct6a,Cct4,Ppia,Cct8,Cryab,Cct3,Cct7,Tcp1
GO:0050821	protein stabilization	P	0.10149726815588903	0.001806690087962424	9	2.7801278898180026	Over	P80317,P80315,P17742,P42932,P23927,P16858,P80318,P80313,P11983	Cct6a,Cct4,Ppia,Cct8,Cryab,Gapdh,Cct3,Cct7,Tcp1
GO:0010888	negative regulation of lipid storage	P	0.11278204662523385	0.0020792621437582845	5	4.192256341789053	Over	A2BIM8,P04939,Q5FW60,B5X0G2,P11589	Mup18,Mup3,Mup20,Mup17,Mup2
GO:0002199	zona pellucida receptor complex	C	0.13162621338115124	0.0025103537199202396	6	3.5214953271028033	Over	P80317,P80315,P42932,P80318,P80313,P11983	Cct6a,Cct4,Cct8,Cct3,Cct7,Tcp1
GO:0046931	pore complex assembly	P	0.16141527193633287	0.003488950569507513	4	4.695327102803738	Over	P80317,P80315,P42932,P80318	Cct6a,Cct4,Cct8,Cct3
GO:0008392	arachidonic acid epoxygenase activity	F	0.16141527193633287	0.003488950569507513	4	4.695327102803738	Over	P33267,Q8CIM7,P11714,P24456	Cyp2f2,Cyp2d26,Cyp2d9,Cyp2d10
GO:0042738	exogenous drug catabolic process	P	0.16141527193633287	0.003488950569507513	4	4.695327102803738	Over	P33267,Q8CIM7,P11714,P24456	Cyp2f2,Cyp2d26,Cyp2d9,Cyp2d10
GO:0032781	positive regulation of ATPase activity	P	0.16141527193633287	0.003488950569507513	4	4.695327102803738	Over	Q60605,Q91Y97,P05064,P09542	Myl6,Aldob,Aldoa,Myl3
GO:0009267	cellular response to starvation	P	0.1767411560224385	0.004793137009230678	5	3.6682242990654204	Over	A2BIM8,P04939,Q5FW60,B5X0G2,P11589	Mup18,Mup3,Mup20,Mup17,Mup2
GO:0060048	cardiac muscle contraction	P	0.1767411560224385	0.004793137009230678	5	3.6682242990654204	Over	Q60605,P60710,P68134,P09542,Q8VDD5	Myl6,Actb,Acta1,Myl3,Myh9
GO:0009060	aerobic respiration	P	0.1767411560224385	0.004793137009230678	5	3.6682242990654204	Over	A2BIM8,P04939,Q5FW60,B5X0G2,P11589	Mup18,Mup3,Mup20,Mup17,Mup2
GO:0005881	cytoplasmic microtubule	C	0.1767411560224385	0.004793137009230678	5	3.6682242990654204	Over	P05367,P05366,P99024,P68368,P33267	Saa2,Saa1,Tubb5,Tuba4a,Cyp2f2
GO:0019369	arachidonic acid metabolic process	P	0.1767411560224385	0.004831449274612114	3	5.869158878504672	Over	Q8CIM7,P11714,P24456	Cyp2d26,Cyp2d9,Cyp2d10
GO:0008395	steroid hydroxylase activity	F	0.1767411560224385	0.004831449274612114	3	5.869158878504672	Over	Q8CIM7,P11714,P24456	Cyp2d26,Cyp2d9,Cyp2d10
GO:0097254	renal tubular secretion	P	0.1767411560224385	0.004831449274612114	3	5.869158878504672	Over	Q8CIM7,P11714,P24456	Cyp2d26,Cyp2d9,Cyp2d10
GO:0098871	postsynaptic actin cytoskeleton	C	0.1767411560224385	0.004831449274612114	3	5.869158878504672	Over	P60710,P68134,Q8VDD5	Actb,Acta1,Myh9
GO:2000863	positive regulation of estrogen secretion	P	0.1767411560224385	0.004831449274612114	3	5.869158878504672	Over	Q8CIM7,P11714,P24456	Cyp2d26,Cyp2d9,Cyp2d10
GO:0055114	oxidation-reduction process	P	0.24607609590303123	0.006883247437847027	13	2.0078701426463357	Over	Q63836,O88451,P49429,P33267,P09528,O09173,Q8R0Y6,Q8CIM7,P11714,P16858,P29391,P24456,Q9DCC4	Selenbp2,Rdh7,Hpd,Cyp2f2,Fth1,Hgd,Aldh1l1,Cyp2d26,Cyp2d9,Gapdh,Ftl1,Cyp2d10,Pycr3
GO:0000792	heterochromatin	C	0.2934568151255159	0.00909167389738859	4	3.9127725856697815	Over	P80317,P42932,P80318,P80313	Cct6a,Cct8,Cct3,Cct7
GO:0001998	angiotensin-mediated vasoconstriction involved in regulation of systemic arterial blood pressure	P	0.2934568151255159	0.00909167389738859	4	3.9127725856697815	Over	P63001,Q8CIM7,P11714,P24456	Rac1,Cyp2d26,Cyp2d9,Cyp2d10
GO:0042535	positive regulation of tumor necrosis factor biosynthetic process	P	0.2934568151255159	0.00909167389738859	4	3.9127725856697815	Over	P15702,P23927,Q61805,P14602	Spn,Cryab,Lbp,Hspb1
GO:0045721	negative regulation of gluconeogenesis	P	0.2934568151255159	0.00932793436508315	5	3.2606438213914846	Over	A2BIM8,P04939,Q5FW60,B5X0G2,P11589	Mup18,Mup3,Mup20,Mup17,Mup2
GO:0006098	pentose-phosphate shunt	P	0.2934568151255159	0.00932793436508315	5	3.2606438213914846	Over	P47857,Q91Y97,Q91YP3,P05064,Q8CFX1	Pfkm,Aldob,Dera,Aldoa,H6pd
GO:0065003	protein-containing complex assembly	P	0.2934568151255159	0.00932793436508315	5	3.2606438213914846	Over	Q9Z126,P17742,Q6P069,P80313,P11983	Pf4,Ppia,Sri,Cct7,Tcp1
GO:1901998	toxin transport	P	0.4057886046971754	0.013156528187893164	6	2.7088425593098493	Over	P80317,P80315,P42932,P80318,P80313,P11983	Cct6a,Cct4,Cct8,Cct3,Cct7,Tcp1
GO:0042542	response to hydrogen peroxide	P	0.45094277757857365	0.016145515010240735	5	2.934579439252336	Over	P04247,P11087,P23927,P04919,P14602	Mb,Col1a1,Cryab,Slc4a1,Hspb1
GO:0030388	fructose 1,6-bisphosphate metabolic process	P	0.45094277757857365	0.016913937620556797	3	4.401869158878504	Over	P47857,Q91Y97,P05064	Pfkm,Aldob,Aldoa
GO:0070330	aromatase activity	F	0.45094277757857365	0.016913937620556797	3	4.401869158878504	Over	Q8CIM7,P11714,P24456	Cyp2d26,Cyp2d9,Cyp2d10
GO:0017022	myosin binding	F	0.45094277757857365	0.016913937620556797	3	4.401869158878504	Over	P63001,P60710,P68134	Rac1,Actb,Acta1
GO:0070061	fructose binding	F	0.45094277757857365	0.016913937620556797	3	4.401869158878504	Over	P47857,Q91Y97,P05064	Pfkm,Aldob,Aldoa
GO:0006941	striated muscle contraction	P	0.45094277757857365	0.016913937620556797	3	4.401869158878504	Over	Q91Y97,P05064,Q8BHN3	Aldob,Aldoa,Ganab
GO:0005522	profilin binding	F	0.45094277757857365	0.016913937620556797	3	4.401869158878504	Over	P63001,P60710,P68134	Rac1,Actb,Acta1
GO:0042168	heme metabolic process	P	0.45094277757857365	0.016913937620556797	3	4.401869158878504	Over	P33267,Q8CIM7,P24456	Cyp2f2,Cyp2d26,Cyp2d10
GO:0031430	M band	C	0.4530969940775088	0.018441556235567327	4	3.3538050734312415	Over	Q91Y97,P23927,P05064,P14602	Aldob,Cryab,Aldoa,Hspb1
GO:0002026	regulation of the force of heart contraction	P	0.4530969940775088	0.018441556235567327	4	3.3538050734312415	Over	Q60605,O55143,P09542,Q8VDD5	Myl6,Atp2a2,Myl3,Myh9
GO:0005739	mitochondrion	C	0.4530969940775088	0.024562712805883714	14	1.7482600914694768	Over	P0CG50,Q6P069,P09528,Q91Y97,P23927,P49817,O55143,Q8R0Y6,P29391,P05064,Q8CFX1,P14602,Q8CAY6,Q8BMF4	Ubc,Sri,Fth1,Aldob,Cryab,Cav1,Atp2a2,Aldh1l1,Ftl1,Aldoa,H6pd,Hspb1,Acat2,Dlat
GO:0001867	complement activation, lectin pathway	P	0.4530969940775088	0.025632763157232282	5	2.6677994902293967	Over	Q8CG16,Q8CG14,P41317,Q91WP0,P98064	C1ra,C1sa,Mbl2,Masp2,Masp1
GO:0071682	endocytic vesicle lumen	C	0.4530969940775088	0.028804640437222428	2	5.869158878504671	Over	P09528,P29391	Fth1,Ftl1
GO:0006880	intracellular sequestering of iron ion	P	0.4530969940775088	0.028804640437222428	2	5.869158878504671	Over	P09528,P29391	Fth1,Ftl1
GO:0035267	NuA4 histone acetyltransferase complex	C	0.4530969940775088	0.028804640437222428	2	5.869158878504671	Over	P60710,P68134	Actb,Acta1
GO:0006942	regulation of striated muscle contraction	P	0.4530969940775088	0.028804640437222428	2	5.869158878504671	Over	Q60605,P09542	Myl6,Myl3
GO:0035606	peptidyl-cysteine S-trans-nitrosylation	P	0.4530969940775088	0.028804640437222428	2	5.869158878504671	Over	P31725,P16858	S100a9,Gapdh
GO:0098973	structural constituent of postsynaptic actin cytoskeleton	F	0.4530969940775088	0.028804640437222428	2	5.869158878504671	Over	P60710,P68134	Actb,Acta1
GO:0033017	sarcoplasmic reticulum membrane	C	0.4530969940775088	0.028804640437222428	2	5.869158878504671	Over	Q6P069,O55143	Sri,Atp2a2
GO:0022898	regulation of transmembrane transporter activity	P	0.4530969940775088	0.028804640437222428	2	5.869158878504671	Over	P60710,P68134	Actb,Acta1
GO:0098909	regulation of cardiac muscle cell action potential involved in regulation of contraction	P	0.4530969940775088	0.028804640437222428	2	5.869158878504671	Over	P49817,O55143	Cav1,Atp2a2
GO:0030473	nuclear migration along microtubule	P	0.4530969940775088	0.028804640437222428	2	5.869158878504671	Over	P60710,P68134	Actb,Acta1
GO:0030492	hemoglobin binding	F	0.4530969940775088	0.028804640437222428	2	5.869158878504671	Over	Q61646,P04919	Hp,Slc4a1
GO:0019894	kinesin binding	F	0.4530969940775088	0.028804640437222428	2	5.869158878504671	Over	P60710,P68134	Actb,Acta1
GO:0106006	microtubule cortical anchor activity	F	0.4530969940775088	0.028804640437222428	2	5.869158878504671	Over	P60710,P68134	Actb,Acta1
GO:0033275	actin-myosin filament sliding	P	0.4530969940775088	0.028804640437222428	2	5.869158878504671	Over	P60710,P68134	Actb,Acta1
GO:0030957	Tat protein binding	F	0.4530969940775088	0.028804640437222428	2	5.869158878504671	Over	P60710,P68134	Actb,Acta1
GO:0090131	mesenchyme migration	P	0.4530969940775088	0.028804640437222428	2	5.869158878504671	Over	P60710,P68134	Actb,Acta1
GO:1901844	regulation of cell communication by electrical coupling involved in cardiac conduction	P	0.4530969940775088	0.028804640437222428	2	5.869158878504671	Over	Q6P069,P49817	Sri,Cav1
GO:0016461	unconventional myosin complex	C	0.4530969940775088	0.028804640437222428	2	5.869158878504671	Over	Q60605,P09542	Myl6,Myl3
GO:0072749	cellular response to cytochalasin B	P	0.4530969940775088	0.028804640437222428	2	5.869158878504671	Over	P60710,P68134	Actb,Acta1
GO:0006559	L-phenylalanine catabolic process	P	0.4530969940775088	0.028804640437222428	2	5.869158878504671	Over	P49429,O09173	Hpd,Hgd
GO:0006572	tyrosine catabolic process	P	0.4530969940775088	0.028804640437222428	2	5.869158878504671	Over	P49429,O09173	Hpd,Hgd
GO:0006116	NADH oxidation	P	0.4530969940775088	0.028804640437222428	2	5.869158878504671	Over	Q91Y97,P05064	Aldob,Aldoa
GO:0004332	fructose-bisphosphate aldolase activity	F	0.4530969940775088	0.028804640437222428	2	5.869158878504671	Over	Q91Y97,P05064	Aldob,Aldoa
GO:0051621	regulation of norepinephrine uptake	P	0.4530969940775088	0.028804640437222428	2	5.869158878504671	Over	P60710,P68134	Actb,Acta1
GO:2000491	positive regulation of hepatic stellate cell activation	P	0.4530969940775088	0.028804640437222428	2	5.869158878504671	Over	P60710,P68134	Actb,Acta1
GO:0061624	fructose catabolic process to hydroxyacetone phosphate and glyceraldehyde-3-phosphate	P	0.4530969940775088	0.028804640437222428	2	5.869158878504671	Over	Q91Y97,P05064	Aldob,Aldoa
GO:0061625	glycolytic process through fructose-1-phosphate	P	0.4530969940775088	0.028804640437222428	2	5.869158878504671	Over	Q91Y97,P05064	Aldob,Aldoa
GO:1904234	positive regulation of aconitate hydratase activity	P	0.4530969940775088	0.028804640437222428	2	5.869158878504671	Over	P09528,P29391	Fth1,Ftl1
GO:0042643	actomyosin, actin portion	C	0.4530969940775088	0.028804640437222428	2	5.869158878504671	Over	P60710,P68134	Actb,Acta1
GO:0070072	vacuolar proton-transporting V-type ATPase complex assembly	P	0.4530969940775088	0.028804640437222428	2	5.869158878504671	Over	Q91Y97,P05064	Aldob,Aldoa
GO:0009991	response to extracellular stimulus	P	0.4530969940775088	0.028804640437222428	2	5.869158878504671	Over	P60710,P68134	Actb,Acta1
GO:0008043	intracellular ferritin complex	C	0.4530969940775088	0.028804640437222428	2	5.869158878504671	Over	P09528,P29391	Fth1,Ftl1
GO:0061615	glycolytic process through fructose-6-phosphate	P	0.4530969940775088	0.028804640437222428	2	5.869158878504671	Over	Q91Y97,P05064	Aldob,Aldoa
GO:0061870	positive regulation of hepatic stellate cell migration	P	0.4530969940775088	0.028804640437222428	2	5.869158878504671	Over	P60710,P68134	Actb,Acta1
GO:0061874	positive regulation of hepatic stellate cell contraction	P	0.4530969940775088	0.028804640437222428	2	5.869158878504671	Over	P60710,P68134	Actb,Acta1
GO:0061609	fructose-1-phosphate aldolase activity	F	0.4530969940775088	0.028804640437222428	2	5.869158878504671	Over	Q91Y97,P05064	Aldob,Aldoa
GO:0043503	skeletal muscle fiber adaptation	P	0.4530969940775088	0.028804640437222428	2	5.869158878504671	Over	P60710,P68134	Actb,Acta1
GO:0050896	response to stimulus	P	0.48907143521281593	0.03208997546193105	4	2.9345794392523357	Over	P80315,Q8CFX1,P80318,P80313	Cct4,H6pd,Cct3,Cct7
GO:0006955	immune response	P	0.48907143521281593	0.03208997546193105	4	2.9345794392523357	Over	P29788,P09528,Q61646,P29391	Vtn,Fth1,Hp,Ftl1
GO:0007519	skeletal muscle tissue development	P	0.48907143521281593	0.03208997546193105	4	2.9345794392523357	Over	P63001,Q60605,P09542,Q8VDD5	Rac1,Myl6,Myl3,Myh9
GO:0035662	Toll-like receptor 4 binding	F	0.48907143521281593	0.03705141819714071	3	3.5214953271028033	Over	P05367,P05366,P31725	Saa2,Saa1,S100a9
GO:0006012	galactose metabolic process	P	0.48907143521281593	0.03705141819714071	3	3.5214953271028033	Over	P47857,Q8BHN3,Q91ZJ5	Pfkm,Ganab,Ugp2
GO:0098974	postsynaptic actin cytoskeleton organization	P	0.48907143521281593	0.03705141819714071	3	3.5214953271028033	Over	P60710,P68134,Q8VDD5	Actb,Acta1,Myh9
GO:0071276	cellular response to cadmium ion	P	0.48907143521281593	0.03705141819714071	3	3.5214953271028033	Over	P33267,Q8CIM7,P24456	Cyp2f2,Cyp2d26,Cyp2d10
GO:0030898	actin-dependent ATPase activity	F	0.48907143521281593	0.03705141819714071	3	3.5214953271028033	Over	Q60605,P09542,Q8VDD5	Myl6,Myl3,Myh9
GO:0000242	pericentriolar material	C	0.48907143521281593	0.03705141819714071	3	3.5214953271028033	Over	P80315,P63001,P11983	Cct4,Rac1,Tcp1
GO:0061099	negative regulation of protein tyrosine kinase activity	P	0.48907143521281593	0.03705141819714071	3	3.5214953271028033	Over	Q9EQK5,P49817,P01831	Mvp,Cav1,Thy1
GO:0035686	sperm fibrous sheath	C	0.48907143521281593	0.03705141819714071	3	3.5214953271028033	Over	Q91Y97,P16858,P05064	Aldob,Gapdh,Aldoa
GO:0030018	Z disc	C	0.48907143521281593	0.03903221968344892	9	1.8865153538050734	Over	Q6P069,Q91Y97,P23927,P49817,P04919,P05064,Q8VDD5,P14602,Q9WUB3	Sri,Aldob,Cryab,Cav1,Slc4a1,Aldoa,Myh9,Hspb1,Pygm
GO:0051897	positive regulation of protein kinase B signaling	P	0.48907143521281593	0.03953793940205121	6	2.200934579439252	Over	A2BIM8,P47878,P04939,Q5FW60,B5X0G2,P11589	Mup18,Igfbp3,Mup3,Mup20,Mup17,Mup2
GO:0030195	negative regulation of blood coagulation	P	0.48907143521281593	0.0502996083394034	4	2.608515057113187	Over	P33587,Q8K0D2,Q9R098,Q91WP0	Proc,Habp2,Hgfac,Masp2
GO:0005506	iron ion binding	F	0.48907143521281593	0.0502996083394034	4	2.608515057113187	Over	P33267,Q8CIM7,P11714,P24456	Cyp2f2,Cyp2d26,Cyp2d9,Cyp2d10
GO:0051117	ATPase binding	F	0.48907143521281593	0.0502996083394034	4	2.608515057113187	Over	P63001,Q91Y97,P49817,P05064	Rac1,Aldob,Cav1,Aldoa
GO:0030162	regulation of proteolysis	P	0.48907143521281593	0.0502996083394034	4	2.608515057113187	Over	P0CG50,P01867,P01864,P01868	Ubc,Igh-3,-,Ighg1
GO:0046716	muscle cell cellular homeostasis	P	0.48907143521281593	0.0502996083394034	4	2.608515057113187	Over	P47857,Q91Y97,P49817,P05064	Pfkm,Aldob,Cav1,Aldoa
GO:0071310	cellular response to organic substance	P	0.48907143521281593	0.0502996083394034	4	2.608515057113187	Over	O70570,P47878,P23927,O55143	Pigr,Igfbp3,Cryab,Atp2a2
GO:0005515	protein binding	F	0.48907143521281593	0.052109053107713875	7	0.5405804230201672	Under	Q91WP6,Q8CG16,Q9R098,A6X935,Q8BHN3,P28653,Q8BMF4	Serpina3n,C1ra,Hgfac,Itih4,Ganab,Bgn,Dlat
GO:0006094	gluconeogenesis	P	0.48907143521281593	0.0528198661674676	6	2.0714678394722372	Over	P47857,Q91Y97,Q8R0Y6,P16858,P05064,Q8BMF4	Pfkm,Aldob,Aldh1l1,Gapdh,Aldoa,Dlat
GO:0001934	positive regulation of protein phosphorylation	P	0.48907143521281593	0.0528198661674676	6	2.0714678394722372	Over	P15702,P23927,P01867,P01878,P01864,P01868	Spn,Cryab,Igh-3,-,-,Ighg1
GO:0010628	positive regulation of gene expression	P	0.48907143521281593	0.05340900033381487	10	1.7785329934862646	Over	A2BIM8,P29788,P60710,P49817,Q8R0Y6,P68134,P04939,Q5FW60,B5X0G2,P11589	Mup18,Vtn,Actb,Cav1,Aldh1l1,Acta1,Mup3,Mup20,Mup17,Mup2
GO:0006508	proteolysis	P	0.48907143521281593	0.05506712839457914	8	1.8781308411214952	Over	P33587,Q64514,P29788,Q61646,Q8CG14,Q9Z2W0,Q91WP0,P98064	Proc,Tpp2,Vtn,Hp,C1sa,Dnpep,Masp2,Masp1
GO:0007165	signal transduction	P	0.48907143521281593	0.06269610913396577	3	0.3912772585669782	Under	P82198,P41317,Q8VDD5	Tgfbi,Mbl2,Myh9
GO:0008307	structural constituent of muscle	F	0.48907143521281593	0.06501116249686771	3	2.934579439252336	Over	Q60605,P09542,Q8VDD5	Myl6,Myl3,Myh9
GO:0008333	endosome to lysosome transport	P	0.48907143521281593	0.06501116249686771	3	2.934579439252336	Over	P01867,P01864,P01868	Igh-3,-,Ighg1
GO:0048741	skeletal muscle fiber development	P	0.48907143521281593	0.06501116249686771	3	2.934579439252336	Over	P60710,P49817,P68134	Actb,Cav1,Acta1
GO:0001788	antibody-dependent cellular cytotoxicity	P	0.48907143521281593	0.06501116249686771	3	2.934579439252336	Over	P01867,P01864,P01868	Igh-3,-,Ighg1
GO:0050998	nitric-oxide synthase binding	F	0.48907143521281593	0.06501116249686771	3	2.934579439252336	Over	P60710,P49817,P68134	Actb,Cav1,Acta1
GO:0030485	smooth muscle contractile fiber	C	0.48907143521281593	0.06501116249686771	3	2.934579439252336	Over	P60710,P68134,Q8VDD5	Actb,Acta1,Myh9
GO:0004252	serine-type endopeptidase activity	F	0.48907143521281593	0.0710169975583245	9	1.821463100225588	Over	P33587,Q64514,Q61646,Q8CG16,Q8CG14,Q8K0D2,Q9R098,Q91WP0,P98064	Proc,Tpp2,Hp,C1ra,C1sa,Habp2,Hgfac,Masp2,Masp1
GO:0031672	A band	C	0.48907143521281593	0.0730690038921706	4	2.347663551401869	Over	P31725,Q60605,P09542,Q8VDD5	S100a9,Myl6,Myl3,Myh9
GO:0009615	response to virus	P	0.48907143521281593	0.0730690038921706	4	2.347663551401869	Over	P0CG50,P60710,P68134,P14602	Ubc,Actb,Acta1,Hspb1
GO:0000132	establishment of mitotic spindle orientation	P	0.48907143521281593	0.0767510227624079	2	3.9127725856697815	Over	P60710,P68134	Actb,Acta1
GO:0061041	regulation of wound healing	P	0.48907143521281593	0.0767510227624079	2	3.9127725856697815	Over	P60710,P68134	Actb,Acta1
GO:0030868	smooth endoplasmic reticulum membrane	C	0.48907143521281593	0.0767510227624079	2	3.9127725856697815	Over	Q91Y97,P05064	Aldob,Aldoa
GO:0019242	methylglyoxal biosynthetic process	P	0.48907143521281593	0.0767510227624079	2	3.9127725856697815	Over	Q91Y97,P05064	Aldob,Aldoa
GO:0051873	killing by host of symbiont cells	P	0.48907143521281593	0.0767510227624079	2	3.9127725856697815	Over	P16858,P41317	Gapdh,Mbl2
GO:0061827	sperm head	C	0.48907143521281593	0.0767510227624079	2	3.9127725856697815	Over	Q91Y97,P05064	Aldob,Aldoa
GO:0006020	inositol metabolic process	P	0.48907143521281593	0.0767510227624079	2	3.9127725856697815	Over	Q91Y97,P05064	Aldob,Aldoa
GO:1904030	negative regulation of cyclin-dependent protein kinase activity	P	0.48907143521281593	0.0767510227624079	2	3.9127725856697815	Over	P60710,P68134	Actb,Acta1
GO:0008426	protein kinase C inhibitor activity	F	0.48907143521281593	0.0767510227624079	2	3.9127725856697815	Over	P23927,P14602	Cryab,Hspb1
GO:0044754	autolysosome	C	0.48907143521281593	0.0767510227624079	2	3.9127725856697815	Over	P09528,P29391	Fth1,Ftl1
GO:1900027	regulation of ruffle assembly	P	0.48907143521281593	0.0767510227624079	2	3.9127725856697815	Over	P63001,P49817	Rac1,Cav1
GO:0030133	transport vesicle	C	0.48907143521281593	0.0767510227624079	2	3.9127725856697815	Over	O70570,P28653	Pigr,Bgn
GO:0030137	COPI-coated vesicle	C	0.48907143521281593	0.0767510227624079	2	3.9127725856697815	Over	P60710,P68134	Actb,Acta1
GO:0007021	tubulin complex assembly	P	0.48907143521281593	0.0767510227624079	2	3.9127725856697815	Over	P23927,P14602	Cryab,Hspb1
GO:0005869	dynactin complex	C	0.48907143521281593	0.0767510227624079	2	3.9127725856697815	Over	P60710,P68134	Actb,Acta1
GO:0006814	sodium ion transport	P	0.48907143521281593	0.0767510227624079	2	3.9127725856697815	Over	O55143,P04919	Atp2a2,Slc4a1
GO:0044053	translocation of peptides or proteins into host cell cytoplasm	P	0.48907143521281593	0.0767510227624079	2	3.9127725856697815	Over	P80315,P11983	Cct4,Tcp1
GO:0006826	iron ion transport	P	0.48907143521281593	0.0767510227624079	2	3.9127725856697815	Over	P09528,P29391	Fth1,Ftl1
GO:0051290	protein heterotetramerization	P	0.48907143521281593	0.0767510227624079	2	3.9127725856697815	Over	Q91Y97,P05064	Aldob,Aldoa
GO:0097228	sperm principal piece	C	0.48907143521281593	0.0767510227624079	2	3.9127725856697815	Over	P47857,P16858	Pfkm,Gapdh
GO:1903076	regulation of protein localization to plasma membrane	P	0.48907143521281593	0.0767510227624079	2	3.9127725856697815	Over	P60710,P68134	Actb,Acta1
GO:0030867	rough endoplasmic reticulum membrane	C	0.48907143521281593	0.0767510227624079	2	3.9127725856697815	Over	Q91Y97,P05064	Aldob,Aldoa
GO:0032809	neuronal cell body membrane	C	0.48907143521281593	0.0767510227624079	2	3.9127725856697815	Over	P04919,P01831	Slc4a1,Thy1
GO:0003429	growth plate cartilage chondrocyte morphogenesis	P	0.48907143521281593	0.0767510227624079	2	3.9127725856697815	Over	Q04857,P41317	Col6a1,Mbl2
GO:0007252	I-kappaB phosphorylation	P	0.48907143521281593	0.0767510227624079	2	3.9127725856697815	Over	P05367,P05366	Saa2,Saa1
GO:1904874	positive regulation of telomerase RNA localization to Cajal body	P	0.48907143521281593	0.0767510227624079	2	3.9127725856697815	Over	P80315,P11983	Cct4,Tcp1
GO:1905274	regulation of modification of postsynaptic actin cytoskeleton	P	0.48907143521281593	0.0767510227624079	2	3.9127725856697815	Over	P63001,Q8VDD5	Rac1,Myh9
GO:0032731	positive regulation of interleukin-1 beta production	P	0.48907143521281593	0.0767510227624079	2	3.9127725856697815	Over	P23927,P14602	Cryab,Hspb1
GO:0003774	motor activity	F	0.48907143521281593	0.0767510227624079	2	3.9127725856697815	Over	Q60605,P09542	Myl6,Myl3
GO:0060561	apoptotic process involved in morphogenesis	P	0.48907143521281593	0.0767510227624079	2	3.9127725856697815	Over	P23927,P14602	Cryab,Hspb1
GO:0003785	actin monomer binding	F	0.48907143521281593	0.0767510227624079	2	3.9127725856697815	Over	Q60605,P09542	Myl6,Myl3
GO:0001502	cartilage condensation	P	0.48907143521281593	0.0767510227624079	2	3.9127725856697815	Over	P11087,P41317	Col1a1,Mbl2
GO:0030240	skeletal muscle thin filament assembly	P	0.48907143521281593	0.0767510227624079	2	3.9127725856697815	Over	P60710,P68134	Actb,Acta1
GO:0048407	platelet-derived growth factor binding	F	0.48907143521281593	0.0767510227624079	2	3.9127725856697815	Over	P11087,Q04857	Col1a1,Col6a1
GO:0090666	scaRNA localization to Cajal body	P	0.48907143521281593	0.0767510227624079	2	3.9127725856697815	Over	P80315,P11983	Cct4,Tcp1
GO:0072144	glomerular mesangial cell development	P	0.48907143521281593	0.0767510227624079	2	3.9127725856697815	Over	P60710,P68134	Actb,Acta1
GO:0008228	opsonization	P	0.48907143521281593	0.0767510227624079	2	3.9127725856697815	Over	P48759,Q61805	Ptx3,Lbp
GO:0043388	positive regulation of DNA binding	P	0.48907143521281593	0.0767510227624079	2	3.9127725856697815	Over	Q60605,P09542	Myl6,Myl3
GO:0060314	regulation of ryanodine-sensitive calcium-release channel activity	P	0.48907143521281593	0.0767510227624079	2	3.9127725856697815	Over	Q60605,P09542	Myl6,Myl3
GO:0000086	G2/M transition of mitotic cell cycle	P	0.48907143521281593	0.0767510227624079	2	3.9127725856697815	Over	Q60605,P09542	Myl6,Myl3
GO:0042592	homeostatic process	P	0.48907143521281593	0.0767510227624079	2	3.9127725856697815	Over	P98086,P41317	C1qa,Mbl2
GO:0048147	negative regulation of fibroblast proliferation	P	0.48907143521281593	0.0767510227624079	2	3.9127725856697815	Over	P09528,P29391	Fth1,Ftl1
GO:0004322	ferroxidase activity	F	0.48907143521281593	0.0767510227624079	2	3.9127725856697815	Over	P09528,P29391	Fth1,Ftl1
GO:2000109	regulation of macrophage apoptotic process	P	0.48907143521281593	0.0767510227624079	2	3.9127725856697815	Over	P80315,P11983	Cct4,Tcp1
GO:0071257	cellular response to electrical stimulus	P	0.48907143521281593	0.0767510227624079	2	3.9127725856697815	Over	P60710,P68134	Actb,Acta1
GO:0065007	biological regulation	P	0.48907143521281593	0.0767510227624079	2	3.9127725856697815	Over	Q04857,P07743	Col6a1,Bpifa2
GO:0012506	vesicle membrane	C	0.48907143521281593	0.0767510227624079	2	3.9127725856697815	Over	O55143,P80318	Atp2a2,Cct3
GO:0009897	external side of plasma membrane	C	0.48907143521281593	0.08259925722359333	6	0.5335598980458793	Under	P15702,P01749,P01754,P01867,P01864,P01868	Spn,Ighv1-61,Ighv1-62-3,Igh-3,-,Ighg1
GO:0042802	identical protein binding	F	0.48907143521281593	0.08604753086961603	24	1.3544212796549246	Over	P80315,Q64514,P48759,P31725,Q9EQK5,P29788,P09528,O09173,P60710,P11087,Q91Y97,P49817,P40124,Q8R0Y6,Q8CG14,P29391,P68134,P05064,Q9Z2W0,Q91YI0,P41317,Q9DCC4,P80313,Q91ZJ5	Cct4,Tpp2,Ptx3,S100a9,Mvp,Vtn,Fth1,Hgd,Actb,Col1a1,Aldob,Cav1,Cap1,Aldh1l1,C1sa,Ftl1,Acta1,Aldoa,Dnpep,Asl,Mbl2,Pycr3,Cct7,Ugp2
GO:0030863	cortical cytoskeleton	C	0.48907143521281593	0.09993836719286145	3	2.515353805073431	Over	P60710,P04919,P68134	Actb,Slc4a1,Acta1
GO:0031981	nuclear lumen	C	0.48907143521281593	0.09993836719286145	3	2.515353805073431	Over	P80317,P80318,P80313	Cct6a,Cct3,Cct7
GO:0045022	early endosome to late endosome transport	P	0.48907143521281593	0.09993836719286145	3	2.515353805073431	Over	P01867,P01864,P01868	Igh-3,-,Ighg1
GO:0032091	negative regulation of protein binding	P	0.48907143521281593	0.09993836719286145	3	2.515353805073431	Over	P60710,P49817,P68134	Actb,Cav1,Acta1
GO:0055003	cardiac myofibril assembly	P	0.48907143521281593	0.09993836719286145	3	2.515353805073431	Over	P60710,P68134,Q8VDD5	Actb,Acta1,Myh9
GO:0006805	xenobiotic metabolic process	P	0.48907143521281593	0.09993836719286145	3	2.515353805073431	Over	Q8CIM7,P11714,P24456	Cyp2d26,Cyp2d9,Cyp2d10
GO:0015629	actin cytoskeleton	C	0.48907143521281593	0.09993836719286145	3	2.515353805073431	Over	Q91Y97,P05064,P14602	Aldob,Aldoa,Hspb1
GO:0001812	positive regulation of type I hypersensitivity	P	0.48907143521281593	0.09993836719286145	3	2.515353805073431	Over	P01867,P01864,P01868	Igh-3,-,Ighg1
GO:0015630	microtubule cytoskeleton	C	0.48907143521281593	0.09993836719286145	3	2.515353805073431	Over	Q60605,P23927,P16858	Myl6,Cryab,Gapdh
GO:0005929	cilium	C	0.48907143521281593	0.09993836719286145	3	2.515353805073431	Over	P80315,P42932,P49817	Cct4,Cct8,Cav1
GO:0051094	positive regulation of developmental process	P	0.48907143521281593	0.10017542716927717	4	2.134239592183517	Over	P0CG50,Q6P069,P23927,P28653	Ubc,Sri,Cryab,Bgn
GO:0036464	cytoplasmic ribonucleoprotein granule	C	0.48907143521281593	0.10017542716927717	4	2.134239592183517	Over	P63001,P99024,P60710,P68134	Rac1,Tubb5,Actb,Acta1
GO:0022625	cytosolic large ribosomal subunit	C	0.48907143521281593	0.10017542716927717	4	2.134239592183517	Over	P47963,P62889,P0CG50,P61358	Rpl13,Rpl30,Ubc,Rpl27
GO:0008285	negative regulation of cell population proliferation	P	0.48907143521281593	0.10020593508242687	1	0.24454828660436134	Under	P39876	Timp3
GO:0043231	intracellular membrane-bounded organelle	C	0.48907143521281593	0.10020593508242687	1	0.24454828660436134	Under	P41317	Mbl2
GO:0045892	negative regulation of transcription, DNA-templated	P	0.48907143521281593	0.12959785558157452	6	1.7607476635514017	Over	A2BIM8,P23927,P04939,Q5FW60,B5X0G2,P11589	Mup18,Cryab,Mup3,Mup20,Mup17,Mup2
GO:0005874	microtubule	C	0.48907143521281593	0.12959785558157452	6	1.7607476635514017	Over	P80317,P80315,P42932,P80318,P80313,P11983	Cct6a,Cct4,Cct8,Cct3,Cct7,Tcp1
GO:0048522	positive regulation of cellular process	P	0.48907143521281593	0.13015009503741737	8	1.6190783113116336	Over	O70570,Q60605,P01029,Q8K0D2,Q9R098,P09542,Q91WP0,P39876	Pigr,Myl6,C4b,Habp2,Hgfac,Myl3,Masp2,Timp3
GO:0030246	carbohydrate binding	F	0.48907143521281593	0.1312248026168246	4	1.9563862928348907	Over	P01029,Q8CFX1,Q8BHN3,Q9WUB3	C4b,H6pd,Ganab,Pygm
GO:0051172	negative regulation of nitrogen compound metabolic process	P	0.48907143521281593	0.13658810790416123	2	2.9345794392523357	Over	P33587,Q6P069	Proc,Sri
GO:0051281	positive regulation of release of sequestered calcium ion into cytosol	P	0.48907143521281593	0.13658810790416123	2	2.9345794392523357	Over	Q6P069,P01831	Sri,Thy1
GO:0030049	muscle filament sliding	P	0.48907143521281593	0.13658810790416123	2	2.9345794392523357	Over	Q60605,P09542	Myl6,Myl3
GO:0030020	extracellular matrix structural constituent conferring tensile strength	F	0.48907143521281593	0.13658810790416123	2	2.9345794392523357	Over	P11087,Q04857	Col1a1,Col6a1
GO:2001240	negative regulation of extrinsic apoptotic signaling pathway in absence of ligand	P	0.48907143521281593	0.13658810790416123	2	2.9345794392523357	Over	Q9Z126,P11087	Pf4,Col1a1
GO:0000079	regulation of cyclin-dependent protein serine/threonine kinase activity	P	0.48907143521281593	0.13658810790416123	2	2.9345794392523357	Over	P60710,P68134	Actb,Acta1
GO:0097433	dense body	C	0.48907143521281593	0.13658810790416123	2	2.9345794392523357	Over	P60710,P68134	Actb,Acta1
GO:0032982	myosin filament	C	0.48907143521281593	0.13658810790416123	2	2.9345794392523357	Over	P60710,P68134	Actb,Acta1
GO:0050661	NADP binding	F	0.48907143521281593	0.13658810790416123	2	2.9345794392523357	Over	P16858,Q8CFX1	Gapdh,H6pd
GO:0010226	response to lithium ion	P	0.48907143521281593	0.13658810790416123	2	2.9345794392523357	Over	P60710,P68134	Actb,Acta1
GO:0001849	complement component C1q binding	F	0.48907143521281593	0.13658810790416123	2	2.9345794392523357	Over	P48759,P01029	Ptx3,C4b
GO:0060255	regulation of macromolecule metabolic process	P	0.48907143521281593	0.13658810790416123	2	2.9345794392523357	Over	A2AN08,Q91WP0	Ubr4,Masp2
GO:0090023	positive regulation of neutrophil chemotaxis	P	0.48907143521281593	0.13658810790416123	2	2.9345794392523357	Over	P63001,Q61805	Rac1,Lbp
GO:2001244	positive regulation of intrinsic apoptotic signaling pathway	P	0.48907143521281593	0.13658810790416123	2	2.9345794392523357	Over	P31725,P49817	S100a9,Cav1
GO:0055008	cardiac muscle tissue morphogenesis	P	0.48907143521281593	0.13658810790416123	2	2.9345794392523357	Over	P60710,P68134	Actb,Acta1
GO:0009612	response to mechanical stimulus	P	0.48907143521281593	0.13658810790416123	2	2.9345794392523357	Over	P60710,P68134	Actb,Acta1
GO:0048545	response to steroid hormone	P	0.48907143521281593	0.13658810790416123	2	2.9345794392523357	Over	P60710,P68134	Actb,Acta1
GO:0005096	GTPase activator activity	F	0.48907143521281593	0.13658810790416123	2	2.9345794392523357	Over	P17742,P01831	Ppia,Thy1
GO:0008199	ferric iron binding	F	0.48907143521281593	0.13658810790416123	2	2.9345794392523357	Over	P09528,P29391	Fth1,Ftl1
GO:0014898	cardiac muscle hypertrophy in response to stress	P	0.48907143521281593	0.13658810790416123	2	2.9345794392523357	Over	O55143,Q8VDD5	Atp2a2,Myh9
GO:0048662	negative regulation of smooth muscle cell proliferation	P	0.48907143521281593	0.13658810790416123	2	2.9345794392523357	Over	P47878,P49817	Igfbp3,Cav1
GO:0005985	sucrose metabolic process	P	0.48907143521281593	0.13658810790416123	2	2.9345794392523357	Over	Q8BHN3,Q91ZJ5	Ganab,Ugp2
GO:0031323	regulation of cellular metabolic process	P	0.48907143521281593	0.13658810790416123	2	2.9345794392523357	Over	Q8K0D2,Q9R098	Habp2,Hgfac
GO:0005982	starch metabolic process	P	0.48907143521281593	0.13658810790416123	2	2.9345794392523357	Over	Q8BHN3,Q91ZJ5	Ganab,Ugp2
GO:0005980	glycogen catabolic process	P	0.48907143521281593	0.13658810790416123	2	2.9345794392523357	Over	P47857,Q9WUB3	Pfkm,Pygm
GO:0014829	vascular smooth muscle contraction	P	0.48907143521281593	0.13658810790416123	2	2.9345794392523357	Over	P60710,P68134	Actb,Acta1
GO:0061077	chaperone-mediated protein folding	P	0.48907143521281593	0.13658810790416123	2	2.9345794392523357	Over	P17742,P14602	Ppia,Hspb1
GO:0050789	regulation of biological process	P	0.48907143521281593	0.13658810790416123	2	2.9345794392523357	Over	Q8CFX1,Q8BHN3	H6pd,Ganab
GO:0050840	extracellular matrix binding	F	0.48907143521281593	0.13658810790416123	2	2.9345794392523357	Over	P82198,P28653	Tgfbi,Bgn
GO:0006006	glucose metabolic process	P	0.48907143521281593	0.13658810790416123	2	2.9345794392523357	Over	Q8CFX1,Q8BHN3	H6pd,Ganab
GO:0042904	9-cis-retinoic acid biosynthetic process	P	0.48907143521281593	0.13658810790416123	2	2.9345794392523357	Over	O88451,Q8R0Y6	Rdh7,Aldh1l1
GO:0006013	mannose metabolic process	P	0.48907143521281593	0.14064740223149885	3	2.200934579439252	Over	P47857,Q91Y97,P05064	Pfkm,Aldob,Aldoa
GO:0006412	translation	P	0.48907143521281593	0.14064740223149885	3	2.200934579439252	Over	P47963,P0CG50,P61358	Rpl13,Ubc,Rpl27
GO:0008217	regulation of blood pressure	P	0.48907143521281593	0.14064740223149885	3	2.200934579439252	Over	P60710,P68134,Q8VDD5	Actb,Acta1,Myh9
GO:0032154	cleavage furrow	C	0.48907143521281593	0.14064740223149885	3	2.200934579439252	Over	P63001,P15702,Q8VDD5	Rac1,Spn,Myh9
GO:0001568	blood vessel development	P	0.48907143521281593	0.14064740223149885	3	2.200934579439252	Over	P11087,Q8R0Y6,Q8K0D2	Col1a1,Aldh1l1,Habp2
GO:0001798	positive regulation of type IIa hypersensitivity	P	0.48907143521281593	0.14064740223149885	3	2.200934579439252	Over	P01867,P01864,P01868	Igh-3,-,Ighg1
GO:0031532	actin cytoskeleton reorganization	P	0.48907143521281593	0.14064740223149885	3	2.200934579439252	Over	P63001,P31725,Q8VDD5	Rac1,S100a9,Myh9
GO:0001525	angiogenesis	P	0.48907143521281593	0.1529397443181796	5	1.956386292834891	Over	P17742,P49817,P82198,Q8VDD5,P01831	Ppia,Cav1,Tgfbi,Myh9,Thy1
GO:0048306	calcium-dependent protein binding	F	0.48907143521281593	0.1529397443181796	5	1.956386292834891	Over	P63001,Q6P069,P41317,Q91WP0,P98064	Rac1,Sri,Mbl2,Masp2,Masp1
GO:0005813	centrosome	C	0.48907143521281593	0.15933477547179709	7	1.7118380062305294	Over	P80317,A2AN08,P42932,P60710,P68134,P80318,P80313	Cct6a,Ubr4,Cct8,Actb,Acta1,Cct3,Cct7
GO:0043005	neuron projection	C	0.48907143521281593	0.1676122269871253	5	1.8341121495327102	Over	Q60605,P0CG50,O55143,P09542,P39876	Myl6,Ubc,Atp2a2,Myl3,Timp3
GO:0060661	submandibular salivary gland formation	P	0.48907143521281593	0.17038216560497338	1	5.869158878504671	Over	P63001	Rac1
GO:0035811	negative regulation of urine volume	P	0.48907143521281593	0.17038216560497338	1	5.869158878504671	Over	P04919	Slc4a1
GO:0035821	modification of morphology or physiology of other organism	P	0.48907143521281593	0.17038216560497338	1	5.869158878504671	Over	P31725	S100a9
GO:0010558	negative regulation of macromolecule biosynthetic process	P	0.48907143521281593	0.17038216560497338	1	5.869158878504671	Over	P98086	C1qa
GO:0009972	cytidine deamination	P	0.48907143521281593	0.17038216560497338	1	5.869158878504671	Over	Q9DCC4	Pycr3
GO:0045852	pH elevation	P	0.48907143521281593	0.17038216560497338	1	5.869158878504671	Over	P04919	Slc4a1
GO:0010524	positive regulation of calcium ion transport into cytosol	P	0.48907143521281593	0.17038216560497338	1	5.869158878504671	Over	P49817	Cav1
GO:0038127	ERBB signaling pathway	P	0.48907143521281593	0.17038216560497338	1	5.869158878504671	Over	Q9EQK5	Mvp
GO:0035995	detection of muscle stretch	P	0.48907143521281593	0.17038216560497338	1	5.869158878504671	Over	P49817	Cav1
GO:0010259	multicellular organism aging	P	0.48907143521281593	0.17038216560497338	1	5.869158878504671	Over	P23927	Cryab
GO:0038009	regulation of signal transduction by receptor internalization	P	0.48907143521281593	0.17038216560497338	1	5.869158878504671	Over	P49817	Cav1
GO:0038033	positive regulation of endothelial cell chemotaxis by VEGF-activated vascular endothelial growth factor receptor signaling pathway	P	0.48907143521281593	0.17038216560497338	1	5.869158878504671	Over	P14602	Hspb1
GO:0045821	positive regulation of glycolytic process	P	0.48907143521281593	0.17038216560497338	1	5.869158878504671	Over	P16858	Gapdh
GO:0038093	Fc receptor signaling pathway	P	0.48907143521281593	0.17038216560497338	1	5.869158878504671	Over	O70570	Pigr
GO:0010037	response to carbon dioxide	P	0.48907143521281593	0.17038216560497338	1	5.869158878504671	Over	P04919	Slc4a1
GO:0061052	negative regulation of cell growth involved in cardiac muscle cell development	P	0.48907143521281593	0.17038216560497338	1	5.869158878504671	Over	P49817	Cav1
GO:0010459	negative regulation of heart rate	P	0.48907143521281593	0.17038216560497338	1	5.869158878504671	Over	Q6P069	Sri
GO:0019941	modification-dependent protein catabolic process	P	0.48907143521281593	0.17038216560497338	1	5.869158878504671	Over	P0CG50	Ubc
GO:0043569	negative regulation of insulin-like growth factor receptor signaling pathway	P	0.48907143521281593	0.17038216560497338	1	5.869158878504671	Over	P47878	Igfbp3
GO:0035605	peptidyl-cysteine S-nitrosylase activity	F	0.48907143521281593	0.17038216560497338	1	5.869158878504671	Over	P16858	Gapdh
GO:0014801	longitudinal sarcoplasmic reticulum	C	0.48907143521281593	0.17038216560497338	1	5.869158878504671	Over	O55143	Atp2a2
GO:0046386	deoxyribose phosphate catabolic process	P	0.48907143521281593	0.17038216560497338	1	5.869158878504671	Over	Q91YP3	Dera
GO:0060355	positive regulation of cell adhesion molecule production	P	0.48907143521281593	0.17038216560497338	1	5.869158878504671	Over	P49817	Cav1
GO:0010939	regulation of necrotic cell death	P	0.48907143521281593	0.17038216560497338	1	5.869158878504671	Over	P17742	Ppia
GO:0034141	positive regulation of toll-like receptor 3 signaling pathway	P	0.48907143521281593	0.17038216560497338	1	5.869158878504671	Over	P49817	Cav1
GO:0060359	response to ammonium ion	P	0.48907143521281593	0.17038216560497338	1	5.869158878504671	Over	P16858	Gapdh
GO:0034235	GPI anchor binding	F	0.48907143521281593	0.17038216560497338	1	5.869158878504671	Over	P01831	Thy1
GO:0034329	cell junction assembly	P	0.48907143521281593	0.17038216560497338	1	5.869158878504671	Over	P47754	Capza2
GO:0045797	positive regulation of intestinal cholesterol absorption	P	0.48907143521281593	0.17038216560497338	1	5.869158878504671	Over	Q8CAY6	Acat2
GO:0034389	lipid droplet organization	P	0.48907143521281593	0.17038216560497338	1	5.869158878504671	Over	P17742	Ppia
GO:0010882	regulation of cardiac muscle contraction by calcium ion signaling	P	0.48907143521281593	0.17038216560497338	1	5.869158878504671	Over	O55143	Atp2a2
GO:0010849	regulation of proton-transporting ATPase activity, rotational mechanism	P	0.48907143521281593	0.17038216560497338	1	5.869158878504671	Over	P17742	Ppia
GO:0034505	tooth mineralization	P	0.48907143521281593	0.17038216560497338	1	5.869158878504671	Over	P11087	Col1a1
GO:0046121	deoxyribonucleoside catabolic process	P	0.48907143521281593	0.17038216560497338	1	5.869158878504671	Over	Q91YP3	Dera
GO:0010831	positive regulation of myotube differentiation	P	0.48907143521281593	0.17038216560497338	1	5.869158878504671	Over	P49817	Cav1
GO:0060373	regulation of ventricular cardiac muscle cell membrane depolarization	P	0.48907143521281593	0.17038216560497338	1	5.869158878504671	Over	P49817	Cav1
GO:0060546	negative regulation of necroptotic process	P	0.48907143521281593	0.17038216560497338	1	5.869158878504671	Over	P49817	Cav1
GO:0045926	negative regulation of growth	P	0.48907143521281593	0.17038216560497338	1	5.869158878504671	Over	P47878	Igfbp3
GO:0046251	limonene catabolic process	P	0.48907143521281593	0.17038216560497338	1	5.869158878504671	Over	Q8R0Y6	Aldh1l1
GO:0042207	styrene catabolic process	P	0.48907143521281593	0.17038216560497338	1	5.869158878504671	Over	O09173	Hgd
GO:0009804	coumarin metabolic process	P	0.48907143521281593	0.17038216560497338	1	5.869158878504671	Over	P33267	Cyp2f2
GO:0061302	smooth muscle cell-matrix adhesion	P	0.48907143521281593	0.17038216560497338	1	5.869158878504671	Over	P29788	Vtn
GO:0044691	tooth eruption	P	0.48907143521281593	0.17038216560497338	1	5.869158878504671	Over	P11087	Col1a1
GO:0044615	nuclear pore nuclear basket	C	0.48907143521281593	0.17038216560497338	1	5.869158878504671	Over	P17742	Ppia
GO:0044614	nuclear pore cytoplasmic filaments	C	0.48907143521281593	0.17038216560497338	1	5.869158878504671	Over	P17742	Ppia
GO:0008389	coumarin 7-hydroxylase activity	F	0.48907143521281593	0.17038216560497338	1	5.869158878504671	Over	P33267	Cyp2f2
GO:0043130	ubiquitin binding	F	0.48907143521281593	0.17038216560497338	1	5.869158878504671	Over	P14602	Hspb1
GO:0044429	mitochondrial part	C	0.48907143521281593	0.17038216560497338	1	5.869158878504671	Over	O88451	Rdh7
GO:0044331	cell-cell adhesion mediated by cadherin	P	0.48907143521281593	0.17038216560497338	1	5.869158878504671	Over	P29788	Vtn
GO:0043014	alpha-tubulin binding	F	0.48907143521281593	0.17038216560497338	1	5.869158878504671	Over	P49817	Cav1
GO:0044326	dendritic spine neck	C	0.48907143521281593	0.17038216560497338	1	5.869158878504671	Over	Q6P069	Sri
GO:0043353	enucleate erythrocyte differentiation	P	0.48907143521281593	0.17038216560497338	1	5.869158878504671	Over	P04247	Mb
GO:0043408	regulation of MAPK cascade	P	0.48907143521281593	0.17038216560497338	1	5.869158878504671	Over	P98086	C1qa
GO:0044216	other organism cell	C	0.48907143521281593	0.17038216560497338	1	5.869158878504671	Over	P01029	C4b
GO:0044057	regulation of system process	P	0.48907143521281593	0.17038216560497338	1	5.869158878504671	Over	P31725	S100a9
GO:0061975	articular cartilage development	P	0.48907143521281593	0.17038216560497338	1	5.869158878504671	Over	P28653	Bgn
GO:0043666	regulation of phosphoprotein phosphatase activity	P	0.48907143521281593	0.17038216560497338	1	5.869158878504671	Over	P47878	Igfbp3
GO:0043568	positive regulation of insulin-like growth factor receptor signaling pathway	P	0.48907143521281593	0.17038216560497338	1	5.869158878504671	Over	P47878	Igfbp3
GO:0008290	F-actin capping protein complex	C	0.48907143521281593	0.17038216560497338	1	5.869158878504671	Over	P47754	Capza2
GO:0008536	Ran GTPase binding	F	0.48907143521281593	0.17038216560497338	1	5.869158878504671	Over	P17742	Ppia
GO:0061831	apical ectoplasmic specialization	C	0.48907143521281593	0.17038216560497338	1	5.869158878504671	Over	O55143	Atp2a2
GO:0008898	S-adenosylmethionine-homocysteine S-methyltransferase activity	F	0.48907143521281593	0.17038216560497338	1	5.869158878504671	Over	O35490	Bhmt
GO:0045651	positive regulation of macrophage differentiation	P	0.48907143521281593	0.17038216560497338	1	5.869158878504671	Over	Q9Z126	Pf4
GO:0014819	regulation of skeletal muscle contraction	P	0.48907143521281593	0.17038216560497338	1	5.869158878504671	Over	P49817	Cav1
GO:0042405	nuclear inclusion body	C	0.48907143521281593	0.17038216560497338	1	5.869158878504671	Over	P17742	Ppia
GO:0042450	arginine biosynthetic process via ornithine	P	0.48907143521281593	0.17038216560497338	1	5.869158878504671	Over	Q91YI0	Asl
GO:0045409	negative regulation of interleukin-6 biosynthetic process	P	0.48907143521281593	0.17038216560497338	1	5.869158878504671	Over	P29788	Vtn
GO:0045347	negative regulation of MHC class II biosynthetic process	P	0.48907143521281593	0.17038216560497338	1	5.869158878504671	Over	Q9Z126	Pf4
GO:0042532	negative regulation of tyrosine phosphorylation of STAT protein	P	0.48907143521281593	0.17038216560497338	1	5.869158878504671	Over	P49817	Cav1
GO:0042568	insulin-like growth factor binary complex	C	0.48907143521281593	0.17038216560497338	1	5.869158878504671	Over	P47878	Igfbp3
GO:0045254	pyruvate dehydrogenase complex	C	0.48907143521281593	0.17038216560497338	1	5.869158878504671	Over	Q8BMF4	Dlat
GO:0045116	protein neddylation	P	0.48907143521281593	0.17038216560497338	1	5.869158878504671	Over	P0CG50	Ubc
GO:0061627	S-methylmethionine-homocysteine S-methyltransferase activity	F	0.48907143521281593	0.17038216560497338	1	5.869158878504671	Over	O35490	Bhmt
GO:0045060	negative thymic T cell selection	P	0.48907143521281593	0.17038216560497338	1	5.869158878504671	Over	P15702	Spn
GO:0009264	deoxyribonucleotide catabolic process	P	0.48907143521281593	0.17038216560497338	1	5.869158878504671	Over	Q91YP3	Dera
GO:0045055	regulated exocytosis	P	0.48907143521281593	0.17038216560497338	1	5.869158878504671	Over	Q8VDD5	Myh9
GO:0009258	10-formyltetrahydrofolate catabolic process	P	0.48907143521281593	0.17038216560497338	1	5.869158878504671	Over	Q8R0Y6	Aldh1l1
GO:0009117	nucleotide metabolic process	P	0.48907143521281593	0.17038216560497338	1	5.869158878504671	Over	Q91ZJ5	Ugp2
GO:0045019	negative regulation of nitric oxide biosynthetic process	P	0.48907143521281593	0.17038216560497338	1	5.869158878504671	Over	P49817	Cav1
GO:0045663	positive regulation of myoblast differentiation	P	0.48907143521281593	0.17038216560497338	1	5.869158878504671	Over	P47878	Igfbp3
GO:0060315	negative regulation of ryanodine-sensitive calcium-release channel activity	P	0.48907143521281593	0.17038216560497338	1	5.869158878504671	Over	Q6P069	Sri
GO:0033919	glucan 1,3-alpha-glucosidase activity	F	0.48907143521281593	0.17038216560497338	1	5.869158878504671	Over	Q8BHN3	Ganab
GO:0021888	hypothalamus gonadotrophin-releasing hormone neuron development	P	0.48907143521281593	0.17038216560497338	1	5.869158878504671	Over	P0CG50	Ubc
GO:0019260	1,2-dichloroethane catabolic process	P	0.48907143521281593	0.17038216560497338	1	5.869158878504671	Over	Q8R0Y6	Aldh1l1
GO:0048592	eye morphogenesis	P	0.48907143521281593	0.17038216560497338	1	5.869158878504671	Over	P04919	Slc4a1
GO:0019255	glucose 1-phosphate metabolic process	P	0.48907143521281593	0.17038216560497338	1	5.869158878504671	Over	Q91ZJ5	Ugp2
GO:0048550	negative regulation of pinocytosis	P	0.48907143521281593	0.17038216560497338	1	5.869158878504671	Over	P49817	Cav1
GO:0031775	lutropin-choriogonadotropic hormone receptor binding	F	0.48907143521281593	0.17038216560497338	1	5.869158878504671	Over	O55143	Atp2a2
GO:0019228	neuronal action potential	P	0.48907143521281593	0.17038216560497338	1	5.869158878504671	Over	Q8VDD5	Myh9
GO:0019217	regulation of fatty acid metabolic process	P	0.48907143521281593	0.17038216560497338	1	5.869158878504671	Over	P49817	Cav1
GO:0019065	receptor-mediated endocytosis of virus by host cell	P	0.48907143521281593	0.17038216560497338	1	5.869158878504671	Over	P49817	Cav1
GO:0048248	CXCR3 chemokine receptor binding	F	0.48907143521281593	0.17038216560497338	1	5.869158878504671	Over	Q9Z126	Pf4
GO:0032269	negative regulation of cellular protein metabolic process	P	0.48907143521281593	0.17038216560497338	1	5.869158878504671	Over	O70570	Pigr
GO:0032387	negative regulation of intracellular transport	P	0.48907143521281593	0.17038216560497338	1	5.869158878504671	Over	P23927	Cryab
GO:0018979	trichloroethylene metabolic process	P	0.48907143521281593	0.17038216560497338	1	5.869158878504671	Over	P33267	Cyp2f2
GO:0018931	naphthalene metabolic process	P	0.48907143521281593	0.17038216560497338	1	5.869158878504671	Over	P33267	Cyp2f2
GO:0018549	methanethiol oxidase activity	F	0.48907143521281593	0.17038216560497338	1	5.869158878504671	Over	Q63836	Selenbp2
GO:0017177	glucosidase II complex	C	0.48907143521281593	0.17038216560497338	1	5.869158878504671	Over	Q8BHN3	Ganab
GO:0047936	glucose 1-dehydrogenase [NAD(P)] activity	F	0.48907143521281593	0.17038216560497338	1	5.869158878504671	Over	Q8CFX1	H6pd
GO:0032432	actin filament bundle	C	0.48907143521281593	0.17038216560497338	1	5.869158878504671	Over	P23927	Cryab
GO:0031444	slow-twitch skeletal muscle fiber contraction	P	0.48907143521281593	0.17038216560497338	1	5.869158878504671	Over	P04247	Mb
GO:0031386	protein tag	F	0.48907143521281593	0.17038216560497338	1	5.869158878504671	Over	P0CG50	Ubc
GO:0052501	positive regulation by organism of apoptotic process in other organism involved in symbiotic interaction	P	0.48907143521281593	0.17038216560497338	1	5.869158878504671	Over	P16858	Gapdh
GO:0031327	negative regulation of cellular biosynthetic process	P	0.48907143521281593	0.17038216560497338	1	5.869158878504671	Over	P98086	C1qa
GO:0051394	regulation of nerve growth factor receptor activity	P	0.48907143521281593	0.17038216560497338	1	5.869158878504671	Over	P49817	Cav1
GO:0030004	cellular monovalent inorganic cation homeostasis	P	0.48907143521281593	0.17038216560497338	1	5.869158878504671	Over	O55143	Atp2a2
GO:0030048	actin filament-based movement	P	0.48907143521281593	0.17038216560497338	1	5.869158878504671	Over	Q8VDD5	Myh9
GO:0019933	cAMP-mediated signaling	P	0.48907143521281593	0.17038216560497338	1	5.869158878504671	Over	P16858	Gapdh
GO:0051647	nucleus localization	P	0.48907143521281593	0.17038216560497338	1	5.869158878504671	Over	P49817	Cav1
GO:0051045	negative regulation of membrane protein ectodomain proteolysis	P	0.48907143521281593	0.17038216560497338	1	5.869158878504671	Over	P39876	Timp3
GO:0030241	skeletal muscle myosin thick filament assembly	P	0.48907143521281593	0.17038216560497338	1	5.869158878504671	Over	Q8VDD5	Myh9
GO:0030665	clathrin-coated vesicle membrane	C	0.48907143521281593	0.17038216560497338	1	5.869158878504671	Over	Q9JM62	Reep6
GO:0017121	plasma membrane phospholipid scrambling	P	0.48907143521281593	0.17038216560497338	1	5.869158878504671	Over	P04919	Slc4a1
GO:0051896	regulation of protein kinase B signaling	P	0.48907143521281593	0.17038216560497338	1	5.869158878504671	Over	P49817	Cav1
GO:0050771	negative regulation of axonogenesis	P	0.48907143521281593	0.17038216560497338	1	5.869158878504671	Over	P01831	Thy1
GO:0050688	regulation of defense response to virus	P	0.48907143521281593	0.17038216560497338	1	5.869158878504671	Over	P15702	Spn
GO:0019852	L-ascorbic acid metabolic process	P	0.48907143521281593	0.17038216560497338	1	5.869158878504671	Over	Q8R0Y6	Aldh1l1
GO:0019828	aspartic-type endopeptidase inhibitor activity	F	0.48907143521281593	0.17038216560497338	1	5.869158878504671	Over	P16858	Gapdh
GO:0019789	SUMO transferase activity	F	0.48907143521281593	0.17038216560497338	1	5.869158878504671	Over	P17742	Ppia
GO:0019439	aromatic compound catabolic process	P	0.48907143521281593	0.17038216560497338	1	5.869158878504671	Over	Q8CAY6	Acat2
GO:0050662	coenzyme binding	F	0.48907143521281593	0.17038216560497338	1	5.869158878504671	Over	Q8CAY6	Acat2
GO:0031109	microtubule polymerization or depolymerization	P	0.48907143521281593	0.17038216560497338	1	5.869158878504671	Over	P23927	Cryab
GO:0030857	negative regulation of epithelial cell differentiation	P	0.48907143521281593	0.17038216560497338	1	5.869158878504671	Over	P49817	Cav1
GO:0046452	dihydrofolate metabolic process	P	0.48907143521281593	0.17038216560497338	1	5.869158878504671	Over	Q9CWJ9	Atic
GO:0047497	mitochondrion transport along microtubule	P	0.48907143521281593	0.17038216560497338	1	5.869158878504671	Over	P0CG50	Ubc
GO:0032470	positive regulation of endoplasmic reticulum calcium ion concentration	P	0.48907143521281593	0.17038216560497338	1	5.869158878504671	Over	O55143	Atp2a2
GO:0046907	intracellular transport	P	0.48907143521281593	0.17038216560497338	1	5.869158878504671	Over	Q6P069	Sri
GO:0015780	nucleotide-sugar transmembrane transport	P	0.48907143521281593	0.17038216560497338	1	5.869158878504671	Over	O55143	Atp2a2
GO:0015701	bicarbonate transport	P	0.48907143521281593	0.17038216560497338	1	5.869158878504671	Over	P04919	Slc4a1
GO:0060307	regulation of ventricular cardiac muscle cell membrane repolarization	P	0.48907143521281593	0.17038216560497338	1	5.869158878504671	Over	P49817	Cav1
GO:0033007	negative regulation of mast cell activation involved in immune response	P	0.48907143521281593	0.17038216560497338	1	5.869158878504671	Over	O70570	Pigr
GO:0033133	positive regulation of glucokinase activity	P	0.48907143521281593	0.17038216560497338	1	5.869158878504671	Over	P17742	Ppia
GO:0046654	tetrahydrofolate biosynthetic process	P	0.48907143521281593	0.17038216560497338	1	5.869158878504671	Over	Q9CWJ9	Atic
GO:0015301	anion:anion antiporter activity	F	0.48907143521281593	0.17038216560497338	1	5.869158878504671	Over	P04919	Slc4a1
GO:0015108	chloride transmembrane transporter activity	F	0.48907143521281593	0.17038216560497338	1	5.869158878504671	Over	P04919	Slc4a1
GO:0015106	bicarbonate transmembrane transporter activity	F	0.48907143521281593	0.17038216560497338	1	5.869158878504671	Over	P04919	Slc4a1
GO:0015081	sodium ion transmembrane transporter activity	F	0.48907143521281593	0.17038216560497338	1	5.869158878504671	Over	P04919	Slc4a1
GO:0033292	T-tubule organization	P	0.48907143521281593	0.17038216560497338	1	5.869158878504671	Over	O55143	Atp2a2
GO:0033477	S-methylmethionine metabolic process	P	0.48907143521281593	0.17038216560497338	1	5.869158878504671	Over	O35490	Bhmt
GO:0033484	nitric oxide homeostasis	P	0.48907143521281593	0.17038216560497338	1	5.869158878504671	Over	P49817	Cav1
GO:0033612	receptor serine/threonine kinase binding	F	0.48907143521281593	0.17038216560497338	1	5.869158878504671	Over	P49817	Cav1
GO:0046540	U4/U6 x U5 tri-snRNP complex	C	0.48907143521281593	0.17038216560497338	1	5.869158878504671	Over	P17742	Ppia
GO:0033721	aldehyde dehydrogenase (NADP+) activity	F	0.48907143521281593	0.17038216560497338	1	5.869158878504671	Over	Q8R0Y6	Aldh1l1
GO:0015920	lipopolysaccharide transport	P	0.48907143521281593	0.17038216560497338	1	5.869158878504671	Over	Q61805	Lbp
GO:0015936	coenzyme A metabolic process	P	0.48907143521281593	0.17038216560497338	1	5.869158878504671	Over	Q8CAY6	Acat2
GO:0060299	negative regulation of sarcomere organization	P	0.48907143521281593	0.17038216560497338	1	5.869158878504671	Over	P49817	Cav1
GO:0016010	dystrophin-associated glycoprotein complex	C	0.48907143521281593	0.17038216560497338	1	5.869158878504671	Over	P49817	Cav1
GO:0032490	detection of molecule of bacterial origin	P	0.48907143521281593	0.17038216560497338	1	5.869158878504671	Over	Q61805	Lbp
GO:0016925	protein sumoylation	P	0.48907143521281593	0.17038216560497338	1	5.869158878504671	Over	P17742	Ppia
GO:0016742	hydroxymethyl-, formyl- and related transferase activity	F	0.48907143521281593	0.17038216560497338	1	5.869158878504671	Over	Q8R0Y6	Aldh1l1
GO:0016712	oxidoreductase activity, acting on paired donors, with incorporation or reduction of molecular oxygen, reduced flavin or flavoprotein as one donor, and incorporation of one atom of oxygen	F	0.48907143521281593	0.17038216560497338	1	5.869158878504671	Over	P33267	Cyp2f2
GO:0047150	betaine-homocysteine S-methyltransferase activity	F	0.48907143521281593	0.17038216560497338	1	5.869158878504671	Over	O35490	Bhmt
GO:0032557	pyrimidine ribonucleotide binding	F	0.48907143521281593	0.17038216560497338	1	5.869158878504671	Over	Q91ZJ5	Ugp2
GO:0047044	androstan-3-alpha,17-beta-diol dehydrogenase activity	F	0.48907143521281593	0.17038216560497338	1	5.869158878504671	Over	O88451	Rdh7
GO:0055119	relaxation of cardiac muscle	P	0.48907143521281593	0.17038216560497338	1	5.869158878504671	Over	O55143	Atp2a2
GO:0017057	6-phosphogluconolactonase activity	F	0.48907143521281593	0.17038216560497338	1	5.869158878504671	Over	Q8CFX1	H6pd
GO:0055129	L-proline biosynthetic process	P	0.48907143521281593	0.17038216560497338	1	5.869158878504671	Over	Q9DCC4	Pycr3
GO:0032609	interferon-gamma production	P	0.48907143521281593	0.17038216560497338	1	5.869158878504671	Over	P15702	Spn
GO:0016307	phosphatidylinositol phosphate kinase activity	F	0.48907143521281593	0.17038216560497338	1	5.869158878504671	Over	P80318	Cct3
GO:0016155	formyltetrahydrofolate dehydrogenase activity	F	0.48907143521281593	0.17038216560497338	1	5.869158878504671	Over	Q8R0Y6	Aldh1l1
GO:0047035	testosterone dehydrogenase (NAD+) activity	F	0.48907143521281593	0.17038216560497338	1	5.869158878504671	Over	O88451	Rdh7
GO:0060265	positive regulation of respiratory burst involved in inflammatory response	P	0.48907143521281593	0.17038216560497338	1	5.869158878504671	Over	Q61805	Lbp
GO:0047023	androsterone dehydrogenase activity	F	0.48907143521281593	0.17038216560497338	1	5.869158878504671	Over	O88451	Rdh7
GO:0046950	cellular ketone body metabolic process	P	0.48907143521281593	0.17038216560497338	1	5.869158878504671	Over	Q8CAY6	Acat2
GO:0016018	cyclosporin A binding	F	0.48907143521281593	0.17038216560497338	1	5.869158878504671	Over	P17742	Ppia
GO:0032588	trans-Golgi network membrane	C	0.48907143521281593	0.17038216560497338	1	5.869158878504671	Over	P29788	Vtn
GO:2001288	positive regulation of caveolin-mediated endocytosis	P	0.48907143521281593	0.17038216560497338	1	5.869158878504671	Over	P49817	Cav1
GO:0043589	skin morphogenesis	P	0.48907143521281593	0.17038216560497338	1	5.869158878504671	Over	P11087	Col1a1
GO:0090076	relaxation of skeletal muscle	P	0.48907143521281593	0.17038216560497338	1	5.869158878504671	Over	O55143	Atp2a2
GO:0006813	potassium ion transport	P	0.48907143521281593	0.17038216560497338	1	5.869158878504671	Over	O55143	Atp2a2
GO:1902445	regulation of mitochondrial membrane permeability involved in programmed necrotic cell death	P	0.48907143521281593	0.17038216560497338	1	5.869158878504671	Over	P17742	Ppia
GO:0071625	vocalization behavior	P	0.48907143521281593	0.17038216560497338	1	5.869158878504671	Over	Q8VDD5	Myh9
GO:0071616	acyl-CoA biosynthetic process	P	0.48907143521281593	0.17038216560497338	1	5.869158878504671	Over	Q8CAY6	Acat2
GO:1902255	positive regulation of intrinsic apoptotic signaling pathway by p53 class mediator	P	0.48907143521281593	0.17038216560497338	1	5.869158878504671	Over	P0CG50	Ubc
GO:0071594	thymocyte aggregation	P	0.48907143521281593	0.17038216560497338	1	5.869158878504671	Over	P15702	Spn
GO:1902082	positive regulation of calcium ion import into sarcoplasmic reticulum	P	0.48907143521281593	0.17038216560497338	1	5.869158878504671	Over	O55143	Atp2a2
GO:0001855	complement component C4b binding	F	0.48907143521281593	0.17038216560497338	1	5.869158878504671	Over	Q91WP0	Masp2
GO:1905460	negative regulation of vascular associated smooth muscle cell apoptotic process	P	0.48907143521281593	0.17038216560497338	1	5.869158878504671	Over	P16858	Gapdh
GO:0003755	peptidyl-prolyl cis-trans isomerase activity	F	0.48907143521281593	0.17038216560497338	1	5.869158878504671	Over	P17742	Ppia
GO:1902035	positive regulation of hematopoietic stem cell proliferation	P	0.48907143521281593	0.17038216560497338	1	5.869158878504671	Over	Q9Z126	Pf4
GO:0001808	negative regulation of type IV hypersensitivity	P	0.48907143521281593	0.17038216560497338	1	5.869158878504671	Over	P15702	Spn
GO:0001792	polymeric immunoglobulin receptor activity	F	0.48907143521281593	0.17038216560497338	1	5.869158878504671	Over	O70570	Pigr
GO:0001791	IgM binding	F	0.48907143521281593	0.17038216560497338	1	5.869158878504671	Over	O70570	Pigr
GO:0003868	4-hydroxyphenylpyruvate dioxygenase activity	F	0.48907143521281593	0.17038216560497338	1	5.869158878504671	Over	P49429	Hpd
GO:0071492	cellular response to UV-A	P	0.48907143521281593	0.17038216560497338	1	5.869158878504671	Over	P17742	Ppia
GO:0071455	cellular response to hyperoxia	P	0.48907143521281593	0.17038216560497338	1	5.869158878504671	Over	P49817	Cav1
GO:0097513	myosin II filament	C	0.48907143521281593	0.17038216560497338	1	5.869158878504671	Over	Q8VDD5	Myh9
GO:0006509	membrane protein ectodomain proteolysis	P	0.48907143521281593	0.17038216560497338	1	5.869158878504671	Over	Q8VDD5	Myh9
GO:0003985	acetyl-CoA C-acetyltransferase activity	F	0.48907143521281593	0.17038216560497338	1	5.869158878504671	Over	Q8CAY6	Acat2
GO:0071306	cellular response to vitamin E	P	0.48907143521281593	0.17038216560497338	1	5.869158878504671	Over	P11087	Col1a1
GO:0006984	ER-nucleus signaling pathway	P	0.48907143521281593	0.17038216560497338	1	5.869158878504671	Over	O55143	Atp2a2
GO:0003983	UTP:glucose-1-phosphate uridylyltransferase activity	F	0.48907143521281593	0.17038216560497338	1	5.869158878504671	Over	Q91ZJ5	Ugp2
GO:0003360	brainstem development	P	0.48907143521281593	0.17038216560497338	1	5.869158878504671	Over	Q9CWJ9	Atic
GO:0003937	IMP cyclohydrolase activity	F	0.48907143521281593	0.17038216560497338	1	5.869158878504671	Over	Q9CWJ9	Atic
GO:1990723	cytoplasmic periphery of the nuclear pore complex	C	0.48907143521281593	0.17038216560497338	1	5.869158878504671	Over	P17742	Ppia
GO:0071307	cellular response to vitamin K	P	0.48907143521281593	0.17038216560497338	1	5.869158878504671	Over	P82198	Tgfbi
GO:0005826	actomyosin contractile ring	C	0.48907143521281593	0.17038216560497338	1	5.869158878504671	Over	Q8VDD5	Myh9
GO:0071360	cellular response to exogenous dsRNA	P	0.48907143521281593	0.17038216560497338	1	5.869158878504671	Over	P49817	Cav1
GO:0097470	ribbon synapse	C	0.48907143521281593	0.17038216560497338	1	5.869158878504671	Over	O55143	Atp2a2
GO:0071425	hematopoietic stem cell proliferation	P	0.48907143521281593	0.17038216560497338	1	5.869158878504671	Over	P29788	Vtn
GO:1901896	positive regulation of ATPase-coupled calcium transmembrane transporter activity	P	0.48907143521281593	0.17038216560497338	1	5.869158878504671	Over	O55143	Atp2a2
GO:0071723	lipopeptide binding	F	0.48907143521281593	0.17038216560497338	1	5.869158878504671	Over	Q61805	Lbp
GO:1902476	chloride transmembrane transport	P	0.48907143521281593	0.17038216560497338	1	5.869158878504671	Over	P04919	Slc4a1
GO:0003057	regulation of the force of heart contraction by chemical signal	P	0.48907143521281593	0.17038216560497338	1	5.869158878504671	Over	P49817	Cav1
GO:0006011	UDP-glucose metabolic process	P	0.48907143521281593	0.17038216560497338	1	5.869158878504671	Over	Q91ZJ5	Ugp2
GO:0002415	immunoglobulin transcytosis in epithelial cells mediated by polymeric immunoglobulin receptor	P	0.48907143521281593	0.17038216560497338	1	5.869158878504671	Over	O70570	Pigr
GO:1903071	positive regulation of ER-associated ubiquitin-dependent protein catabolic process	P	0.48907143521281593	0.17038216560497338	1	5.869158878504671	Over	P49817	Cav1
GO:0002296	T-helper 1 cell lineage commitment	P	0.48907143521281593	0.17038216560497338	1	5.869158878504671	Over	P15702	Spn
GO:0002281	macrophage activation involved in immune response	P	0.48907143521281593	0.17038216560497338	1	5.869158878504671	Over	Q61805	Lbp
GO:1903142	positive regulation of establishment of endothelial barrier	P	0.48907143521281593	0.17038216560497338	1	5.869158878504671	Over	P33587	Proc
GO:1904205	negative regulation of skeletal muscle hypertrophy	P	0.48907143521281593	0.17038216560497338	1	5.869158878504671	Over	P47878	Igfbp3
GO:0002232	leukocyte chemotaxis involved in inflammatory response	P	0.48907143521281593	0.17038216560497338	1	5.869158878504671	Over	Q61805	Lbp
GO:1903233	regulation of calcium ion-dependent exocytosis of neurotransmitter	P	0.48907143521281593	0.17038216560497338	1	5.869158878504671	Over	O55143	Atp2a2
GO:0086039	calcium-transporting ATPase activity involved in regulation of cardiac muscle cell membrane potential	F	0.48907143521281593	0.17038216560497338	1	5.869158878504671	Over	O55143	Atp2a2
GO:1903609	negative regulation of inward rectifier potassium channel activity	P	0.48907143521281593	0.17038216560497338	1	5.869158878504671	Over	P49817	Cav1
GO:0006479	protein methylation	P	0.48907143521281593	0.17038216560497338	1	5.869158878504671	Over	O35490	Bhmt
GO:0086098	angiotensin-activated signaling pathway involved in heart process	P	0.48907143521281593	0.17038216560497338	1	5.869158878504671	Over	P49817	Cav1
GO:0002095	caveolar macromolecular signaling complex	C	0.48907143521281593	0.17038216560497338	1	5.869158878504671	Over	P49817	Cav1
GO:0005338	nucleotide-sugar transmembrane transporter activity	F	0.48907143521281593	0.17038216560497338	1	5.869158878504671	Over	O55143	Atp2a2
GO:0098556	cytoplasmic side of rough endoplasmic reticulum membrane	C	0.48907143521281593	0.17038216560497338	1	5.869158878504671	Over	P61358	Rpl27
GO:0002444	myeloid leukocyte mediated immunity	P	0.48907143521281593	0.17038216560497338	1	5.869158878504671	Over	O70570	Pigr
GO:0002526	acute inflammatory response	P	0.48907143521281593	0.17038216560497338	1	5.869158878504671	Over	Q61646	Hp
GO:0003009	skeletal muscle contraction	P	0.48907143521281593	0.17038216560497338	1	5.869158878504671	Over	Q8VDD5	Myh9
GO:1902512	positive regulation of apoptotic DNA fragmentation	P	0.48907143521281593	0.17038216560497338	1	5.869158878504671	Over	P47878	Igfbp3
GO:0072329	monocarboxylic acid catabolic process	P	0.48907143521281593	0.17038216560497338	1	5.869158878504671	Over	Q8CAY6	Acat2
GO:0006607	NLS-bearing protein import into nucleus	P	0.48907143521281593	0.17038216560497338	1	5.869158878504671	Over	P17742	Ppia
GO:0006579	amino-acid betaine catabolic process	P	0.48907143521281593	0.17038216560497338	1	5.869158878504671	Over	O35490	Bhmt
GO:0097150	neuronal stem cell population maintenance	P	0.48907143521281593	0.17038216560497338	1	5.869158878504671	Over	P29788	Vtn
GO:0090398	cellular senescence	P	0.48907143521281593	0.17038216560497338	1	5.869158878504671	Over	P49817	Cav1
GO:0072376	protein activation cascade	P	0.48907143521281593	0.17038216560497338	1	5.869158878504671	Over	Q9EQK5	Mvp
GO:1904684	negative regulation of metalloendopeptidase activity	P	0.48907143521281593	0.17038216560497338	1	5.869158878504671	Over	P39876	Timp3
GO:1904231	positive regulation of succinate dehydrogenase activity	P	0.48907143521281593	0.17038216560497338	1	5.869158878504671	Over	P09528	Fth1
GO:0090559	regulation of membrane permeability	P	0.48907143521281593	0.17038216560497338	1	5.869158878504671	Over	Q61805	Lbp
GO:0072520	seminiferous tubule development	P	0.48907143521281593	0.17038216560497338	1	5.869158878504671	Over	P0CG50	Ubc
GO:0090534	calcium ion-transporting ATPase complex	C	0.48907143521281593	0.17038216560497338	1	5.869158878504671	Over	O55143	Atp2a2
GO:0002693	positive regulation of cellular extravasation	P	0.48907143521281593	0.17038216560497338	1	5.869158878504671	Over	P01831	Thy1
GO:1902532	negative regulation of intracellular signal transduction	P	0.48907143521281593	0.17038216560497338	1	5.869158878504671	Over	P98086	C1qa
GO:0098662	inorganic cation transmembrane transport	P	0.48907143521281593	0.17038216560497338	1	5.869158878504671	Over	P04919	Slc4a1
GO:0071267	L-methionine salvage	P	0.48907143521281593	0.17038216560497338	1	5.869158878504671	Over	O35490	Bhmt
GO:1901862	negative regulation of muscle tissue development	P	0.48907143521281593	0.17038216560497338	1	5.869158878504671	Over	P47878	Igfbp3
GO:0070098	chemokine-mediated signaling pathway	P	0.48907143521281593	0.17038216560497338	1	5.869158878504671	Over	Q9Z126	Pf4
GO:1901077	regulation of relaxation of muscle	P	0.48907143521281593	0.17038216560497338	1	5.869158878504671	Over	Q6P069	Sri
GO:1901361	organic cyclic compound catabolic process	P	0.48907143521281593	0.17038216560497338	1	5.869158878504671	Over	Q8CAY6	Acat2
GO:0106134	positive regulation of cardiac muscle cell contraction	P	0.48907143521281593	0.17038216560497338	1	5.869158878504671	Over	O55143	Atp2a2
GO:1901576	organic substance biosynthetic process	P	0.48907143521281593	0.17038216560497338	1	5.869158878504671	Over	Q8CFX1	H6pd
GO:0004842	ubiquitin-protein transferase activity	F	0.48907143521281593	0.17038216560497338	1	5.869158878504671	Over	A2AN08	Ubr4
GO:1901019	regulation of calcium ion transmembrane transporter activity	P	0.48907143521281593	0.17038216560497338	1	5.869158878504671	Over	P49817	Cav1
GO:0004742	dihydrolipoyllysine-residue acetyltransferase activity	F	0.48907143521281593	0.17038216560497338	1	5.869158878504671	Over	Q8BMF4	Dlat
GO:0004643	phosphoribosylaminoimidazolecarboxamide formyltransferase activity	F	0.48907143521281593	0.17038216560497338	1	5.869158878504671	Over	Q9CWJ9	Atic
GO:0070320	inward rectifier potassium channel inhibitor activity	F	0.48907143521281593	0.17038216560497338	1	5.869158878504671	Over	P49817	Cav1
GO:0004558	alpha-1,4-glucosidase activity	F	0.48907143521281593	0.17038216560497338	1	5.869158878504671	Over	Q8BHN3	Ganab
GO:0000398	mRNA splicing, via spliceosome	P	0.48907143521281593	0.17038216560497338	1	5.869158878504671	Over	P17742	Ppia
GO:0000413	protein peptidyl-prolyl isomerization	P	0.48907143521281593	0.17038216560497338	1	5.869158878504671	Over	P17742	Ppia
GO:0099537	trans-synaptic signaling	P	0.48907143521281593	0.17038216560497338	1	5.869158878504671	Over	Q8K0D2	Habp2
GO:0004735	pyrroline-5-carboxylate reductase activity	F	0.48907143521281593	0.17038216560497338	1	5.869158878504671	Over	Q9DCC4	Pycr3
GO:0004022	alcohol dehydrogenase (NAD) activity	F	0.48907143521281593	0.17038216560497338	1	5.869158878504671	Over	O88451	Rdh7
GO:0008009	chemokine activity	F	0.48907143521281593	0.17038216560497338	1	5.869158878504671	Over	Q9Z126	Pf4
GO:0000188	inactivation of MAPK activity	P	0.48907143521281593	0.17038216560497338	1	5.869158878504671	Over	P49817	Cav1
GO:0070012	oligopeptidase activity	F	0.48907143521281593	0.17038216560497338	1	5.869158878504671	Over	P33587	Proc
GO:0150078	positive regulation of neuroinflammatory response	P	0.48907143521281593	0.17038216560497338	1	5.869158878504671	Over	P29788	Vtn
GO:0005391	sodium:potassium-exchanging ATPase activity	F	0.48907143521281593	0.17038216560497338	1	5.869158878504671	Over	O55143	Atp2a2
GO:0005452	inorganic anion exchanger activity	F	0.48907143521281593	0.17038216560497338	1	5.869158878504671	Over	P04919	Slc4a1
GO:1900085	negative regulation of peptidyl-tyrosine autophosphorylation	P	0.48907143521281593	0.17038216560497338	1	5.869158878504671	Over	P49817	Cav1
GO:2001243	negative regulation of intrinsic apoptotic signaling pathway	P	0.48907143521281593	0.17038216560497338	1	5.869158878504671	Over	P17742	Ppia
GO:0005528	FK506 binding	F	0.48907143521281593	0.17038216560497338	1	5.869158878504671	Over	P17742	Ppia
GO:0005154	epidermal growth factor receptor binding	F	0.48907143521281593	0.17038216560497338	1	5.869158878504671	Over	O70570	Pigr
GO:0008179	adenylate cyclase binding	F	0.48907143521281593	0.17038216560497338	1	5.869158878504671	Over	P40124	Cap1
GO:0008160	protein tyrosine phosphatase activator activity	F	0.48907143521281593	0.17038216560497338	1	5.869158878504671	Over	P47878	Igfbp3
GO:0008154	actin polymerization or depolymerization	P	0.48907143521281593	0.17038216560497338	1	5.869158878504671	Over	P40124	Cap1
GO:1900826	negative regulation of membrane depolarization during cardiac muscle cell action potential	P	0.48907143521281593	0.17038216560497338	1	5.869158878504671	Over	P49817	Cav1
GO:0120178	steroid hormone biosynthetic process	P	0.48907143521281593	0.17038216560497338	1	5.869158878504671	Over	O88451	Rdh7
GO:2000844	negative regulation of testosterone secretion	P	0.48907143521281593	0.17038216560497338	1	5.869158878504671	Over	P47878	Igfbp3
GO:0070059	intrinsic apoptotic signaling pathway in response to endoplasmic reticulum stress	P	0.48907143521281593	0.17038216560497338	1	5.869158878504671	Over	O55143	Atp2a2
GO:0004365	glyceraldehyde-3-phosphate dehydrogenase (NAD+) (phosphorylating) activity	F	0.48907143521281593	0.17038216560497338	1	5.869158878504671	Over	P16858	Gapdh
GO:0004411	homogentisate 1,2-dioxygenase activity	F	0.48907143521281593	0.17038216560497338	1	5.869158878504671	Over	O09173	Hgd
GO:0004056	argininosuccinate lyase activity	F	0.48907143521281593	0.17038216560497338	1	5.869158878504671	Over	Q91YI0	Asl
GO:0004029	aldehyde dehydrogenase (NAD) activity	F	0.48907143521281593	0.17038216560497338	1	5.869158878504671	Over	Q8R0Y6	Aldh1l1
GO:0007029	endoplasmic reticulum organization	P	0.48907143521281593	0.17038216560497338	1	5.869158878504671	Over	P49817	Cav1
GO:0071253	connexin binding	F	0.48907143521281593	0.17038216560497338	1	5.869158878504671	Over	P49817	Cav1
GO:0001667	ameboidal-type cell migration	P	0.48907143521281593	0.17038216560497338	1	5.869158878504671	Over	P40124	Cap1
GO:2000286	receptor internalization involved in canonical Wnt signaling pathway	P	0.48907143521281593	0.17038216560497338	1	5.869158878504671	Over	P49817	Cav1
GO:0098903	regulation of membrane repolarization during action potential	P	0.48907143521281593	0.17038216560497338	1	5.869158878504671	Over	P49817	Cav1
GO:2000296	negative regulation of hydrogen peroxide catabolic process	P	0.48907143521281593	0.17038216560497338	1	5.869158878504671	Over	Q61646	Hp
GO:0005753	mitochondrial proton-transporting ATP synthase complex	C	0.48907143521281593	0.17038216560497338	1	5.869158878504671	Over	P17742	Ppia
GO:0071203	WASH complex	C	0.48907143521281593	0.17038216560497338	1	5.869158878504671	Over	P47754	Capza2
GO:0071007	U2-type catalytic step 2 spliceosome	C	0.48907143521281593	0.17038216560497338	1	5.869158878504671	Over	P17742	Ppia
GO:0071001	U4/U6 snRNP	C	0.48907143521281593	0.17038216560497338	1	5.869158878504671	Over	P17742	Ppia
GO:2000298	regulation of Rho-dependent protein serine/threonine kinase activity	P	0.48907143521281593	0.17038216560497338	1	5.869158878504671	Over	P01831	Thy1
GO:0070951	regulation of neutrophil mediated killing of gram-negative bacterium	P	0.48907143521281593	0.17038216560497338	1	5.869158878504671	Over	Q9Z126	Pf4
GO:0004345	glucose-6-phosphate dehydrogenase activity	F	0.48907143521281593	0.17038216560497338	1	5.869158878504671	Over	Q8CFX1	H6pd
GO:0004126	cytidine deaminase activity	F	0.48907143521281593	0.17038216560497338	1	5.869158878504671	Over	Q9DCC4	Pycr3
GO:1903515	calcium ion transport from cytosol to endoplasmic reticulum	P	0.48907143521281593	0.17038216560497338	1	5.869158878504671	Over	O55143	Atp2a2
GO:0005642	annulate lamellae	C	0.48907143521281593	0.17038216560497338	1	5.869158878504671	Over	P17742	Ppia
GO:0098966	perisynaptic extracellular matrix	C	0.48907143521281593	0.17038216560497338	1	5.869158878504671	Over	P41317	Mbl2
GO:2000535	regulation of entry of bacterium into host cell	P	0.48907143521281593	0.17038216560497338	1	5.869158878504671	Over	P49817	Cav1
GO:0004303	estradiol 17-beta-dehydrogenase activity	F	0.48907143521281593	0.17038216560497338	1	5.869158878504671	Over	O88451	Rdh7
GO:1901841	regulation of high voltage-gated calcium channel activity	P	0.48907143521281593	0.17038216560497338	1	5.869158878504671	Over	Q6P069	Sri
GO:0070650	actin filament bundle distribution	P	0.48907143521281593	0.17038216560497338	1	5.869158878504671	Over	Q8VDD5	Myh9
GO:0099143	presynaptic actin cytoskeleton	C	0.48907143521281593	0.17038216560497338	1	5.869158878504671	Over	P68134	Acta1
GO:0070571	negative regulation of neuron projection regeneration	P	0.48907143521281593	0.17038216560497338	1	5.869158878504671	Over	P01831	Thy1
GO:0001562	response to protozoan	P	0.48907143521281593	0.17038216560497338	1	5.869158878504671	Over	P15702	Spn
GO:2000378	negative regulation of reactive oxygen species metabolic process	P	0.48907143521281593	0.17038216560497338	1	5.869158878504671	Over	P23927	Cryab
GO:0000502	proteasome complex	C	0.48907143521281593	0.17038216560497338	1	5.869158878504671	Over	P14602	Hspb1
GO:0004139	deoxyribose-phosphate aldolase activity	F	0.48907143521281593	0.17038216560497338	1	5.869158878504671	Over	Q91YP3	Dera
GO:0005771	multivesicular body	C	0.5324169464595712	0.1858212991775617	3	1.9563862928348907	Over	P01867,P01864,P01868	Igh-3,-,Ighg1
GO:0030198	extracellular matrix organization	P	0.5343161715292805	0.1868238361990491	5	1.726223199560198	Over	P48759,P29788,Q04857,P82198,P28653	Ptx3,Vtn,Col6a1,Tgfbi,Bgn
GO:0031116	positive regulation of microtubule polymerization	P	0.5456989783583309	0.20294590104235447	2	2.347663551401869	Over	P63001,P49817	Rac1,Cav1
GO:0030182	neuron differentiation	P	0.5456989783583309	0.20294590104235447	2	2.347663551401869	Over	P17742,Q8R0Y6	Ppia,Aldh1l1
GO:0030334	regulation of cell migration	P	0.5456989783583309	0.20294590104235447	2	2.347663551401869	Over	Q8K0D2,Q9R098	Habp2,Hgfac
GO:1902176	negative regulation of oxidative stress-induced intrinsic apoptotic signaling pathway	P	0.5456989783583309	0.20294590104235447	2	2.347663551401869	Over	P23927,P14602	Cryab,Hspb1
GO:0034451	centriolar satellite	C	0.5456989783583309	0.20294590104235447	2	2.347663551401869	Over	Q91Y97,P05064	Aldob,Aldoa
GO:0031638	zymogen activation	P	0.5456989783583309	0.20294590104235447	2	2.347663551401869	Over	Q8CG16,Q8K0D2	C1ra,Habp2
GO:0021987	cerebral cortex development	P	0.5456989783583309	0.20294590104235447	2	2.347663551401869	Over	Q9CWJ9,P11087	Atic,Col1a1
GO:0051973	positive regulation of telomerase activity	P	0.5456989783583309	0.20294590104235447	2	2.347663551401869	Over	P80315,P11983	Cct4,Tcp1
GO:0005833	hemoglobin complex	C	0.5456989783583309	0.20294590104235447	2	2.347663551401869	Over	Q61646,P04919	Hp,Slc4a1
GO:0005871	kinesin complex	C	0.5456989783583309	0.20294590104235447	2	2.347663551401869	Over	P60710,P68134	Actb,Acta1
GO:0005865	striated muscle thin filament	C	0.5456989783583309	0.20294590104235447	2	2.347663551401869	Over	P60710,P68134	Actb,Acta1
GO:0030544	Hsp70 protein binding	F	0.5456989783583309	0.20294590104235447	2	2.347663551401869	Over	P17742,P15702	Ppia,Spn
GO:1990890	netrin receptor binding	F	0.5456989783583309	0.20294590104235447	2	2.347663551401869	Over	P99024,P68368	Tubb5,Tuba4a
GO:0006550	isoleucine catabolic process	P	0.5456989783583309	0.20294590104235447	2	2.347663551401869	Over	Q8R0Y6,Q8CAY6	Aldh1l1,Acat2
GO:0045792	negative regulation of cell size	P	0.5456989783583309	0.20294590104235447	2	2.347663551401869	Over	P63001,P49817	Rac1,Cav1
GO:0006552	leucine catabolic process	P	0.5456989783583309	0.20294590104235447	2	2.347663551401869	Over	Q8R0Y6,Q8CAY6	Aldh1l1,Acat2
GO:0001931	uropod	C	0.5456989783583309	0.20294590104235447	2	2.347663551401869	Over	P15702,Q8VDD5	Spn,Myh9
GO:0006574	valine catabolic process	P	0.5456989783583309	0.20294590104235447	2	2.347663551401869	Over	Q8R0Y6,Q8CAY6	Aldh1l1,Acat2
GO:0006699	bile acid biosynthetic process	P	0.5456989783583309	0.20294590104235447	2	2.347663551401869	Over	O88451,Q8R0Y6	Rdh7,Aldh1l1
GO:0007010	cytoskeleton organization	P	0.5456989783583309	0.20294590104235447	2	2.347663551401869	Over	P14602,P01831	Hspb1,Thy1
GO:0007015	actin filament organization	P	0.5456989783583309	0.20294590104235447	2	2.347663551401869	Over	P23927,P49817	Cryab,Cav1
GO:0007097	nuclear migration	P	0.5456989783583309	0.20294590104235447	2	2.347663551401869	Over	P63001,Q8VDD5	Rac1,Myh9
GO:0001664	G protein-coupled receptor binding	F	0.5456989783583309	0.20294590104235447	2	2.347663551401869	Over	P05367,P05366	Saa2,Saa1
GO:0001558	regulation of cell growth	P	0.5456989783583309	0.20294590104235447	2	2.347663551401869	Over	P47878,P14602	Igfbp3,Hspb1
GO:0007517	muscle organ development	P	0.5456989783583309	0.20294590104235447	2	2.347663551401869	Over	P23927,P14602	Cryab,Hspb1
GO:0000278	mitotic cell cycle	P	0.5456989783583309	0.20294590104235447	2	2.347663551401869	Over	P99024,P68368	Tubb5,Tuba4a
GO:0044305	calyx of Held	C	0.5456989783583309	0.20294590104235447	2	2.347663551401869	Over	P60710,P68134	Actb,Acta1
GO:0008076	voltage-gated potassium channel complex	C	0.5456989783583309	0.20294590104235447	2	2.347663551401869	Over	Q60605,P09542	Myl6,Myl3
GO:0008198	ferrous iron binding	F	0.5456989783583309	0.20294590104235447	2	2.347663551401869	Over	P09528,P29391	Fth1,Ftl1
GO:0043621	protein self-association	F	0.5456989783583309	0.20294590104235447	2	2.347663551401869	Over	P33587,P41317	Proc,Mbl2
GO:0042056	chemoattractant activity	F	0.5456989783583309	0.20294590104235447	2	2.347663551401869	Over	P05367,P05366	Saa2,Saa1
GO:0016208	AMP binding	F	0.5456989783583309	0.20294590104235447	2	2.347663551401869	Over	P47857,Q9WUB3	Pfkm,Pygm
GO:0031295	T cell costimulation	P	0.5456989783583309	0.20294590104235447	2	2.347663551401869	Over	P15702,P49817	Spn,Cav1
GO:0060056	mammary gland involution	P	0.5456989783583309	0.20294590104235447	2	2.347663551401869	Over	P47878,P49817	Igfbp3,Cav1
GO:0038007	netrin-activated signaling pathway	P	0.5456989783583309	0.20294590104235447	2	2.347663551401869	Over	P99024,P68368	Tubb5,Tuba4a
GO:0005509	calcium ion binding	F	0.5486193119921365	0.20438074814201654	14	1.3694704049844235	Over	P33587,P31725,P99024,Q60605,Q6P069,O55143,Q8CG16,Q8CG14,P41317,Q8K0D2,A6X935,P09542,Q91WP0,P98064	Proc,S100a9,Tubb5,Myl6,Sri,Atp2a2,C1ra,C1sa,Mbl2,Habp2,Itih4,Myl3,Masp2,Masp1
GO:0048471	perinuclear region of cytoplasm	C	0.5848779422953765	0.2208200783493861	7	0.6320632638389647	Under	P63001,Q9EQK5,Q91Y97,P49817,O55143,P05064,Q91YI0	Rac1,Mvp,Aldob,Cav1,Atp2a2,Aldoa,Asl
GO:0045766	positive regulation of angiogenesis	P	0.5848779422953765	0.2250211169517515	1	0.2934579439252336	Under	P14602	Hspb1
GO:0046982	protein heterodimerization activity	F	0.5848779422953765	0.24416651579540932	3	0.5178669598680593	Under	P99024,Q6P069,P49817	Tubb5,Sri,Cav1
GO:0061844	antimicrobial humoral immune response mediated by antimicrobial peptide	P	0.5848779422953765	0.2516371090957553	4	1.8058950395398994	Over	Q9Z126,P31725,P62889,P16858	Pf4,S100a9,Rpl30,Gapdh
GO:0070062	extracellular exosome	C	0.5848779422953765	0.25620416637024224	6	1.531084924827306	Over	Q6P069,P60710,Q91Y97,O35490,P68134,P05064	Sri,Actb,Aldob,Bhmt,Acta1,Aldoa
GO:0070373	negative regulation of ERK1 and ERK2 cascade	P	0.5848779422953765	0.2719132703149764	2	1.9563862928348907	Over	P49817,P39876	Cav1,Timp3
GO:0031941	filamentous actin	C	0.5848779422953765	0.2719132703149764	2	1.9563862928348907	Over	P63001,P68134	Rac1,Acta1
GO:0010043	response to zinc ion	P	0.5848779422953765	0.2719132703149764	2	1.9563862928348907	Over	Q91Y97,P05064	Aldob,Aldoa
GO:0030512	negative regulation of transforming growth factor beta receptor signaling pathway	P	0.5848779422953765	0.2719132703149764	2	1.9563862928348907	Over	P49817,P28653	Cav1,Bgn
GO:0060326	cell chemotaxis	P	0.5848779422953765	0.2719132703149764	2	1.9563862928348907	Over	P05367,P05366	Saa2,Saa1
GO:0051894	positive regulation of focal adhesion assembly	P	0.5848779422953765	0.2719132703149764	2	1.9563862928348907	Over	P63001,P01831	Rac1,Thy1
GO:0099738	cell cortex region	C	0.5848779422953765	0.2719132703149764	2	1.9563862928348907	Over	P60710,P68134	Actb,Acta1
GO:0015994	chlorophyll metabolic process	P	0.5848779422953765	0.2719132703149764	2	1.9563862928348907	Over	P09528,P29391	Fth1,Ftl1
GO:0006754	ATP biosynthetic process	P	0.5848779422953765	0.2719132703149764	2	1.9563862928348907	Over	Q91Y97,P05064	Aldob,Aldoa
GO:0019825	oxygen binding	F	0.5848779422953765	0.2719132703149764	2	1.9563862928348907	Over	P04247,P33267	Mb,Cyp2f2
GO:0035774	positive regulation of insulin secretion involved in cellular response to glucose stimulus	P	0.5848779422953765	0.2719132703149764	2	1.9563862928348907	Over	P63001,Q6P069	Rac1,Sri
GO:0007520	myoblast fusion	P	0.5848779422953765	0.2719132703149764	2	1.9563862928348907	Over	P49817,Q8VDD5	Cav1,Myh9
GO:0097512	cardiac myofibril	C	0.5848779422953765	0.2719132703149764	2	1.9563862928348907	Over	P23927,P14602	Cryab,Hspb1
GO:0006554	lysine catabolic process	P	0.5848779422953765	0.2719132703149764	2	1.9563862928348907	Over	Q8R0Y6,Q8CAY6	Aldh1l1,Acat2
GO:0050918	positive chemotaxis	P	0.5848779422953765	0.2719132703149764	2	1.9563862928348907	Over	P05367,P05366	Saa2,Saa1
GO:0005790	smooth endoplasmic reticulum	C	0.5848779422953765	0.2719132703149764	2	1.9563862928348907	Over	P17742,Q6P069	Ppia,Sri
GO:0010605	negative regulation of macromolecule metabolic process	P	0.5848779422953765	0.2719132703149764	2	1.9563862928348907	Over	P33587,Q6P069	Proc,Sri
GO:0043113	receptor clustering	P	0.5848779422953765	0.2719132703149764	2	1.9563862928348907	Over	O70570,P01831	Pigr,Thy1
GO:0051225	spindle assembly	P	0.5848779422953765	0.2719132703149764	2	1.9563862928348907	Over	P99024,P68368	Tubb5,Tuba4a
GO:0055010	ventricular cardiac muscle tissue morphogenesis	P	0.5848779422953765	0.2719132703149764	2	1.9563862928348907	Over	Q60605,P09542	Myl6,Myl3
GO:0030593	neutrophil chemotaxis	P	0.5848779422953765	0.2719132703149764	2	1.9563862928348907	Over	Q9Z126,P31725	Pf4,S100a9
GO:0030175	filopodium	C	0.5848779422953765	0.27399928659899186	4	1.6769025367156207	Over	P99024,P68368,P60710,P68134	Tubb5,Tuba4a,Actb,Acta1
GO:0000122	negative regulation of transcription by RNA polymerase II	P	0.5848779422953765	0.28569740346577593	2	0.4695327102803738	Under	P17742,P49817	Ppia,Cav1
GO:0005764	lysosome	C	0.5848779422953765	0.2864721214236205	2	0.45147375988497485	Under	Q91Y97,P05064	Aldob,Aldoa
GO:0004867	serine-type endopeptidase inhibitor activity	F	0.5848779422953765	0.2864721214236205	2	0.45147375988497485	Under	Q91WP6,A6X935	Serpina3n,Itih4
GO:0042593	glucose homeostasis	P	0.5848779422953765	0.3011525071919259	4	1.5651090342679126	Over	P47857,P47878,P49817,Q9WUB3	Pfkm,Igfbp3,Cav1,Pygm
GO:0009725	response to hormone	P	0.5848779422953765	0.3011525071919259	4	1.5651090342679126	Over	P33587,P04247,P47878,P39876	Proc,Mb,Igfbp3,Timp3
GO:0005518	collagen binding	F	0.5848779422953765	0.3011525071919259	4	1.5651090342679126	Over	P17742,Q04857,P82198,P28653	Ppia,Col6a1,Tgfbi,Bgn
GO:0008360	regulation of cell shape	P	0.5848779422953765	0.3011525071919259	4	1.5651090342679126	Over	P63001,Q91Y97,P05064,Q8VDD5	Rac1,Aldob,Aldoa,Myh9
GO:0014704	intercalated disc	C	0.5848779422953765	0.3011525071919259	4	1.5651090342679126	Over	P49817,O55143,P04919,Q8VDD5	Cav1,Atp2a2,Slc4a1,Myh9
GO:1903598	positive regulation of gap junction assembly	P	0.5848779422953765	0.3119596907729313	1	2.9345794392523357	Over	P49817	Cav1
GO:0044548	S100 protein binding	F	0.5848779422953765	0.3119596907729313	1	2.9345794392523357	Over	O55143	Atp2a2
GO:0043651	linoleic acid metabolic process	P	0.5848779422953765	0.3119596907729313	1	2.9345794392523357	Over	P33267	Cyp2f2
GO:0004177	aminopeptidase activity	F	0.5848779422953765	0.3119596907729313	1	2.9345794392523357	Over	Q64514	Tpp2
GO:0031397	negative regulation of protein ubiquitination	P	0.5848779422953765	0.3119596907729313	1	2.9345794392523357	Over	P49817	Cav1
GO:0002093	auditory receptor cell morphogenesis	P	0.5848779422953765	0.3119596907729313	1	2.9345794392523357	Over	P63001	Rac1
GO:0032418	lysosome localization	P	0.5848779422953765	0.3119596907729313	1	2.9345794392523357	Over	Q8VDD5	Myh9
GO:0045918	negative regulation of cytolysis	P	0.5848779422953765	0.3119596907729313	1	2.9345794392523357	Over	Q9Z126	Pf4
GO:0031362	anchored component of external side of plasma membrane	C	0.5848779422953765	0.3119596907729313	1	2.9345794392523357	Over	P01831	Thy1
GO:0000053	argininosuccinate metabolic process	P	0.5848779422953765	0.3119596907729313	1	2.9345794392523357	Over	Q91YI0	Asl
GO:0005246	calcium channel regulator activity	F	0.5848779422953765	0.3119596907729313	1	2.9345794392523357	Over	P49817	Cav1
GO:0044869	negative regulation by host of viral exo-alpha-sialidase activity	P	0.5848779422953765	0.3119596907729313	1	2.9345794392523357	Over	P48759	Ptx3
GO:0032427	GBD domain binding	F	0.5848779422953765	0.3119596907729313	1	2.9345794392523357	Over	P63001	Rac1
GO:0043032	positive regulation of macrophage activation	P	0.5848779422953765	0.3119596907729313	1	2.9345794392523357	Over	Q61805	Lbp
GO:0044871	negative regulation by host of viral glycoprotein metabolic process	P	0.5848779422953765	0.3119596907729313	1	2.9345794392523357	Over	P48759	Ptx3
GO:0032463	negative regulation of protein homooligomerization	P	0.5848779422953765	0.3119596907729313	1	2.9345794392523357	Over	P23927	Cryab
GO:0048666	neuron development	P	0.5848779422953765	0.3119596907729313	1	2.9345794392523357	Over	P04919	Slc4a1
GO:0043021	ribonucleoprotein complex binding	F	0.5848779422953765	0.3119596907729313	1	2.9345794392523357	Over	P17742	Ppia
GO:0043652	engulfment of apoptotic cell	P	0.5848779422953765	0.3119596907729313	1	2.9345794392523357	Over	P63001	Rac1
GO:0048525	negative regulation of viral process	P	0.5848779422953765	0.3119596907729313	1	2.9345794392523357	Over	P41317	Mbl2
GO:0044537	regulation of circulating fibrinogen levels	P	0.5848779422953765	0.3119596907729313	1	2.9345794392523357	Over	P33587	Proc
GO:0044344	cellular response to fibroblast growth factor stimulus	P	0.5848779422953765	0.3119596907729313	1	2.9345794392523357	Over	P11087	Col1a1
GO:2000811	negative regulation of anoikis	P	0.5848779422953765	0.3119596907729313	1	2.9345794392523357	Over	P49817	Cav1
GO:0004745	retinol dehydrogenase activity	F	0.5848779422953765	0.3119596907729313	1	2.9345794392523357	Over	O88451	Rdh7
GO:0043495	protein membrane anchor	F	0.5848779422953765	0.3119596907729313	1	2.9345794392523357	Over	Q8VDD5	Myh9
GO:0035987	endodermal cell differentiation	P	0.5848779422953765	0.3119596907729313	1	2.9345794392523357	Over	P29788	Vtn
GO:0031663	lipopolysaccharide-mediated signaling pathway	P	0.5848779422953765	0.3119596907729313	1	2.9345794392523357	Over	Q61805	Lbp
GO:0048596	embryonic camera-type eye morphogenesis	P	0.5848779422953765	0.3119596907729313	1	2.9345794392523357	Over	P23927	Cryab
GO:0043304	regulation of mast cell degranulation	P	0.5848779422953765	0.3119596907729313	1	2.9345794392523357	Over	P63001	Rac1
GO:0000322	storage vacuole	C	0.5848779422953765	0.3119596907729313	1	2.9345794392523357	Over	P63001	Rac1
GO:0031883	taste receptor binding	F	0.5848779422953765	0.3119596907729313	1	2.9345794392523357	Over	Q9JM62	Reep6
GO:0031995	insulin-like growth factor II binding	F	0.5848779422953765	0.3119596907729313	1	2.9345794392523357	Over	P47878	Igfbp3
GO:0031996	thioesterase binding	F	0.5848779422953765	0.3119596907729313	1	2.9345794392523357	Over	P63001	Rac1
GO:0043280	positive regulation of cysteine-type endopeptidase activity involved in apoptotic process	P	0.5848779422953765	0.3119596907729313	1	2.9345794392523357	Over	P63001	Rac1
GO:0031435	mitogen-activated protein kinase kinase kinase binding	F	0.5848779422953765	0.3119596907729313	1	2.9345794392523357	Over	P63001	Rac1
GO:0048664	neuron fate determination	P	0.5848779422953765	0.3119596907729313	1	2.9345794392523357	Over	P63001	Rac1
GO:0036336	dendritic cell migration	P	0.5848779422953765	0.3119596907729313	1	2.9345794392523357	Over	P63001	Rac1
GO:0043226	organelle	C	0.5848779422953765	0.3119596907729313	1	2.9345794392523357	Over	P48759	Ptx3
GO:0048532	anatomical structure arrangement	P	0.5848779422953765	0.3119596907729313	1	2.9345794392523357	Over	P63001	Rac1
GO:0043366	beta selection	P	0.5848779422953765	0.3119596907729313	1	2.9345794392523357	Over	P63001	Rac1
GO:0044317	rod spherule	C	0.5848779422953765	0.3119596907729313	1	2.9345794392523357	Over	Q9JM62	Reep6
GO:0001958	endochondral ossification	P	0.5848779422953765	0.3119596907729313	1	2.9345794392523357	Over	P11087	Col1a1
GO:1903673	mitotic cleavage furrow formation	P	0.5848779422953765	0.3119596907729313	1	2.9345794392523357	Over	P63001	Rac1
GO:0045653	negative regulation of megakaryocyte differentiation	P	0.5848779422953765	0.3119596907729313	1	2.9345794392523357	Over	Q9Z126	Pf4
GO:0003161	cardiac conduction system development	P	0.5848779422953765	0.3119596907729313	1	2.9345794392523357	Over	P63001	Rac1
GO:0035385	Roundabout signaling pathway	P	0.5848779422953765	0.3119596907729313	1	2.9345794392523357	Over	P63001	Rac1
GO:0003100	regulation of systemic arterial blood pressure by endothelin	P	0.5848779422953765	0.3119596907729313	1	2.9345794392523357	Over	P63001	Rac1
GO:1904695	positive regulation of vascular smooth muscle contraction	P	0.5848779422953765	0.3119596907729313	1	2.9345794392523357	Over	P63001	Rac1
GO:0046676	negative regulation of insulin secretion	P	0.5848779422953765	0.3119596907729313	1	2.9345794392523357	Over	P47857	Pfkm
GO:0033144	negative regulation of intracellular steroid hormone receptor signaling pathway	P	0.5848779422953765	0.3119596907729313	1	2.9345794392523357	Over	P63001	Rac1
GO:0045664	regulation of neuron differentiation	P	0.5848779422953765	0.3119596907729313	1	2.9345794392523357	Over	P39876	Timp3
GO:0045668	negative regulation of osteoblast differentiation	P	0.5848779422953765	0.3119596907729313	1	2.9345794392523357	Over	P47878	Igfbp3
GO:0035368	selenocysteine insertion sequence binding	F	0.5848779422953765	0.3119596907729313	1	2.9345794392523357	Over	P62889	Rpl30
GO:1902527	positive regulation of protein monoubiquitination	P	0.5848779422953765	0.3119596907729313	1	2.9345794392523357	Over	P0CG50	Ubc
GO:0002931	response to ischemia	P	0.5848779422953765	0.3119596907729313	1	2.9345794392523357	Over	P49817	Cav1
GO:0001975	response to amphetamine	P	0.5848779422953765	0.3119596907729313	1	2.9345794392523357	Over	P17742	Ppia
GO:0046549	retinal cone cell development	P	0.5848779422953765	0.3119596907729313	1	2.9345794392523357	Over	P01831	Thy1
GO:0002793	positive regulation of peptide secretion	P	0.5848779422953765	0.3119596907729313	1	2.9345794392523357	Over	P31725	S100a9
GO:0042130	negative regulation of T cell proliferation	P	0.5848779422953765	0.3119596907729313	1	2.9345794392523357	Over	P15702	Spn
GO:0033688	regulation of osteoblast proliferation	P	0.5848779422953765	0.3119596907729313	1	2.9345794392523357	Over	P63001	Rac1
GO:0002697	regulation of immune effector process	P	0.5848779422953765	0.3119596907729313	1	2.9345794392523357	Over	P01029	C4b
GO:0002696	positive regulation of leukocyte activation	P	0.5848779422953765	0.3119596907729313	1	2.9345794392523357	Over	P29788	Vtn
GO:0046500	S-adenosylmethionine metabolic process	P	0.5848779422953765	0.3119596907729313	1	2.9345794392523357	Over	O35490	Bhmt
GO:0038063	collagen-activated tyrosine kinase receptor signaling pathway	P	0.5848779422953765	0.3119596907729313	1	2.9345794392523357	Over	P11087	Col1a1
GO:1902617	response to fluoride	P	0.5848779422953765	0.3119596907729313	1	2.9345794392523357	Over	P11087	Col1a1
GO:0034875	caffeine oxidase activity	F	0.5848779422953765	0.3119596907729313	1	2.9345794392523357	Over	P33267	Cyp2f2
GO:0002455	humoral immune response mediated by circulating immunoglobulin	P	0.5848779422953765	0.3119596907729313	1	2.9345794392523357	Over	P01878	-
GO:0034613	cellular protein localization	P	0.5848779422953765	0.3119596907729313	1	2.9345794392523357	Over	Q6P069	Sri
GO:0002363	alpha-beta T cell lineage commitment	P	0.5848779422953765	0.3119596907729313	1	2.9345794392523357	Over	P63001	Rac1
GO:0001960	negative regulation of cytokine-mediated signaling pathway	P	0.5848779422953765	0.3119596907729313	1	2.9345794392523357	Over	P49817	Cav1
GO:0042313	protein kinase C deactivation	P	0.5848779422953765	0.3119596907729313	1	2.9345794392523357	Over	P14602	Hspb1
GO:0046790	virion binding	F	0.5848779422953765	0.3119596907729313	1	2.9345794392523357	Over	P48759	Ptx3
GO:0046835	carbohydrate phosphorylation	P	0.5848779422953765	0.3119596907729313	1	2.9345794392523357	Over	P47857	Pfkm
GO:1904948	midbrain dopaminergic neuron differentiation	P	0.5848779422953765	0.3119596907729313	1	2.9345794392523357	Over	P63001	Rac1
GO:0032467	positive regulation of cytokinesis	P	0.5848779422953765	0.3119596907729313	1	2.9345794392523357	Over	P63001	Rac1
GO:2000112	regulation of cellular macromolecule biosynthetic process	P	0.5848779422953765	0.3119596907729313	1	2.9345794392523357	Over	P98086	C1qa
GO:0045111	intermediate filament cytoskeleton	C	0.5848779422953765	0.3119596907729313	1	2.9345794392523357	Over	P42932	Cct8
GO:0032471	negative regulation of endoplasmic reticulum calcium ion concentration	P	0.5848779422953765	0.3119596907729313	1	2.9345794392523357	Over	O55143	Atp2a2
GO:1902766	skeletal muscle satellite cell migration	P	0.5848779422953765	0.3119596907729313	1	2.9345794392523357	Over	P63001	Rac1
GO:0032488	Cdc42 protein signal transduction	P	0.5848779422953765	0.3119596907729313	1	2.9345794392523357	Over	P63001	Rac1
GO:0045113	regulation of integrin biosynthetic process	P	0.5848779422953765	0.3119596907729313	1	2.9345794392523357	Over	P31725	S100a9
GO:0032506	cytokinetic process	P	0.5848779422953765	0.3119596907729313	1	2.9345794392523357	Over	Q8VDD5	Myh9
GO:0042720	mitochondrial inner membrane peptidase complex	C	0.5848779422953765	0.3119596907729313	1	2.9345794392523357	Over	Q9CWJ9	Atic
GO:0035425	autocrine signaling	P	0.5848779422953765	0.3119596907729313	1	2.9345794392523357	Over	P31725	S100a9
GO:1903428	positive regulation of reactive oxygen species biosynthetic process	P	0.5848779422953765	0.3119596907729313	1	2.9345794392523357	Over	P29788	Vtn
GO:1990869	cellular response to chemokine	P	0.5848779422953765	0.3119596907729313	1	2.9345794392523357	Over	P63001	Rac1
GO:0032570	response to progesterone	P	0.5848779422953765	0.3119596907729313	1	2.9345794392523357	Over	P49817	Cav1
GO:0042994	cytoplasmic sequestering of transcription factor	P	0.5848779422953765	0.3119596907729313	1	2.9345794392523357	Over	Q6P069	Sri
GO:0045184	establishment of protein localization	P	0.5848779422953765	0.3119596907729313	1	2.9345794392523357	Over	P0CG50	Ubc
GO:0032590	dendrite membrane	C	0.5848779422953765	0.3119596907729313	1	2.9345794392523357	Over	P01831	Thy1
GO:0032596	protein transport into membrane raft	P	0.5848779422953765	0.3119596907729313	1	2.9345794392523357	Over	Q9JM62	Reep6
GO:0001776	leukocyte homeostasis	P	0.5848779422953765	0.3119596907729313	1	2.9345794392523357	Over	Q9Z126	Pf4
GO:0042567	insulin-like growth factor ternary complex	C	0.5848779422953765	0.3119596907729313	1	2.9345794392523357	Over	P47878	Igfbp3
GO:0003872	6-phosphofructokinase activity	F	0.5848779422953765	0.3119596907729313	1	2.9345794392523357	Over	P47857	Pfkm
GO:0032642	regulation of chemokine production	P	0.5848779422953765	0.3119596907729313	1	2.9345794392523357	Over	Q9Z126	Pf4
GO:0032707	negative regulation of interleukin-23 production	P	0.5848779422953765	0.3119596907729313	1	2.9345794392523357	Over	P63001	Rac1
GO:1905684	regulation of plasma membrane repair	P	0.5848779422953765	0.3119596907729313	1	2.9345794392523357	Over	Q8VDD5	Myh9
GO:0042476	odontogenesis	P	0.5848779422953765	0.3119596907729313	1	2.9345794392523357	Over	P63001	Rac1
GO:0001816	cytokine production	P	0.5848779422953765	0.3119596907729313	1	2.9345794392523357	Over	Q8CFX1	H6pd
GO:0032757	positive regulation of interleukin-8 production	P	0.5848779422953765	0.3119596907729313	1	2.9345794392523357	Over	Q61805	Lbp
GO:0042448	progesterone metabolic process	P	0.5848779422953765	0.3119596907729313	1	2.9345794392523357	Over	O88451	Rdh7
GO:1905077	negative regulation of interleukin-17 secretion	P	0.5848779422953765	0.3119596907729313	1	2.9345794392523357	Over	A2AN08	Ubr4
GO:0042584	chromaffin granule membrane	C	0.5848779422953765	0.3119596907729313	1	2.9345794392523357	Over	Q6P069	Sri
GO:0002089	lens morphogenesis in camera-type eye	P	0.5848779422953765	0.3119596907729313	1	2.9345794392523357	Over	P14602	Hspb1
GO:0008209	androgen metabolic process	P	0.5848779422953765	0.3119596907729313	1	2.9345794392523357	Over	O88451	Rdh7
GO:0010656	negative regulation of muscle cell apoptotic process	P	0.5848779422953765	0.3119596907729313	1	2.9345794392523357	Over	P49817	Cav1
GO:0071593	lymphocyte aggregation	P	0.5848779422953765	0.3119596907729313	1	2.9345794392523357	Over	P63001	Rac1
GO:0060347	heart trabecula formation	P	0.5848779422953765	0.3119596907729313	1	2.9345794392523357	Over	P49817	Cav1
GO:0051835	positive regulation of synapse structural plasticity	P	0.5848779422953765	0.3119596907729313	1	2.9345794392523357	Over	P63001	Rac1
GO:0060351	cartilage development involved in endochondral bone morphogenesis	P	0.5848779422953765	0.3119596907729313	1	2.9345794392523357	Over	P11087	Col1a1
GO:0051659	maintenance of mitochondrion location	P	0.5848779422953765	0.3119596907729313	1	2.9345794392523357	Over	O55143	Atp2a2
GO:0019905	syntaxin binding	F	0.5848779422953765	0.3119596907729313	1	2.9345794392523357	Over	P49817	Cav1
GO:0071495	cellular response to endogenous stimulus	P	0.5848779422953765	0.3119596907729313	1	2.9345794392523357	Over	O55143	Atp2a2
GO:0005890	sodium:potassium-exchanging ATPase complex	C	0.5848779422953765	0.3119596907729313	1	2.9345794392523357	Over	O55143	Atp2a2
GO:0006940	regulation of smooth muscle contraction	P	0.5848779422953765	0.3119596907729313	1	2.9345794392523357	Over	P49817	Cav1
GO:0020005	symbiont-containing vacuole membrane	C	0.5848779422953765	0.3119596907729313	1	2.9345794392523357	Over	Q9Z126	Pf4
GO:0051642	centrosome localization	P	0.5848779422953765	0.3119596907729313	1	2.9345794392523357	Over	P17742	Ppia
GO:0006972	hyperosmotic response	P	0.5848779422953765	0.3119596907729313	1	2.9345794392523357	Over	P63001	Rac1
GO:0051561	positive regulation of mitochondrial calcium ion concentration	P	0.5848779422953765	0.3119596907729313	1	2.9345794392523357	Over	O55143	Atp2a2
GO:0051453	regulation of intracellular pH	P	0.5848779422953765	0.3119596907729313	1	2.9345794392523357	Over	P04919	Slc4a1
GO:0051403	stress-activated MAPK cascade	P	0.5848779422953765	0.3119596907729313	1	2.9345794392523357	Over	P23927	Cryab
GO:0021799	cerebral cortex radially oriented cell migration	P	0.5848779422953765	0.3119596907729313	1	2.9345794392523357	Over	P63001	Rac1
GO:0021831	embryonic olfactory bulb interneuron precursor migration	P	0.5848779422953765	0.3119596907729313	1	2.9345794392523357	Over	P63001	Rac1
GO:0021861	forebrain radial glial cell differentiation	P	0.5848779422953765	0.3119596907729313	1	2.9345794392523357	Over	P63001	Rac1
GO:0060501	positive regulation of epithelial cell proliferation involved in lung morphogenesis	P	0.5848779422953765	0.3119596907729313	1	2.9345794392523357	Over	P63001	Rac1
GO:0021894	cerebral cortex GABAergic interneuron development	P	0.5848779422953765	0.3119596907729313	1	2.9345794392523357	Over	P63001	Rac1
GO:0022008	neurogenesis	P	0.5848779422953765	0.3119596907729313	1	2.9345794392523357	Over	P47878	Igfbp3
GO:0022414	reproductive process	P	0.5848779422953765	0.3119596907729313	1	2.9345794392523357	Over	O55143	Atp2a2
GO:0010762	regulation of fibroblast migration	P	0.5848779422953765	0.3119596907729313	1	2.9345794392523357	Over	P63001	Rac1
GO:0097452	GAIT complex	C	0.5848779422953765	0.3119596907729313	1	2.9345794392523357	Over	P16858	Gapdh
GO:0090050	positive regulation of cell migration involved in sprouting angiogenesis	P	0.5848779422953765	0.3119596907729313	1	2.9345794392523357	Over	P63001	Rac1
GO:0023057	negative regulation of signaling	P	0.5848779422953765	0.3119596907729313	1	2.9345794392523357	Over	Q9EQK5	Mvp
GO:0060753	regulation of mast cell chemotaxis	P	0.5848779422953765	0.3119596907729313	1	2.9345794392523357	Over	P63001	Rac1
GO:0014041	regulation of neuron maturation	P	0.5848779422953765	0.3119596907729313	1	2.9345794392523357	Over	P63001	Rac1
GO:0093001	glycolysis from storage polysaccharide through glucose-1-phosphate	P	0.5848779422953765	0.3119596907729313	1	2.9345794392523357	Over	P47857	Pfkm
GO:0090630	activation of GTPase activity	P	0.5848779422953765	0.3119596907729313	1	2.9345794392523357	Over	P63001	Rac1
GO:0060325	face morphogenesis	P	0.5848779422953765	0.3119596907729313	1	2.9345794392523357	Over	P11087	Col1a1
GO:0006491	N-glycan processing	P	0.5848779422953765	0.3119596907729313	1	2.9345794392523357	Over	Q8BHN3	Ganab
GO:0055093	response to hyperoxia	P	0.5848779422953765	0.3119596907729313	1	2.9345794392523357	Over	P11087	Col1a1
GO:0016605	PML body	C	0.5848779422953765	0.3119596907729313	1	2.9345794392523357	Over	P15702	Spn
GO:0055118	negative regulation of cardiac muscle contraction	P	0.5848779422953765	0.3119596907729313	1	2.9345794392523357	Over	Q6P069	Sri
GO:0060071	Wnt signaling pathway, planar cell polarity pathway	P	0.5848779422953765	0.3119596907729313	1	2.9345794392523357	Over	P63001	Rac1
GO:0090135	actin filament branching	P	0.5848779422953765	0.3119596907729313	1	2.9345794392523357	Over	P63001	Rac1
GO:0006189	'de novo' IMP biosynthetic process	P	0.5848779422953765	0.3119596907729313	1	2.9345794392523357	Over	Q9CWJ9	Atic
GO:0090201	negative regulation of release of cytochrome c from mitochondria	P	0.5848779422953765	0.3119596907729313	1	2.9345794392523357	Over	P17742	Ppia
GO:0018874	benzoate metabolic process	P	0.5848779422953765	0.3119596907729313	1	2.9345794392523357	Over	Q8CAY6	Acat2
GO:0060091	kinocilium	C	0.5848779422953765	0.3119596907729313	1	2.9345794392523357	Over	P63001	Rac1
GO:0086004	regulation of cardiac muscle cell contraction	P	0.5848779422953765	0.3119596907729313	1	2.9345794392523357	Over	Q6P069	Sri
GO:0006111	regulation of gluconeogenesis	P	0.5848779422953765	0.3119596907729313	1	2.9345794392523357	Over	P17742	Ppia
GO:0019012	virion	C	0.5848779422953765	0.3119596907729313	1	2.9345794392523357	Over	P48759	Ptx3
GO:0060762	regulation of branching involved in mammary gland duct morphogenesis	P	0.5848779422953765	0.3119596907729313	1	2.9345794392523357	Over	P49817	Cav1
GO:0060193	positive regulation of lipase activity	P	0.5848779422953765	0.3119596907729313	1	2.9345794392523357	Over	P63001	Rac1
GO:0006084	acetyl-CoA metabolic process	P	0.5848779422953765	0.3119596907729313	1	2.9345794392523357	Over	Q8CAY6	Acat2
GO:0006029	proteoglycan metabolic process	P	0.5848779422953765	0.3119596907729313	1	2.9345794392523357	Over	P11087	Col1a1
GO:0071987	WD40-repeat domain binding	F	0.5848779422953765	0.3119596907729313	1	2.9345794392523357	Over	P80317	Cct6a
GO:0015293	symporter activity	F	0.5848779422953765	0.3119596907729313	1	2.9345794392523357	Over	P04919	Slc4a1
GO:0019373	epoxygenase P450 pathway	P	0.5848779422953765	0.3119596907729313	1	2.9345794392523357	Over	P33267	Cyp2f2
GO:0014912	negative regulation of smooth muscle cell migration	P	0.5848779422953765	0.3119596907729313	1	2.9345794392523357	Over	P47878	Igfbp3
GO:0005977	glycogen metabolic process	P	0.5848779422953765	0.3119596907729313	1	2.9345794392523357	Over	Q91ZJ5	Ugp2
GO:0051988	regulation of attachment of spindle microtubules to kinetochore	P	0.5848779422953765	0.3119596907729313	1	2.9345794392523357	Over	P63001	Rac1
GO:0019676	ammonia assimilation cycle	P	0.5848779422953765	0.3119596907729313	1	2.9345794392523357	Over	Q91YI0	Asl
GO:0005945	6-phosphofructokinase complex	C	0.5848779422953765	0.3119596907729313	1	2.9345794392523357	Over	P47857	Pfkm
GO:0019800	peptide cross-linking via chondroitin 4-sulfate glycosaminoglycan	P	0.5848779422953765	0.3119596907729313	1	2.9345794392523357	Over	P28653	Bgn
GO:0051932	synaptic transmission, GABAergic	P	0.5848779422953765	0.3119596907729313	1	2.9345794392523357	Over	P63001	Rac1
GO:0071614	linoleic acid epoxygenase activity	F	0.5848779422953765	0.3119596907729313	1	2.9345794392523357	Over	P33267	Cyp2f2
GO:0060263	regulation of respiratory burst	P	0.5848779422953765	0.3119596907729313	1	2.9345794392523357	Over	P63001	Rac1
GO:0097498	endothelial tube lumen extension	P	0.5848779422953765	0.3119596907729313	1	2.9345794392523357	Over	P63001	Rac1
GO:0060613	fat pad development	P	0.5848779422953765	0.3119596907729313	1	2.9345794392523357	Over	P0CG50	Ubc
GO:0005796	Golgi lumen	C	0.5848779422953765	0.3119596907729313	1	2.9345794392523357	Over	P29788	Vtn
GO:0070488	neutrophil aggregation	P	0.5848779422953765	0.3119596907729313	1	2.9345794392523357	Over	P31725	S100a9
GO:0007525	somatic muscle development	P	0.5848779422953765	0.3119596907729313	1	2.9345794392523357	Over	P23927	Cryab
GO:0030021	extracellular matrix structural constituent conferring compression resistance	F	0.5848779422953765	0.3119596907729313	1	2.9345794392523357	Over	P28653	Bgn
GO:0030521	androgen receptor signaling pathway	P	0.5848779422953765	0.3119596907729313	1	2.9345794392523357	Over	P63001	Rac1
GO:0070006	metalloaminopeptidase activity	F	0.5848779422953765	0.3119596907729313	1	2.9345794392523357	Over	Q9Z2W0	Dnpep
GO:0101020	estrogen 16-alpha-hydroxylase activity	F	0.5848779422953765	0.3119596907729313	1	2.9345794392523357	Over	P33267	Cyp2f2
GO:0102250	linear malto-oligosaccharide phosphorylase activity	F	0.5848779422953765	0.3119596907729313	1	2.9345794392523357	Over	Q9WUB3	Pygm
GO:0050806	positive regulation of synaptic transmission	P	0.5848779422953765	0.3119596907729313	1	2.9345794392523357	Over	P31725	S100a9
GO:0030838	positive regulation of actin filament polymerization	P	0.5848779422953765	0.3119596907729313	1	2.9345794392523357	Over	P63001	Rac1
GO:0102499	SHG alpha-glucan phosphorylase activity	F	0.5848779422953765	0.3119596907729313	1	2.9345794392523357	Over	Q9WUB3	Pygm
GO:0005536	glucose binding	F	0.5848779422953765	0.3119596907729313	1	2.9345794392523357	Over	Q91ZJ5	Ugp2
GO:0050786	RAGE receptor binding	F	0.5848779422953765	0.3119596907729313	1	2.9345794392523357	Over	P31725	S100a9
GO:0005534	galactose binding	F	0.5848779422953765	0.3119596907729313	1	2.9345794392523357	Over	P41317	Mbl2
GO:0150062	complement-mediated synapse pruning	P	0.5848779422953765	0.3119596907729313	1	2.9345794392523357	Over	P98086	C1qa
GO:0009057	macromolecule catabolic process	P	0.5848779422953765	0.3119596907729313	1	2.9345794392523357	Over	Q6P069	Sri
GO:0030903	notochord development	P	0.5848779422953765	0.3119596907729313	1	2.9345794392523357	Over	P11087	Col1a1
GO:0008585	female gonad development	P	0.5848779422953765	0.3119596907729313	1	2.9345794392523357	Over	P0CG50	Ubc
GO:0008553	proton-exporting ATPase activity, phosphorylative mechanism	F	0.5848779422953765	0.3119596907729313	1	2.9345794392523357	Over	O55143	Atp2a2
GO:0008401	retinoic acid 4-hydroxylase activity	F	0.5848779422953765	0.3119596907729313	1	2.9345794392523357	Over	P33267	Cyp2f2
GO:0070095	fructose-6-phosphate binding	F	0.5848779422953765	0.3119596907729313	1	2.9345794392523357	Over	P47857	Pfkm
GO:0150064	vertebrate eye-specific patterning	P	0.5848779422953765	0.3119596907729313	1	2.9345794392523357	Over	P98086	C1qa
GO:0070063	RNA polymerase binding	F	0.5848779422953765	0.3119596907729313	1	2.9345794392523357	Over	P17742	Ppia
GO:0050544	arachidonic acid binding	F	0.5848779422953765	0.3119596907729313	1	2.9345794392523357	Over	P31725	S100a9
GO:0008184	glycogen phosphorylase activity	F	0.5848779422953765	0.3119596907729313	1	2.9345794392523357	Over	Q9WUB3	Pygm
GO:0008191	metalloendopeptidase inhibitor activity	F	0.5848779422953765	0.3119596907729313	1	2.9345794392523357	Over	P39876	Timp3
GO:0062013	positive regulation of small molecule metabolic process	P	0.5848779422953765	0.3119596907729313	1	2.9345794392523357	Over	P98086	C1qa
GO:0008240	tripeptidyl-peptidase activity	F	0.5848779422953765	0.3119596907729313	1	2.9345794392523357	Over	Q64514	Tpp2
GO:0005584	collagen type I trimer	C	0.5848779422953765	0.3119596907729313	1	2.9345794392523357	Over	P11087	Col1a1
GO:0030479	actin cortical patch	C	0.5848779422953765	0.3119596907729313	1	2.9345794392523357	Over	P47754	Capza2
GO:0070309	lens fiber cell morphogenesis	P	0.5848779422953765	0.3119596907729313	1	2.9345794392523357	Over	P23927	Cryab
GO:0061621	canonical glycolysis	P	0.5848779422953765	0.3119596907729313	1	2.9345794392523357	Over	P47857	Pfkm
GO:0010508	positive regulation of autophagy	P	0.5848779422953765	0.3119596907729313	1	2.9345794392523357	Over	P28653	Bgn
GO:0010256	endomembrane system organization	P	0.5848779422953765	0.3119596907729313	1	2.9345794392523357	Over	Q9JM62	Reep6
GO:0071223	cellular response to lipoteichoic acid	P	0.5848779422953765	0.3119596907729313	1	2.9345794392523357	Over	Q61805	Lbp
GO:0051028	mRNA transport	P	0.5848779422953765	0.3119596907729313	1	2.9345794392523357	Over	P17742	Ppia
GO:0070891	lipoteichoic acid binding	F	0.5848779422953765	0.3119596907729313	1	2.9345794392523357	Over	Q61805	Lbp
GO:0099641	anterograde axonal protein transport	P	0.5848779422953765	0.3119596907729313	1	2.9345794392523357	Over	P14602	Hspb1
GO:0051001	negative regulation of nitric-oxide synthase activity	P	0.5848779422953765	0.3119596907729313	1	2.9345794392523357	Over	P49817	Cav1
GO:0050965	detection of temperature stimulus involved in sensory perception of pain	P	0.5848779422953765	0.3119596907729313	1	2.9345794392523357	Over	P29788	Vtn
GO:0007267	cell-cell signaling	P	0.5848779422953765	0.3119596907729313	1	2.9345794392523357	Over	P01831	Thy1
GO:0061299	retina vasculature morphogenesis in camera-type eye	P	0.5848779422953765	0.3119596907729313	1	2.9345794392523357	Over	P63001	Rac1
GO:0070836	caveola assembly	P	0.5848779422953765	0.3119596907729313	1	2.9345794392523357	Over	P49817	Cav1
GO:0055065	metal ion homeostasis	P	0.5848779422953765	0.3119596907729313	1	2.9345794392523357	Over	P33587	Proc
GO:0030331	estrogen receptor binding	F	0.5848779422953765	0.3119596907729313	1	2.9345794392523357	Over	P17742	Ppia
GO:0009889	regulation of biosynthetic process	P	0.5848779422953765	0.3119596907729313	1	2.9345794392523357	Over	P04247	Mb
GO:0099150	regulation of postsynaptic specialization assembly	P	0.5848779422953765	0.3119596907729313	1	2.9345794392523357	Over	P48759	Ptx3
GO:0050913	sensory perception of bitter taste	P	0.5848779422953765	0.3119596907729313	1	2.9345794392523357	Over	Q9JM62	Reep6
GO:0061383	trabecula morphogenesis	P	0.5848779422953765	0.3119596907729313	1	2.9345794392523357	Over	P63001	Rac1
GO:0009893	positive regulation of metabolic process	P	0.5848779422953765	0.3119596907729313	1	2.9345794392523357	Over	P09542	Myl3
GO:0046872	metal ion binding	F	0.6014641822135949	0.3211887559182579	11	1.3175662788479878	Over	P47857,P17742,P04247,P49429,P0CG50,O09173,P11087,P23927,P98086,P80318,Q91ZJ5	Pfkm,Ppia,Mb,Hpd,Ubc,Hgd,Col1a1,Cryab,C1qa,Cct3,Ugp2
GO:0005201	extracellular matrix structural constituent	F	0.6138411228491609	0.3306280525381906	1	0.3452446399120395	Under	P82198	Tgfbi
GO:0043524	negative regulation of neuron apoptotic process	P	0.6138411228491609	0.3306280525381906	1	0.3452446399120395	Under	P63001	Rac1
GO:0098794	postsynapse	C	0.6138411228491609	0.3306280525381906	1	0.3452446399120395	Under	P98086	C1qa
GO:0051260	protein homooligomerization	P	0.6138411228491609	0.3306280525381906	1	0.3452446399120395	Under	P41317	Mbl2
GO:0000287	magnesium ion binding	F	0.6138411228491609	0.3306280525381906	1	0.3452446399120395	Under	Q6P069	Sri
GO:0007283	spermatogenesis	P	0.6138411228491609	0.33131030724662275	1	0.36682242990654196	Under	P31725	S100a9
GO:0050804	modulation of chemical synaptic transmission	P	0.6138411228491609	0.33131030724662275	1	0.36682242990654196	Under	P99024	Tubb5
GO:0010468	regulation of gene expression	P	0.6138411228491609	0.33131030724662275	1	0.36682242990654196	Under	P15702	Spn
GO:0042612	MHC class I protein complex	C	0.6138411228491609	0.33131030724662275	1	0.36682242990654196	Under	P99024	Tubb5
GO:0001701	in utero embryonic development	P	0.6138902442724584	0.3345851054240556	3	0.550233644859813	Under	O88451,Q91WP6,Q8VDD5	Rdh7,Serpina3n,Myh9
GO:0010629	negative regulation of gene expression	P	0.6138902442724584	0.33582409817734166	1	0.3260643821391484	Under	P14602	Hspb1
GO:0009986	cell surface	C	0.6138902442724584	0.3376621329140901	6	0.6772106398274623	Under	O70570,P23927,P49817,P04919,Q61805,P28653	Pigr,Cryab,Cav1,Slc4a1,Lbp,Bgn
GO:0045944	positive regulation of transcription by RNA polymerase II	P	0.6138902442724584	0.3383956013375509	3	0.5335598980458793	Under	Q9Z126,P47857,P63001	Pf4,Pfkm,Rac1
GO:2000406	positive regulation of T cell migration	P	0.6138902442724584	0.3407032315637993	2	1.6769025367156207	Over	P63001,P15702	Rac1,Spn
GO:0016209	antioxidant activity	F	0.6138902442724584	0.3407032315637993	2	1.6769025367156207	Over	P31725,Q61646	S100a9,Hp
GO:0042102	positive regulation of T cell proliferation	P	0.6138902442724584	0.3407032315637993	2	1.6769025367156207	Over	P15702,P04919	Spn,Slc4a1
GO:0006568	tryptophan metabolic process	P	0.6138902442724584	0.3407032315637993	2	1.6769025367156207	Over	Q8R0Y6,Q8CAY6	Aldh1l1,Acat2
GO:0014883	transition between fast and slow fiber	P	0.6138902442724584	0.3407032315637993	2	1.6769025367156207	Over	O55143,Q8VDD5	Atp2a2,Myh9
GO:0071347	cellular response to interleukin-1	P	0.6138902442724584	0.3407032315637993	2	1.6769025367156207	Over	P05367,P05366	Saa2,Saa1
GO:0071230	cellular response to amino acid stimulus	P	0.6138902442724584	0.3407032315637993	2	1.6769025367156207	Over	P11087,Q04857	Col1a1,Col6a1
GO:0015976	carbon utilization	P	0.6138902442724584	0.3407032315637993	2	1.6769025367156207	Over	Q91Y97,P05064	Aldob,Aldoa
GO:0031234	extrinsic component of cytoplasmic side of plasma membrane	C	0.6138902442724584	0.3407032315637993	2	1.6769025367156207	Over	P63001,O55143	Rac1,Atp2a2
GO:0031090	organelle membrane	C	0.6138902442724584	0.3407032315637993	2	1.6769025367156207	Over	Q60605,P09542	Myl6,Myl3
GO:0090263	positive regulation of canonical Wnt signaling pathway	P	0.6138902442724584	0.3407032315637993	2	1.6769025367156207	Over	P11087,P49817	Col1a1,Cav1
GO:0030315	T-tubule	C	0.6138902442724584	0.3407032315637993	2	1.6769025367156207	Over	Q6P069,P49817	Sri,Cav1
GO:0051591	response to cAMP	P	0.6138902442724584	0.3407032315637993	2	1.6769025367156207	Over	P11087,Q9WUB3	Col1a1,Pygm
GO:0050714	positive regulation of protein secretion	P	0.6138902442724584	0.3407032315637993	2	1.6769025367156207	Over	P17742,Q8VDD5	Ppia,Myh9
GO:0048488	synaptic vesicle endocytosis	P	0.6138902442724584	0.3407032315637993	2	1.6769025367156207	Over	P60710,P68134	Actb,Acta1
GO:0022603	regulation of anatomical structure morphogenesis	P	0.6138902442724584	0.3407032315637993	2	1.6769025367156207	Over	P31725,P28653	S100a9,Bgn
GO:1902533	positive regulation of intracellular signal transduction	P	0.6138902442724584	0.3407032315637993	2	1.6769025367156207	Over	P33587,P98086	Proc,C1qa
GO:0048168	regulation of neuronal synaptic plasticity	P	0.6138902442724584	0.3407032315637993	2	1.6769025367156207	Over	P63001,P31725	Rac1,S100a9
GO:0050873	brown fat cell differentiation	P	0.6138902442724584	0.3407032315637993	2	1.6769025367156207	Over	Q63836,P04247	Selenbp2,Mb
GO:0090324	negative regulation of oxidative phosphorylation	P	0.6138902442724584	0.3407032315637993	2	1.6769025367156207	Over	P63001,P17742	Rac1,Ppia
GO:2000026	regulation of multicellular organismal development	P	0.6231375130139167	0.34623152344193464	5	1.544515494343335	Over	P0CG50,Q6P069,P23927,P98086,P28653	Ubc,Sri,Cryab,C1qa,Bgn
GO:0020037	heme binding	F	0.6362563191860312	0.36116349480350884	5	1.467289719626168	Over	P04247,P33267,Q8CIM7,P11714,P24456	Mb,Cyp2f2,Cyp2d26,Cyp2d9,Cyp2d10
GO:0045298	tubulin complex	C	0.6362563191860312	0.36116349480350884	5	1.467289719626168	Over	P31725,P99024,P23927,P49817,P16858	S100a9,Tubb5,Cryab,Cav1,Gapdh
GO:0005102	signaling receptor binding	F	0.6362563191860312	0.37676235741788305	4	0.6019650131799663	Under	P98086,P41317,Q61805,P39876	C1qa,Mbl2,Lbp,Timp3
GO:0012505	endomembrane system	C	0.6362563191860312	0.3799342970941928	5	1.3974187805963507	Over	Q64514,P42932,Q91WP6,P41317,P80313	Tpp2,Cct8,Serpina3n,Mbl2,Cct7
GO:0042221	response to chemical	P	0.6362563191860312	0.3863097058684768	3	1.7607476635514017	Over	Q60605,P09542,Q8CAY6	Myl6,Myl3,Acat2
GO:0019731	antibacterial humoral response	P	0.6362563191860312	0.3863097058684768	3	1.7607476635514017	Over	P01867,P01864,P01868	Igh-3,-,Ighg1
GO:0060348	bone development	P	0.6362563191860312	0.3863097058684768	3	1.7607476635514017	Over	P17742,P29788,P28653	Ppia,Vtn,Bgn
GO:0045807	positive regulation of endocytosis	P	0.6362563191860312	0.3863097058684768	3	1.7607476635514017	Over	P01867,P01864,P01868	Igh-3,-,Ighg1
GO:0008283	cell population proliferation	P	0.6362563191860312	0.3863097058684768	3	1.7607476635514017	Over	Q9EQK5,P82198,Q8VDD5	Mvp,Tgfbi,Myh9
GO:0016529	sarcoplasmic reticulum	C	0.6362563191860312	0.3863097058684768	3	1.7607476635514017	Over	P31725,Q8CFX1,Q9WUB3	S100a9,H6pd,Pygm
GO:0031012	extracellular matrix	C	0.6362563191860312	0.40009303407553193	2	0.5103616416091019	Under	P28653,Q04857,P11087,P48759,A6X935	Bgn,Col6a1,Col1a1,Ptx3,Itih4
GO:0005667	transcription factor complex	C	0.6362563191860312	0.40380685506141745	2	0.4890965732087227	Under	P60710,P68134	Actb,Acta1
GO:0003735	structural constituent of ribosome	F	0.6362563191860312	0.4102019202322945	3	1.600679694137638	Over	P47963,P62889,P61358	Rpl13,Rpl30,Rpl27
GO:0006096	glycolytic process	P	0.6362563191860312	0.4102019202322945	3	1.600679694137638	Over	P04919,Q8R0Y6,Q8BMF4	Slc4a1,Aldh1l1,Dlat
GO:0016887	ATPase activity	F	0.6362563191860312	0.4102019202322945	3	1.600679694137638	Over	P60710,O55143,P68134	Actb,Atp2a2,Acta1
GO:0007605	sensory perception of sound	P	0.6362563191860312	0.4102019202322945	3	1.600679694137638	Over	Q8K0D2,Q9R098,Q8VDD5	Habp2,Hgfac,Myh9
GO:0005819	spindle	C	0.6362563191860312	0.4102019202322945	3	1.600679694137638	Over	P09542,Q8VDD5,P14602	Myl3,Myh9,Hspb1
GO:0051240	positive regulation of multicellular organismal process	P	0.6362563191860312	0.4114310507051918	6	1.4085981308411215	Over	P0CG50,P01029,P98086,Q8K0D2,Q9R098,P28653	Ubc,C4b,C1qa,Habp2,Hgfac,Bgn
GO:0005581	collagen trimer	C	0.6362563191860312	0.4114310507051918	6	1.4085981308411215	Over	P17742,Q04857,P82198,P98086,P41317,P28653	Ppia,Col6a1,Tgfbi,C1qa,Mbl2,Bgn
GO:0031625	ubiquitin protein ligase binding	F	0.6362563191860312	0.42254803881738834	6	1.3544212796549246	Over	P99024,P0CG50,P68368,P60710,P68134,P11983	Tubb5,Ubc,Tuba4a,Actb,Acta1,Tcp1
GO:0050916	sensory perception of sweet taste	P	0.6362563191860312	0.4295640247778545	1	1.9563862928348907	Over	Q9JM62	Reep6
GO:0044829	positive regulation by host of viral genome replication	P	0.6362563191860312	0.4295640247778545	1	1.9563862928348907	Over	P17742	Ppia
GO:0050901	leukocyte tethering or rolling	P	0.6362563191860312	0.4295640247778545	1	1.9563862928348907	Over	P15702	Spn
GO:0070852	cell body fiber	C	0.6362563191860312	0.4295640247778545	1	1.9563862928348907	Over	Q91YI0	Asl
GO:0051022	Rho GDP-dissociation inhibitor binding	F	0.6362563191860312	0.4295640247778545	1	1.9563862928348907	Over	P63001	Rac1
GO:0048251	elastic fiber assembly	P	0.6362563191860312	0.4295640247778545	1	1.9563862928348907	Over	Q8VDD5	Myh9
GO:0098911	regulation of ventricular cardiac muscle cell action potential	P	0.6362563191860312	0.4295640247778545	1	1.9563862928348907	Over	P49817	Cav1
GO:0048027	mRNA 5'-UTR binding	F	0.6362563191860312	0.4295640247778545	1	1.9563862928348907	Over	Q8VDD5	Myh9
GO:0070997	neuron death	P	0.6362563191860312	0.4295640247778545	1	1.9563862928348907	Over	Q9Z126	Pf4
GO:1903427	negative regulation of reactive oxygen species biosynthetic process	P	0.6362563191860312	0.4295640247778545	1	1.9563862928348907	Over	P63001	Rac1
GO:0070491	repressing transcription factor binding	F	0.6362563191860312	0.4295640247778545	1	1.9563862928348907	Over	Q6P069	Sri
GO:0048706	embryonic skeletal system development	P	0.6362563191860312	0.4295640247778545	1	1.9563862928348907	Over	P11087	Col1a1
GO:0048738	cardiac muscle tissue development	P	0.6362563191860312	0.4295640247778545	1	1.9563862928348907	Over	Q8R0Y6	Aldh1l1
GO:0070013	intracellular organelle lumen	C	0.6362563191860312	0.4295640247778545	1	1.9563862928348907	Over	Q8CAY6	Acat2
GO:0048739	cardiac muscle fiber development	P	0.6362563191860312	0.4295640247778545	1	1.9563862928348907	Over	Q8VDD5	Myh9
GO:0048856	anatomical structure development	P	0.6362563191860312	0.4295640247778545	1	1.9563862928348907	Over	Q8BHN3	Ganab
GO:1900744	regulation of p38MAPK cascade	P	0.6362563191860312	0.4295640247778545	1	1.9563862928348907	Over	P49817	Cav1
GO:0050764	regulation of phagocytosis	P	0.6362563191860312	0.4295640247778545	1	1.9563862928348907	Over	O70570	Pigr
GO:2000678	negative regulation of transcription regulatory region DNA binding	P	0.6362563191860312	0.4295640247778545	1	1.9563862928348907	Over	Q6P069	Sri
GO:0070141	response to UV-A	P	0.6362563191860312	0.4295640247778545	1	1.9563862928348907	Over	P23927	Cryab
GO:0050877	nervous system process	P	0.6362563191860312	0.4295640247778545	1	1.9563862928348907	Over	O55143	Atp2a2
GO:0070266	necroptotic process	P	0.6362563191860312	0.4295640247778545	1	1.9563862928348907	Over	Q9WUB3	Pygm
GO:0050832	defense response to fungus	P	0.6362563191860312	0.4295640247778545	1	1.9563862928348907	Over	P16858	Gapdh
GO:0044319	wound healing, spreading of cells	P	0.6362563191860312	0.4295640247778545	1	1.9563862928348907	Over	P63001	Rac1
GO:0070273	phosphatidylinositol-4-phosphate binding	F	0.6362563191860312	0.4295640247778545	1	1.9563862928348907	Over	P41317	Mbl2
GO:0070384	Harderian gland development	P	0.6362563191860312	0.4295640247778545	1	1.9563862928348907	Over	Q8R0Y6	Aldh1l1
GO:0070403	NAD+ binding	F	0.6362563191860312	0.4295640247778545	1	1.9563862928348907	Over	Q8R0Y6	Aldh1l1
GO:0098839	postsynaptic density membrane	C	0.6362563191860312	0.4295640247778545	1	1.9563862928348907	Over	P14602	Hspb1
GO:0044342	type B pancreatic cell proliferation	P	0.6362563191860312	0.4295640247778545	1	1.9563862928348907	Over	P47878	Igfbp3
GO:0050860	negative regulation of T cell receptor signaling pathway	P	0.6362563191860312	0.4295640247778545	1	1.9563862928348907	Over	P01831	Thy1
GO:0048365	Rac GTPase binding	F	0.6362563191860312	0.4295640247778545	1	1.9563862928348907	Over	P49817	Cav1
GO:2000649	regulation of sodium ion transmembrane transporter activity	P	0.6362563191860312	0.4295640247778545	1	1.9563862928348907	Over	P49817	Cav1
GO:0051129	negative regulation of cellular component organization	P	0.6362563191860312	0.4295640247778545	1	1.9563862928348907	Over	P14602	Hspb1
GO:0051402	neuron apoptotic process	P	0.6362563191860312	0.4295640247778545	1	1.9563862928348907	Over	P16858	Gapdh
GO:0098742	cell-cell adhesion via plasma-membrane adhesion molecules	P	0.6362563191860312	0.4295640247778545	1	1.9563862928348907	Over	P29788	Vtn
GO:0072384	organelle transport along microtubule	P	0.6362563191860312	0.4295640247778545	1	1.9563862928348907	Over	P63001	Rac1
GO:0072686	mitotic spindle	C	0.6362563191860312	0.4295640247778545	1	1.9563862928348907	Over	P63001	Rac1
GO:0046039	GTP metabolic process	P	0.6362563191860312	0.4295640247778545	1	1.9563862928348907	Over	P63001	Rac1
GO:0045988	negative regulation of striated muscle contraction	P	0.6362563191860312	0.4295640247778545	1	1.9563862928348907	Over	O55143	Atp2a2
GO:0060174	limb bud formation	P	0.6362563191860312	0.4295640247778545	1	1.9563862928348907	Over	P11087	Col1a1
GO:0060166	olfactory pit development	P	0.6362563191860312	0.4295640247778545	1	1.9563862928348907	Over	Q8R0Y6	Aldh1l1
GO:1904115	axon cytoplasm	C	0.6362563191860312	0.4295640247778545	1	1.9563862928348907	Over	P14602	Hspb1
GO:0090242	retinoic acid receptor signaling pathway involved in somitogenesis	P	0.6362563191860312	0.4295640247778545	1	1.9563862928348907	Over	Q8R0Y6	Aldh1l1
GO:0060100	positive regulation of phagocytosis, engulfment	P	0.6362563191860312	0.4295640247778545	1	1.9563862928348907	Over	Q61805	Lbp
GO:1903919	negative regulation of actin filament severing	P	0.6362563191860312	0.4295640247778545	1	1.9563862928348907	Over	Q8VDD5	Myh9
GO:0045822	negative regulation of heart contraction	P	0.6362563191860312	0.4295640247778545	1	1.9563862928348907	Over	O55143	Atp2a2
GO:0048709	oligodendrocyte differentiation	P	0.6362563191860312	0.4295640247778545	1	1.9563862928348907	Over	P29788	Vtn
GO:0060090	molecular adaptor activity	F	0.6362563191860312	0.4295640247778545	1	1.9563862928348907	Over	Q6P069	Sri
GO:0090103	cochlea morphogenesis	P	0.6362563191860312	0.4295640247778545	1	1.9563862928348907	Over	P63001	Rac1
GO:0086036	regulation of cardiac muscle cell membrane potential	P	0.6362563191860312	0.4295640247778545	1	1.9563862928348907	Over	O55143	Atp2a2
GO:0086091	regulation of heart rate by cardiac conduction	P	0.6362563191860312	0.4295640247778545	1	1.9563862928348907	Over	P49817	Cav1
GO:1903531	negative regulation of secretion by cell	P	0.6362563191860312	0.4295640247778545	1	1.9563862928348907	Over	O70570	Pigr
GO:0055015	ventricular cardiac muscle cell development	P	0.6362563191860312	0.4295640247778545	1	1.9563862928348907	Over	Q8VDD5	Myh9
GO:0090051	negative regulation of cell migration involved in sprouting angiogenesis	P	0.6362563191860312	0.4295640247778545	1	1.9563862928348907	Over	P63001	Rac1
GO:0090279	regulation of calcium ion import	P	0.6362563191860312	0.4295640247778545	1	1.9563862928348907	Over	P49817	Cav1
GO:0090316	positive regulation of intracellular protein transport	P	0.6362563191860312	0.4295640247778545	1	1.9563862928348907	Over	P63001	Rac1
GO:0046325	negative regulation of glucose import	P	0.6362563191860312	0.4295640247778545	1	1.9563862928348907	Over	P63001	Rac1
GO:0071901	negative regulation of protein serine/threonine kinase activity	P	0.6362563191860312	0.4295640247778545	1	1.9563862928348907	Over	P14602	Hspb1
GO:2000177	regulation of neural precursor cell proliferation	P	0.6362563191860312	0.4295640247778545	1	1.9563862928348907	Over	P63001	Rac1
GO:0060997	dendritic spine morphogenesis	P	0.6362563191860312	0.4295640247778545	1	1.9563862928348907	Over	P63001	Rac1
GO:0051295	establishment of meiotic spindle localization	P	0.6362563191860312	0.4295640247778545	1	1.9563862928348907	Over	Q8VDD5	Myh9
GO:0051336	regulation of hydrolase activity	P	0.6362563191860312	0.4295640247778545	1	1.9563862928348907	Over	O70570	Pigr
GO:0097264	self proteolysis	P	0.6362563191860312	0.4295640247778545	1	1.9563862928348907	Over	Q6P069	Sri
GO:0060420	regulation of heart growth	P	0.6362563191860312	0.4295640247778545	1	1.9563862928348907	Over	Q8VDD5	Myh9
GO:0045198	establishment of epithelial cell apical/basal polarity	P	0.6362563191860312	0.4295640247778545	1	1.9563862928348907	Over	P63001	Rac1
GO:1905907	negative regulation of amyloid fibril formation	P	0.6362563191860312	0.4295640247778545	1	1.9563862928348907	Over	P23927	Cryab
GO:0045296	cadherin binding	F	0.6362563191860312	0.4295640247778545	1	1.9563862928348907	Over	P29788	Vtn
GO:0051233	spindle midzone	C	0.6362563191860312	0.4295640247778545	1	1.9563862928348907	Over	P63001	Rac1
GO:0097190	apoptotic signaling pathway	P	0.6362563191860312	0.4295640247778545	1	1.9563862928348907	Over	P15702	Spn
GO:0051668	localization within membrane	P	0.6362563191860312	0.4295640247778545	1	1.9563862928348907	Over	P63001	Rac1
GO:0051879	Hsp90 protein binding	F	0.6362563191860312	0.4295640247778545	1	1.9563862928348907	Over	P17742	Ppia
GO:0046638	positive regulation of alpha-beta T cell differentiation	P	0.6362563191860312	0.4295640247778545	1	1.9563862928348907	Over	P63001	Rac1
GO:0060346	bone trabecula formation	P	0.6362563191860312	0.4295640247778545	1	1.9563862928348907	Over	P11087	Col1a1
GO:0097009	energy homeostasis	P	0.6362563191860312	0.4295640247778545	1	1.9563862928348907	Over	P0CG50	Ubc
GO:0060324	face development	P	0.6362563191860312	0.4295640247778545	1	1.9563862928348907	Over	Q8R0Y6	Aldh1l1
GO:0051926	negative regulation of calcium ion transport	P	0.6362563191860312	0.4295640247778545	1	1.9563862928348907	Over	P49817	Cav1
GO:0046332	SMAD binding	F	0.6362563191860312	0.4295640247778545	1	1.9563862928348907	Over	P11087	Col1a1
GO:0071803	positive regulation of podosome assembly	P	0.6362563191860312	0.4295640247778545	1	1.9563862928348907	Over	P63001	Rac1
GO:0046685	response to arsenic-containing substance	P	0.6362563191860312	0.4295640247778545	1	1.9563862928348907	Over	P04919	Slc4a1
GO:0045919	positive regulation of cytolysis	P	0.6362563191860312	0.4295640247778545	1	1.9563862928348907	Over	Q61805	Lbp
GO:0032507	maintenance of protein location in cell	P	0.6362563191860312	0.4295640247778545	1	1.9563862928348907	Over	P49817	Cav1
GO:0010952	positive regulation of peptidase activity	P	0.6362563191860312	0.4295640247778545	1	1.9563862928348907	Over	P49817	Cav1
GO:0016601	Rac protein signal transduction	P	0.6362563191860312	0.4295640247778545	1	1.9563862928348907	Over	P63001	Rac1
GO:0016604	nuclear body	C	0.6362563191860312	0.4295640247778545	1	1.9563862928348907	Over	Q64514	Tpp2
GO:0016740	transferase activity	F	0.6362563191860312	0.4295640247778545	1	1.9563862928348907	Over	P0CG50	Ubc
GO:0035295	tube development	P	0.6362563191860312	0.4295640247778545	1	1.9563862928348907	Over	P29788	Vtn
GO:0035613	RNA stem-loop binding	F	0.6362563191860312	0.4295640247778545	1	1.9563862928348907	Over	Q8VDD5	Myh9
GO:0006637	acyl-CoA metabolic process	P	0.6362563191860312	0.4295640247778545	1	1.9563862928348907	Over	Q8BMF4	Dlat
GO:0006566	threonine metabolic process	P	0.6362563191860312	0.4295640247778545	1	1.9563862928348907	Over	O35490	Bhmt
GO:0035799	ureter maturation	P	0.6362563191860312	0.4295640247778545	1	1.9563862928348907	Over	Q8R0Y6	Aldh1l1
GO:0006563	L-serine metabolic process	P	0.6362563191860312	0.4295640247778545	1	1.9563862928348907	Over	O35490	Bhmt
GO:0006558	L-phenylalanine metabolic process	P	0.6362563191860312	0.4295640247778545	1	1.9563862928348907	Over	Q8R0Y6	Aldh1l1
GO:0038027	apolipoprotein A-I-mediated signaling pathway	P	0.6362563191860312	0.4295640247778545	1	1.9563862928348907	Over	P63001	Rac1
GO:0040018	positive regulation of multicellular organism growth	P	0.6362563191860312	0.4295640247778545	1	1.9563862928348907	Over	P17742	Ppia
GO:0006547	histidine metabolic process	P	0.6362563191860312	0.4295640247778545	1	1.9563862928348907	Over	Q8R0Y6	Aldh1l1
GO:0006544	glycine metabolic process	P	0.6362563191860312	0.4295640247778545	1	1.9563862928348907	Over	O35490	Bhmt
GO:0042129	regulation of T cell proliferation	P	0.6362563191860312	0.4295640247778545	1	1.9563862928348907	Over	P63001	Rac1
GO:0019482	beta-alanine metabolic process	P	0.6362563191860312	0.4295640247778545	1	1.9563862928348907	Over	Q8R0Y6	Aldh1l1
GO:0019862	IgA binding	F	0.6362563191860312	0.4295640247778545	1	1.9563862928348907	Over	O70570	Pigr
GO:0006364	rRNA processing	P	0.6362563191860312	0.4295640247778545	1	1.9563862928348907	Over	P61358	Rpl27
GO:0019887	protein kinase regulator activity	F	0.6362563191860312	0.4295640247778545	1	1.9563862928348907	Over	P63001	Rac1
GO:0006119	oxidative phosphorylation	P	0.6362563191860312	0.4295640247778545	1	1.9563862928348907	Over	O55143	Atp2a2
GO:0010666	positive regulation of cardiac muscle cell apoptotic process	P	0.6362563191860312	0.4295640247778545	1	1.9563862928348907	Over	P47878	Igfbp3
GO:0006090	pyruvate metabolic process	P	0.6362563191860312	0.4295640247778545	1	1.9563862928348907	Over	Q8CAY6	Acat2
GO:0006002	fructose 6-phosphate metabolic process	P	0.6362563191860312	0.4295640247778545	1	1.9563862928348907	Over	P47857	Pfkm
GO:0006939	smooth muscle contraction	P	0.6362563191860312	0.4295640247778545	1	1.9563862928348907	Over	Q8VDD5	Myh9
GO:0005859	muscle myosin complex	C	0.6362563191860312	0.4295640247778545	1	1.9563862928348907	Over	Q8VDD5	Myh9
GO:0034504	protein localization to nucleus	P	0.6362563191860312	0.4295640247778545	1	1.9563862928348907	Over	P11087	Col1a1
GO:0034145	positive regulation of toll-like receptor 4 signaling pathway	P	0.6362563191860312	0.4295640247778545	1	1.9563862928348907	Over	Q61805	Lbp
GO:0010608	posttranscriptional regulation of gene expression	P	0.6362563191860312	0.4295640247778545	1	1.9563862928348907	Over	P49817	Cav1
GO:0032102	negative regulation of response to external stimulus	P	0.6362563191860312	0.4295640247778545	1	1.9563862928348907	Over	P98086	C1qa
GO:0010039	response to iron ion	P	0.6362563191860312	0.4295640247778545	1	1.9563862928348907	Over	P98086	C1qa
GO:0010008	endosome membrane	C	0.6362563191860312	0.4295640247778545	1	1.9563862928348907	Over	P80318	Cct3
GO:0032386	regulation of intracellular transport	P	0.6362563191860312	0.4295640247778545	1	1.9563862928348907	Over	Q9JM62	Reep6
GO:0032464	positive regulation of protein homooligomerization	P	0.6362563191860312	0.4295640247778545	1	1.9563862928348907	Over	P63001	Rac1
GO:0043552	positive regulation of phosphatidylinositol 3-kinase activity	P	0.6362563191860312	0.4295640247778545	1	1.9563862928348907	Over	P63001	Rac1
GO:0008237	metallopeptidase activity	F	0.6362563191860312	0.4295640247778545	1	1.9563862928348907	Over	P98064	Masp1
GO:0008210	estrogen metabolic process	P	0.6362563191860312	0.4295640247778545	1	1.9563862928348907	Over	O88451	Rdh7
GO:0032720	negative regulation of tumor necrosis factor production	P	0.6362563191860312	0.4295640247778545	1	1.9563862928348907	Over	Q61805	Lbp
GO:0032722	positive regulation of chemokine production	P	0.6362563191860312	0.4295640247778545	1	1.9563862928348907	Over	Q61805	Lbp
GO:0032755	positive regulation of interleukin-6 production	P	0.6362563191860312	0.4295640247778545	1	1.9563862928348907	Over	Q61805	Lbp
GO:0008143	poly(A) binding	F	0.6362563191860312	0.4295640247778545	1	1.9563862928348907	Over	P17742	Ppia
GO:0031960	response to corticosteroid	P	0.6362563191860312	0.4295640247778545	1	1.9563862928348907	Over	P11087	Col1a1
GO:0032796	uropod organization	P	0.6362563191860312	0.4295640247778545	1	1.9563862928348907	Over	Q8VDD5	Myh9
GO:0007601	visual perception	P	0.6362563191860312	0.4295640247778545	1	1.9563862928348907	Over	P11087	Col1a1
GO:0032964	collagen biosynthetic process	P	0.6362563191860312	0.4295640247778545	1	1.9563862928348907	Over	P11087	Col1a1
GO:0007522	visceral muscle development	P	0.6362563191860312	0.4295640247778545	1	1.9563862928348907	Over	Q8VDD5	Myh9
GO:0007512	adult heart development	P	0.6362563191860312	0.4295640247778545	1	1.9563862928348907	Over	Q8VDD5	Myh9
GO:0033269	internode region of axon	C	0.6362563191860312	0.4295640247778545	1	1.9563862928348907	Over	P99024	Tubb5
GO:0031953	negative regulation of protein autophosphorylation	P	0.6362563191860312	0.4295640247778545	1	1.9563862928348907	Over	Q9EQK5	Mvp
GO:0033554	cellular response to stress	P	0.6362563191860312	0.4295640247778545	1	1.9563862928348907	Over	Q6P069	Sri
GO:0016052	carbohydrate catabolic process	P	0.6362563191860312	0.4295640247778545	1	1.9563862928348907	Over	Q91YP3	Dera
GO:0016504	peptidase activator activity	F	0.6362563191860312	0.4295640247778545	1	1.9563862928348907	Over	P49817	Cav1
GO:0021592	fourth ventricle development	P	0.6362563191860312	0.4295640247778545	1	1.9563862928348907	Over	Q8VDD5	Myh9
GO:0042289	MHC class II protein binding	F	0.6362563191860312	0.4295640247778545	1	1.9563862928348907	Over	P11087	Col1a1
GO:0032052	bile acid binding	F	0.6362563191860312	0.4295640247778545	1	1.9563862928348907	Over	Q9WUB3	Pygm
GO:0031115	negative regulation of microtubule polymerization	P	0.6362563191860312	0.4295640247778545	1	1.9563862928348907	Over	P99024	Tubb5
GO:0002523	leukocyte migration involved in inflammatory response	P	0.6362563191860312	0.4295640247778545	1	1.9563862928348907	Over	P31725	S100a9
GO:0001778	plasma membrane repair	P	0.6362563191860312	0.4295640247778545	1	1.9563862928348907	Over	P49817	Cav1
GO:0002253	activation of immune response	P	0.6362563191860312	0.4295640247778545	1	1.9563862928348907	Over	P01878	-
GO:0043034	costamere	C	0.6362563191860312	0.4295640247778545	1	1.9563862928348907	Over	P68134	Acta1
GO:0043086	negative regulation of catalytic activity	P	0.6362563191860312	0.4295640247778545	1	1.9563862928348907	Over	O70570	Pigr
GO:0002072	optic cup morphogenesis involved in camera-type eye development	P	0.6362563191860312	0.4295640247778545	1	1.9563862928348907	Over	Q8R0Y6	Aldh1l1
GO:0030220	platelet formation	P	0.6362563191860312	0.4295640247778545	1	1.9563862928348907	Over	Q8VDD5	Myh9
GO:0002060	purine nucleobase binding	F	0.6362563191860312	0.4295640247778545	1	1.9563862928348907	Over	Q9WUB3	Pygm
GO:0043297	apical junction assembly	P	0.6362563191860312	0.4295640247778545	1	1.9563862928348907	Over	P63001	Rac1
GO:0021678	third ventricle development	P	0.6362563191860312	0.4295640247778545	1	1.9563862928348907	Over	Q8VDD5	Myh9
GO:0001758	retinal dehydrogenase activity	F	0.6362563191860312	0.4295640247778545	1	1.9563862928348907	Over	Q8R0Y6	Aldh1l1
GO:0043296	apical junction complex	C	0.6362563191860312	0.4295640247778545	1	1.9563862928348907	Over	P63001	Rac1
GO:0001768	establishment of T cell polarity	P	0.6362563191860312	0.4295640247778545	1	1.9563862928348907	Over	Q8VDD5	Myh9
GO:0001892	embryonic placenta development	P	0.6362563191860312	0.4295640247778545	1	1.9563862928348907	Over	Q8K0D2	Habp2
GO:0001774	microglial cell activation	P	0.6362563191860312	0.4295640247778545	1	1.9563862928348907	Over	P98086	C1qa
GO:0001878	response to yeast	P	0.6362563191860312	0.4295640247778545	1	1.9563862928348907	Over	P48759	Ptx3
GO:0001650	fibrillar center	C	0.6362563191860312	0.4295640247778545	1	1.9563862928348907	Over	Q63836	Selenbp2
GO:0030950	establishment or maintenance of actin cytoskeleton polarity	P	0.6362563191860312	0.4295640247778545	1	1.9563862928348907	Over	P63001	Rac1
GO:0043462	regulation of ATPase activity	P	0.6362563191860312	0.4295640247778545	1	1.9563862928348907	Over	Q8VDD5	Myh9
GO:0005539	glycosaminoglycan binding	F	0.6362563191860312	0.4295640247778545	1	1.9563862928348907	Over	P28653	Bgn
GO:0000146	microfilament motor activity	F	0.6362563191860312	0.4295640247778545	1	1.9563862928348907	Over	Q8VDD5	Myh9
GO:0000212	meiotic spindle organization	P	0.6362563191860312	0.4295640247778545	1	1.9563862928348907	Over	Q8VDD5	Myh9
GO:0000226	microtubule cytoskeleton organization	P	0.6362563191860312	0.4295640247778545	1	1.9563862928348907	Over	P16858	Gapdh
GO:0004028	3-chloroallyl aldehyde dehydrogenase activity	F	0.6362563191860312	0.4295640247778545	1	1.9563862928348907	Over	Q8R0Y6	Aldh1l1
GO:0023052	signaling	P	0.6362563191860312	0.4295640247778545	1	1.9563862928348907	Over	Q9R098	Hgfac
GO:0004866	endopeptidase inhibitor activity	F	0.6362563191860312	0.4295640247778545	1	1.9563862928348907	Over	P01029	C4b
GO:0021768	nucleus accumbens development	P	0.6362563191860312	0.4295640247778545	1	1.9563862928348907	Over	Q8R0Y6	Aldh1l1
GO:0042613	MHC class II protein complex	C	0.6362563191860312	0.4295640247778545	1	1.9563862928348907	Over	P11087	Col1a1
GO:0004222	metalloendopeptidase activity	F	0.6362563191860312	0.4295640247778545	1	1.9563862928348907	Over	P29788	Vtn
GO:0004030	aldehyde dehydrogenase [NAD(P)+] activity	F	0.6362563191860312	0.4295640247778545	1	1.9563862928348907	Over	Q8R0Y6	Aldh1l1
GO:0030247	polysaccharide binding	F	0.6362563191860312	0.4295640247778545	1	1.9563862928348907	Over	P29788	Vtn
GO:0005789	endoplasmic reticulum membrane	C	0.6462542217909044	0.43672488096867856	6	1.304257528556594	Over	P49429,Q9JM62,P33267,Q8CIM7,P11714,P24456	Hpd,Reep6,Cyp2f2,Cyp2d26,Cyp2d9,Cyp2d10
GO:0001725	stress fiber	C	0.6490427896335152	0.4394345651364868	3	1.467289719626168	Over	P60710,P68134,Q8VDD5	Actb,Acta1,Myh9
GO:0071346	cellular response to interferon-gamma	P	0.6490427896335152	0.4394345651364868	3	1.467289719626168	Over	P63001,P16858,P68134	Rac1,Gapdh,Acta1
GO:0006958	complement activation, classical pathway	P	0.6591503433718858	0.4466969269131788	11	1.21812731440663	Over	P01029,Q8CG16,P98086,P01749,P01754,P01867,Q8CG14,P01864,P01868,P41317,Q91WP0	C4b,C1ra,C1qa,Ighv1-61,Ighv1-62-3,Igh-3,C1sa,-,Ighg1,Mbl2,Masp2
GO:0043197	dendritic spine	C	0.6647167630286739	0.4508917903061634	3	0.6288384512683578	Under	P63001,P23927,Q8VDD5	Rac1,Cryab,Myh9
GO:0002020	protease binding	F	0.7046059898523586	0.4798386888466464	7	1.244973095440385	Over	P0CG50,Q6P069,P11087,Q91Y97,P05064,P41317,P39876	Ubc,Sri,Col1a1,Aldob,Aldoa,Mbl2,Timp3
GO:0050731	positive regulation of peptidyl-tyrosine phosphorylation	P	0.7046059898523586	0.48331836473625245	1	0.4192256341789052	Under	P29788	Vtn
GO:0009791	post-embryonic development	P	0.7046059898523586	0.48331836473625245	1	0.4192256341789052	Under	Q91YI0	Asl
GO:0051241	negative regulation of multicellular organismal process	P	0.7046059898523586	0.48331836473625245	1	0.4192256341789052	Under	P98086	C1qa
GO:0051092	positive regulation of NF-kappaB transcription factor activity	P	0.7046059898523586	0.48331836473625245	1	0.4192256341789052	Under	P49817	Cav1
GO:0097458	neuron part	C	0.7046059898523586	0.48331836473625245	1	0.4192256341789052	Under	P04247	Mb
GO:0043531	ADP binding	F	0.7046059898523586	0.48670524979382246	1	0.39127725856697815	Under	Q8VDD5	Myh9
GO:0042288	MHC class I protein binding	F	0.7046059898523586	0.48670524979382246	1	0.39127725856697815	Under	P99024	Tubb5
GO:0042632	cholesterol homeostasis	P	0.7046059898523586	0.48670524979382246	1	0.39127725856697815	Under	P49817	Cav1
GO:0032879	regulation of localization	P	0.7046059898523586	0.48670524979382246	1	0.39127725856697815	Under	P33587	Proc
GO:0010977	negative regulation of neuron projection development	P	0.7046059898523586	0.48670524979382246	1	0.39127725856697815	Under	P63001	Rac1
GO:0010951	negative regulation of endopeptidase activity	P	0.7046059898523586	0.49197178488957793	4	0.6521287642782968	Under	Q91WP6,P01029,P16858,A6X935	Serpina3n,C4b,Gapdh,Itih4
GO:0043434	response to peptide hormone	P	0.7046059898523586	0.49572250749807706	4	1.4672897196261678	Over	Q91WP6,Q91Y97,O55143,P05064	Serpina3n,Aldob,Atp2a2,Aldoa
GO:0006953	acute-phase response	P	0.7046059898523586	0.49572250749807706	4	1.4672897196261678	Over	P05367,P05366,A6X935,Q61805	Saa2,Saa1,Itih4,Lbp
GO:0005903	brush border	C	0.7046059898523586	0.49572250749807706	4	1.4672897196261678	Over	Q60605,P47754,P09542,Q8VDD5	Myl6,Capza2,Myl3,Myh9
GO:0042127	regulation of cell population proliferation	P	0.7046059898523586	0.49572250749807706	4	1.4672897196261678	Over	P31725,P29788,Q8K0D2,Q9R098	S100a9,Vtn,Habp2,Hgfac
GO:0051050	positive regulation of transport	P	0.7046059898523586	0.5094438857176198	4	1.380978559648158	Over	O70570,P01029,P98086,P01878	Pigr,C4b,C1qa,-
GO:0042742	defense response to bacterium	P	0.7046059898523586	0.5203654234581141	5	0.7157510827444723	Under	P15702,P07743,P01749,P01754,P01878	Spn,Bpifa2,Ighv1-61,Ighv1-62-3,-
GO:0016324	apical plasma membrane	C	0.7046059898523586	0.5227016090123434	5	0.6987093902981754	Under	O70570,P47857,P49817,P04919,P01831	Pigr,Pfkm,Cav1,Slc4a1,Thy1
GO:0034097	response to cytokine	P	0.7046059898523586	0.526973499462386	4	1.3042575285565936	Over	P0CG50,Q91WP6,A6X935,P39876	Ubc,Serpina3n,Itih4,Timp3
GO:0001669	acrosomal vesicle	C	0.7046059898523586	0.526973499462386	4	1.3042575285565936	Over	P80317,P47754,P80318,P11983	Cct6a,Capza2,Cct3,Tcp1
GO:0051289	protein homotetramerization	P	0.7046059898523586	0.526973499462386	4	1.3042575285565936	Over	P47857,Q91Y97,P16858,P05064	Pfkm,Aldob,Gapdh,Aldoa
GO:0015671	oxygen transport	P	0.7046059898523586	0.5272226637356808	1	1.4672897196261678	Over	P04247	Mb
GO:0050870	positive regulation of T cell activation	P	0.7046059898523586	0.5272226637356808	1	1.4672897196261678	Over	P01831	Thy1
GO:0010765	positive regulation of sodium ion transport	P	0.7046059898523586	0.5272226637356808	1	1.4672897196261678	Over	Q9R098	Hgfac
GO:0021549	cerebellum development	P	0.7046059898523586	0.5272226637356808	1	1.4672897196261678	Over	Q9CWJ9	Atic
GO:0051683	establishment of Golgi localization	P	0.7046059898523586	0.5272226637356808	1	1.4672897196261678	Over	P63001	Rac1
GO:0051693	actin filament capping	P	0.7046059898523586	0.5272226637356808	1	1.4672897196261678	Over	Q8VDD5	Myh9
GO:0022627	cytosolic small ribosomal subunit	C	0.7046059898523586	0.5272226637356808	1	1.4672897196261678	Over	P0CG50	Ubc
GO:0051259	protein complex oligomerization	P	0.7046059898523586	0.5272226637356808	1	1.4672897196261678	Over	P04919	Slc4a1
GO:0030176	integral component of endoplasmic reticulum membrane	C	0.7046059898523586	0.5272226637356808	1	1.4672897196261678	Over	O88451	Rdh7
GO:0030212	hyaluronan metabolic process	P	0.7046059898523586	0.5272226637356808	1	1.4672897196261678	Over	A6X935	Itih4
GO:0019395	fatty acid oxidation	P	0.7046059898523586	0.5272226637356808	1	1.4672897196261678	Over	P98086	C1qa
GO:0030224	monocyte differentiation	P	0.7046059898523586	0.5272226637356808	1	1.4672897196261678	Over	Q8VDD5	Myh9
GO:0016197	endosomal transport	P	0.7046059898523586	0.5272226637356808	1	1.4672897196261678	Over	P63001	Rac1
GO:0051016	barbed-end actin filament capping	P	0.7046059898523586	0.5272226637356808	1	1.4672897196261678	Over	P47754	Capza2
GO:0014032	neural crest cell development	P	0.7046059898523586	0.5272226637356808	1	1.4672897196261678	Over	Q8R0Y6	Aldh1l1
GO:0021680	cerebellar Purkinje cell layer development	P	0.7046059898523586	0.5272226637356808	1	1.4672897196261678	Over	Q8VDD5	Myh9
GO:0006930	substrate-dependent cell migration, cell extension	P	0.7046059898523586	0.5272226637356808	1	1.4672897196261678	Over	Q8VDD5	Myh9
GO:0009314	response to radiation	P	0.7046059898523586	0.5272226637356808	1	1.4672897196261678	Over	P14602	Hspb1
GO:0005540	hyaluronic acid binding	F	0.7046059898523586	0.5272226637356808	1	1.4672897196261678	Over	A6X935	Itih4
GO:0005344	oxygen carrier activity	F	0.7046059898523586	0.5272226637356808	1	1.4672897196261678	Over	P04247	Mb
GO:0005212	structural constituent of eye lens	F	0.7046059898523586	0.5272226637356808	1	1.4672897196261678	Over	P23927	Cryab
GO:0003382	epithelial cell morphogenesis	P	0.7046059898523586	0.5272226637356808	1	1.4672897196261678	Over	P63001	Rac1
GO:0002891	positive regulation of immunoglobulin mediated immune response	P	0.7046059898523586	0.5272226637356808	1	1.4672897196261678	Over	P01878	-
GO:0002885	positive regulation of hypersensitivity	P	0.7046059898523586	0.5272226637356808	1	1.4672897196261678	Over	P01878	-
GO:1902600	proton transmembrane transport	P	0.7046059898523586	0.5272226637356808	1	1.4672897196261678	Over	O55143	Atp2a2
GO:1902669	positive regulation of axon guidance	P	0.7046059898523586	0.5272226637356808	1	1.4672897196261678	Over	P99024	Tubb5
GO:0005641	nuclear envelope lumen	C	0.7046059898523586	0.5272226637356808	1	1.4672897196261678	Over	P99024	Tubb5
GO:1903077	negative regulation of protein localization to plasma membrane	P	0.7046059898523586	0.5272226637356808	1	1.4672897196261678	Over	P63001	Rac1
GO:0002062	chondrocyte differentiation	P	0.7046059898523586	0.5272226637356808	1	1.4672897196261678	Over	P82198	Tgfbi
GO:0002027	regulation of heart rate	P	0.7046059898523586	0.5272226637356808	1	1.4672897196261678	Over	Q8VDD5	Myh9
GO:1903923	positive regulation of protein processing in phagocytic vesicle	P	0.7046059898523586	0.5272226637356808	1	1.4672897196261678	Over	Q8VDD5	Myh9
GO:0001947	heart looping	P	0.7046059898523586	0.5272226637356808	1	1.4672897196261678	Over	Q8R0Y6	Aldh1l1
GO:1990791	dorsal root ganglion development	P	0.7046059898523586	0.5272226637356808	1	1.4672897196261678	Over	P99024	Tubb5
GO:0001580	detection of chemical stimulus involved in sensory perception of bitter taste	P	0.7046059898523586	0.5272226637356808	1	1.4672897196261678	Over	O70570	Pigr
GO:2001223	negative regulation of neuron migration	P	0.7046059898523586	0.5272226637356808	1	1.4672897196261678	Over	P11087	Col1a1
GO:2001238	positive regulation of extrinsic apoptotic signaling pathway	P	0.7046059898523586	0.5272226637356808	1	1.4672897196261678	Over	P49817	Cav1
GO:0002080	acrosomal membrane	C	0.7046059898523586	0.5272226637356808	1	1.4672897196261678	Over	P49817	Cav1
GO:0099092	postsynaptic density, intracellular component	C	0.7046059898523586	0.5272226637356808	1	1.4672897196261678	Over	P16858	Gapdh
GO:0098982	GABA-ergic synapse	C	0.7046059898523586	0.5272226637356808	1	1.4672897196261678	Over	P41317	Mbl2
GO:0005777	peroxisome	C	0.7046059898523586	0.5272226637356808	1	1.4672897196261678	Over	Q8CAY6	Acat2
GO:0009116	nucleoside metabolic process	P	0.7046059898523586	0.5272226637356808	1	1.4672897196261678	Over	Q9CWJ9	Atic
GO:0007610	behavior	P	0.7046059898523586	0.5272226637356808	1	1.4672897196261678	Over	O55143	Atp2a2
GO:0007286	spermatid development	P	0.7046059898523586	0.5272226637356808	1	1.4672897196261678	Over	P47754	Capza2
GO:0007189	adenylate cyclase-activating G protein-coupled receptor signaling pathway	P	0.7046059898523586	0.5272226637356808	1	1.4672897196261678	Over	Q9Z126	Pf4
GO:0007173	epidermal growth factor receptor signaling pathway	P	0.7046059898523586	0.5272226637356808	1	1.4672897196261678	Over	O70570	Pigr
GO:0007163	establishment or maintenance of cell polarity	P	0.7046059898523586	0.5272226637356808	1	1.4672897196261678	Over	P40124	Cap1
GO:0007141	male meiosis I	P	0.7046059898523586	0.5272226637356808	1	1.4672897196261678	Over	P0CG50	Ubc
GO:0006996	organelle organization	P	0.7046059898523586	0.5272226637356808	1	1.4672897196261678	Over	Q9JM62	Reep6
GO:0006986	response to unfolded protein	P	0.7046059898523586	0.5272226637356808	1	1.4672897196261678	Over	P14602	Hspb1
GO:0006950	response to stress	P	0.7046059898523586	0.5272226637356808	1	1.4672897196261678	Over	P82198	Tgfbi
GO:0050852	T cell receptor signaling pathway	P	0.7046059898523586	0.5272226637356808	1	1.4672897196261678	Over	P15702	Spn
GO:0071480	cellular response to gamma radiation	P	0.7046059898523586	0.5272226637356808	1	1.4672897196261678	Over	P23927	Cryab
GO:0071782	endoplasmic reticulum tubular network	C	0.7046059898523586	0.5272226637356808	1	1.4672897196261678	Over	Q9JM62	Reep6
GO:0006641	triglyceride metabolic process	P	0.7046059898523586	0.5272226637356808	1	1.4672897196261678	Over	P49817	Cav1
GO:0006531	aspartate metabolic process	P	0.7046059898523586	0.5272226637356808	1	1.4672897196261678	Over	Q91YI0	Asl
GO:0090090	negative regulation of canonical Wnt signaling pathway	P	0.7046059898523586	0.5272226637356808	1	1.4672897196261678	Over	P49817	Cav1
GO:0006206	pyrimidine nucleobase metabolic process	P	0.7046059898523586	0.5272226637356808	1	1.4672897196261678	Over	Q9DCC4	Pycr3
GO:0006000	fructose metabolic process	P	0.7046059898523586	0.5272226637356808	1	1.4672897196261678	Over	P47857	Pfkm
GO:0097159	organic cyclic compound binding	F	0.7046059898523586	0.5272226637356808	1	1.4672897196261678	Over	O88451	Rdh7
GO:0060999	positive regulation of dendritic spine development	P	0.7046059898523586	0.5272226637356808	1	1.4672897196261678	Over	P63001	Rac1
GO:0030514	negative regulation of BMP signaling pathway	P	0.7046059898523586	0.5272226637356808	1	1.4672897196261678	Over	P49817	Cav1
GO:0000050	urea cycle	P	0.7046059898523586	0.5272226637356808	1	1.4672897196261678	Over	Q91YI0	Asl
GO:0042574	retinal metabolic process	P	0.7046059898523586	0.5272226637356808	1	1.4672897196261678	Over	Q8R0Y6	Aldh1l1
GO:0048012	hepatocyte growth factor receptor signaling pathway	P	0.7046059898523586	0.5272226637356808	1	1.4672897196261678	Over	P63001	Rac1
GO:0032420	stereocilium	C	0.7046059898523586	0.5272226637356808	1	1.4672897196261678	Over	P63001	Rac1
GO:0031016	pancreas development	P	0.7046059898523586	0.5272226637356808	1	1.4672897196261678	Over	Q8R0Y6	Aldh1l1
GO:0043235	receptor complex	C	0.7046059898523586	0.5272226637356808	1	1.4672897196261678	Over	O70570	Pigr
GO:0031673	H zone	C	0.7046059898523586	0.5272226637356808	1	1.4672897196261678	Over	O55143	Atp2a2
GO:0031640	killing of cells of other organism	P	0.7046059898523586	0.5272226637356808	1	1.4672897196261678	Over	P62889	Rpl30
GO:0032760	positive regulation of tumor necrosis factor production	P	0.7046059898523586	0.5272226637356808	1	1.4672897196261678	Over	Q9Z126	Pf4
GO:0048566	embryonic digestive tract development	P	0.7046059898523586	0.5272226637356808	1	1.4672897196261678	Over	Q8R0Y6	Aldh1l1
GO:0042472	inner ear morphogenesis	P	0.7046059898523586	0.5272226637356808	1	1.4672897196261678	Over	Q8R0Y6	Aldh1l1
GO:0031994	insulin-like growth factor I binding	F	0.7046059898523586	0.5272226637356808	1	1.4672897196261678	Over	P47878	Igfbp3
GO:0031448	positive regulation of fast-twitch skeletal muscle fiber contraction	P	0.7046059898523586	0.5272226637356808	1	1.4672897196261678	Over	O55143	Atp2a2
GO:0031398	positive regulation of protein ubiquitination	P	0.7046059898523586	0.5272226637356808	1	1.4672897196261678	Over	P49817	Cav1
GO:0033137	negative regulation of peptidyl-serine phosphorylation	P	0.7046059898523586	0.5272226637356808	1	1.4672897196261678	Over	P49817	Cav1
GO:0045428	regulation of nitric oxide biosynthetic process	P	0.7046059898523586	0.5272226637356808	1	1.4672897196261678	Over	P63001	Rac1
GO:0033630	positive regulation of cell adhesion mediated by integrin	P	0.7046059898523586	0.5272226637356808	1	1.4672897196261678	Over	P63001	Rac1
GO:0043931	ossification involved in bone maturation	P	0.7046059898523586	0.5272226637356808	1	1.4672897196261678	Over	P63001	Rac1
GO:0043124	negative regulation of I-kappaB kinase/NF-kappaB signaling	P	0.7046059898523586	0.5272226637356808	1	1.4672897196261678	Over	P63001	Rac1
GO:0043534	blood vessel endothelial cell migration	P	0.7046059898523586	0.5272226637356808	1	1.4672897196261678	Over	Q8VDD5	Myh9
GO:0033993	response to lipid	P	0.7046059898523586	0.5272226637356808	1	1.4672897196261678	Over	O88451	Rdh7
GO:0034116	positive regulation of heterotypic cell-cell adhesion	P	0.7046059898523586	0.5272226637356808	1	1.4672897196261678	Over	P01831	Thy1
GO:0034599	cellular response to oxidative stress	P	0.7046059898523586	0.5272226637356808	1	1.4672897196261678	Over	O55143	Atp2a2
GO:0031122	cytoplasmic microtubule organization	P	0.7046059898523586	0.5272226637356808	1	1.4672897196261678	Over	P49817	Cav1
GO:0031175	neuron projection development	P	0.7046059898523586	0.5272226637356808	1	1.4672897196261678	Over	P48759	Ptx3
GO:0042788	polysomal ribosome	C	0.7046059898523586	0.5272226637356808	1	1.4672897196261678	Over	P62889	Rpl30
GO:0048143	astrocyte activation	P	0.7046059898523586	0.5272226637356808	1	1.4672897196261678	Over	P98086	C1qa
GO:0006954	inflammatory response	P	0.736734663876319	0.5521997258170248	2	0.5869158878504672	Under	Q9Z126,P01029	Pf4,C4b
GO:0044444	cytoplasmic part	C	0.736734663876319	0.5521997258170248	2	0.5869158878504672	Under	Q91WP6,P01878	Serpina3n,-
GO:0070374	positive regulation of ERK1 and ERK2 cascade	P	0.7393304836819814	0.5546153660169981	2	0.5589675122385402	Under	P60710,P68134	Actb,Acta1
GO:0050766	positive regulation of phagocytosis	P	0.7456620205638375	0.5607871394323075	5	1.3338997451146983	Over	P48759,P01867,P01864,P01868,P41317	Ptx3,Igh-3,-,Ighg1,Mbl2
GO:0030426	growth cone	C	0.7456620205638375	0.5607871394323075	5	1.3338997451146983	Over	P63001,P99024,P68368,Q8VDD5,P01831	Rac1,Tubb5,Tuba4a,Myh9,Thy1
GO:0001666	response to hypoxia	P	0.7456620205638375	0.5607871394323075	5	1.3338997451146983	Over	P04247,P23927,P49817,P14602,Q9WUB3	Mb,Cryab,Cav1,Hspb1,Pygm
GO:0016020	membrane	C	0.7563158849000648	0.5702419831477921	5	1.275904104022755	Over	Q63836,P47754,Q61805,P98064,Q8BHN3	Selenbp2,Capza2,Lbp,Masp1,Ganab
GO:0005576	extracellular region	C	0.7563158849000648	0.5702419831477921	5	1.275904104022755	Over	P17742,P09528,P07743,P40124,P29391	Ppia,Fth1,Bpifa2,Cap1,Ftl1
GO:0031410	cytoplasmic vesicle	C	0.7563158849000648	0.5702419831477921	5	1.275904104022755	Over	P42932,O55143,P41317,Q8K0D2,P80313	Cct8,Atp2a2,Mbl2,Habp2,Cct7
GO:0005783	endoplasmic reticulum	C	0.7783449935905471	0.5873461585454415	8	0.7825545171339563	Under	P33587,P47963,P29788,P11087,P49817,Q91YI0,Q8K0D2,P01831	Proc,Rpl13,Vtn,Col1a1,Cav1,Asl,Habp2,Thy1
GO:0005524	ATP binding	F	0.7820431175633957	0.5906339629150121	12	1.154588631836985	Over	P80317,P80315,P47857,P42932,P60710,O55143,P68134,Q8VDD5,P80318,P80313,P11983,Q9WUB3	Cct6a,Cct4,Pfkm,Cct8,Actb,Atp2a2,Acta1,Myh9,Cct3,Cct7,Tcp1,Pygm
GO:0030027	lamellipodium	C	0.7899040868406003	0.5970730828057684	5	1.1738317757009347	Over	P99024,P68368,P60710,P68134,Q8VDD5	Tubb5,Tuba4a,Actb,Acta1,Myh9
GO:0008284	positive regulation of cell population proliferation	P	0.7935547813868458	0.6003370564846449	3	0.652128764278297	Under	P09528,Q8R0Y6,P29391	Fth1,Aldh1l1,Ftl1
GO:0019904	protein domain specific binding	F	0.8086129760554741	0.612242882696802	6	1.2143087334837253	Over	P99024,Q60605,P15702,P68368,P09542,Q8VDD5	Tubb5,Myl6,Spn,Tuba4a,Myl3,Myh9
GO:0019901	protein kinase binding	F	0.8202630674388856	0.6215852361011771	6	1.1738317757009344	Over	Q9EQK5,P68368,P60710,P49817,P68134,P01831	Mvp,Tuba4a,Actb,Cav1,Acta1,Thy1
GO:0007626	locomotory behavior	P	0.8206784858222442	0.62972595828827	2	1.4672897196261678	Over	Q8R0Y6,Q91YI0	Aldh1l1,Asl
GO:0042967	obsolete acyl-carrier-protein biosynthetic process	P	0.8206784858222442	0.62972595828827	2	1.4672897196261678	Over	Q8CAY6,Q8BMF4	Acat2,Dlat
GO:0060627	regulation of vesicle-mediated transport	P	0.8206784858222442	0.62972595828827	2	1.4672897196261678	Over	P01029,P01878	C4b,-
GO:0031901	early endosome membrane	C	0.8206784858222442	0.62972595828827	2	1.4672897196261678	Over	P63001,O88451	Rac1,Rdh7
GO:0014823	response to activity	P	0.8206784858222442	0.62972595828827	2	1.4672897196261678	Over	P04919,Q8VDD5	Slc4a1,Myh9
GO:0007005	mitochondrion organization	P	0.8206784858222442	0.62972595828827	2	1.4672897196261678	Over	P23927,P49817	Cryab,Cav1
GO:0031324	negative regulation of cellular metabolic process	P	0.8206784858222442	0.62972595828827	2	1.4672897196261678	Over	P33587,Q6P069	Proc,Sri
GO:0071902	positive regulation of protein serine/threonine kinase activity	P	0.8206784858222442	0.62972595828827	2	1.4672897196261678	Over	P63001,P98086	Rac1,C1qa
GO:0031210	phosphatidylcholine binding	F	0.8206784858222442	0.62972595828827	2	1.4672897196261678	Over	Q91Y97,P05064	Aldob,Aldoa
GO:0080134	regulation of response to stress	P	0.8206784858222442	0.62972595828827	2	1.4672897196261678	Over	P01029,P98086	C4b,C1qa
GO:0008289	lipid binding	F	0.8206784858222442	0.62972595828827	2	1.4672897196261678	Over	O70570,O88451	Pigr,Rdh7
GO:0010812	negative regulation of cell-substrate adhesion	P	0.8206784858222442	0.62972595828827	2	1.4672897196261678	Over	P63001,P11087	Rac1,Col1a1
GO:0043410	positive regulation of MAPK cascade	P	0.8206784858222442	0.62972595828827	2	1.4672897196261678	Over	P29788,P47878	Vtn,Igfbp3
GO:0031091	platelet alpha granule	C	0.8206784858222442	0.62972595828827	2	1.4672897196261678	Over	Q9Z126,P47878	Pf4,Igfbp3
GO:0030199	collagen fibril organization	P	0.8206784858222442	0.62972595828827	2	1.4672897196261678	Over	P11087,P41317	Col1a1,Mbl2
GO:0045202	synapse	C	0.8223031793046928	0.6320181460771606	4	0.7336448598130839	Under	P48759,P01029,P04919,Q9R098	Ptx3,C4b,Slc4a1,Hgfac
GO:0005178	integrin binding	F	0.8223031793046928	0.6320181460771606	4	0.7336448598130839	Under	P29788,P82198,Q8VDD5,P01831	Vtn,Tgfbi,Myh9,Thy1
GO:0019899	enzyme binding	F	0.8364440965858776	0.6434185358352905	7	1.1738317757009344	Over	Q60605,P33267,O55143,P04919,P16858,Q8K0D2,P09542	Myl6,Cyp2f2,Atp2a2,Slc4a1,Gapdh,Habp2,Myl3
GO:0032991	protein-containing complex	C	0.8427002965167933	0.6509480755961101	7	1.1412253374870196	Over	Q9Z126,P68368,Q6P069,Q91Y97,O35490,Q8R0Y6,P05064	Pf4,Tuba4a,Sri,Aldob,Bhmt,Aldh1l1,Aldoa
GO:0042572	retinol metabolic process	P	0.8427002965167933	0.6546597344841204	2	1.3042575285565936	Over	O88451,Q8R0Y6	Rdh7,Aldh1l1
GO:0042254	ribosome biogenesis	P	0.8427002965167933	0.6546597344841204	2	1.3042575285565936	Over	P47963,P62889	Rpl13,Rpl30
GO:0006357	regulation of transcription by RNA polymerase II	P	0.8427002965167933	0.6546597344841204	2	1.3042575285565936	Over	P33587,P0CG50	Proc,Ubc
GO:0071300	cellular response to retinoic acid	P	0.8427002965167933	0.6546597344841204	2	1.3042575285565936	Over	P11087,Q8R0Y6	Col1a1,Aldh1l1
GO:0005811	lipid droplet	C	0.8427002965167933	0.6546597344841204	2	1.3042575285565936	Over	P49817,P16858	Cav1,Gapdh
GO:0007409	axonogenesis	P	0.8427002965167933	0.6546597344841204	2	1.3042575285565936	Over	P60710,P68134	Actb,Acta1
GO:0030336	negative regulation of cell migration	P	0.8427002965167933	0.6546597344841204	2	1.3042575285565936	Over	P98086,P01831	C1qa,Thy1
GO:0030234	enzyme regulator activity	F	0.8427002965167933	0.6546597344841204	2	1.3042575285565936	Over	Q60605,P09542	Myl6,Myl3
GO:0043122	regulation of I-kappaB kinase/NF-kappaB signaling	P	0.8427002965167933	0.6546597344841204	2	1.3042575285565936	Over	P23927,P14602	Cryab,Hspb1
GO:0006525	arginine metabolic process	P	0.8427002965167933	0.6546597344841204	2	1.3042575285565936	Over	Q8R0Y6,Q9DCC4	Aldh1l1,Pycr3
GO:0001933	negative regulation of protein phosphorylation	P	0.8427002965167933	0.6546597344841204	2	1.3042575285565936	Over	P47878,P98086	Igfbp3,C1qa
GO:0003823	antigen binding	F	0.8525079078286211	0.662820833613734	8	1.1738317757009344	Over	P01631,P01749,P01754,P01867,P01864,P01868,P03976,P01629	-,Ighv1-61,Ighv1-62-3,Igh-3,-,Ighg1,-,-
GO:0098978	glutamatergic synapse	C	0.8721797083358385	0.6801354550949076	6	0.7825545171339564	Under	P63001,P60710,P16858,P68134,P41317,Q8VDD5	Rac1,Actb,Gapdh,Acta1,Mbl2,Myh9
GO:0031965	nuclear membrane	C	0.8721797083358385	0.6819968475861928	2	1.1738317757009344	Over	P17742,P16858	Ppia,Gapdh
GO:0005516	calmodulin binding	F	0.8721797083358385	0.6819968475861928	2	1.1738317757009344	Over	A2AN08,Q8VDD5	Ubr4,Myh9
GO:0060041	retina development in camera-type eye	P	0.8721797083358385	0.6819968475861928	2	1.1738317757009344	Over	P04919,Q8VDD5	Slc4a1,Myh9
GO:0044456	synapse part	C	0.8721797083358385	0.6819968475861928	2	1.1738317757009344	Over	O55143,Q8K0D2	Atp2a2,Habp2
GO:0043154	negative regulation of cysteine-type endopeptidase activity involved in apoptotic process	P	0.8721797083358385	0.6819968475861928	2	1.1738317757009344	Over	P23927,P14602	Cryab,Hspb1
GO:0071222	cellular response to lipopolysaccharide	P	0.8721797083358385	0.6819968475861928	2	1.1738317757009344	Over	Q9Z126,P63001	Pf4,Rac1
GO:0050729	positive regulation of inflammatory response	P	0.8846023310567945	0.7000067348588236	1	0.5335598980458792	Under	P31725	S100a9
GO:0006144	purine nucleobase metabolic process	P	0.8846023310567945	0.7000067348588236	1	0.5335598980458792	Under	Q9CWJ9	Atic
GO:0050728	negative regulation of inflammatory response	P	0.8846023310567945	0.7000067348588236	1	0.5335598980458792	Under	P33587	Proc
GO:1990830	cellular response to leukemia inhibitory factor	P	0.8846023310567945	0.7000067348588236	1	0.5335598980458792	Under	P47857	Pfkm
GO:0007568	aging	P	0.8846023310567945	0.7000067348588236	1	0.5335598980458792	Under	P98086	C1qa
GO:0031100	animal organ regeneration	P	0.8846023310567945	0.7000067348588236	1	0.5335598980458792	Under	Q9CWJ9	Atic
GO:0019003	GDP binding	F	0.8846023310567945	0.7000067348588236	1	0.5335598980458792	Under	P63001	Rac1
GO:0044459	plasma membrane part	C	0.8846023310567945	0.7012708880024302	1	0.4890965732087227	Under	P33587	Proc
GO:0030324	lung development	P	0.8846023310567945	0.7012708880024302	1	0.4890965732087227	Under	Q8R0Y6	Aldh1l1
GO:0001540	amyloid-beta binding	F	0.8846023310567945	0.7012708880024302	1	0.4890965732087227	Under	P23927	Cryab
GO:0032496	response to lipopolysaccharide	P	0.8846023310567945	0.7012708880024302	1	0.4890965732087227	Under	O55143	Atp2a2
GO:0042060	wound healing	P	0.8846023310567945	0.7012708880024302	1	0.4890965732087227	Under	P11087	Col1a1
GO:0043123	positive regulation of I-kappaB kinase/NF-kappaB signaling	P	0.8846023310567945	0.7012708880024302	1	0.4890965732087227	Under	P63001	Rac1
GO:0005911	cell-cell junction	C	0.8846023310567945	0.7012708880024302	1	0.4890965732087227	Under	P47754	Capza2
GO:0045893	positive regulation of transcription, DNA-templated	P	0.8846023310567945	0.7012708880024302	1	0.4890965732087227	Under	P11087	Col1a1
GO:0006897	endocytosis	P	0.8846023310567945	0.7012708880024302	1	0.4890965732087227	Under	P01878	-
GO:0019900	kinase binding	F	0.8846023310567945	0.7012708880024302	1	0.4890965732087227	Under	P47857	Pfkm
GO:0010595	positive regulation of endothelial cell migration	P	0.8877273488907563	0.7071343726383457	1	0.45147375988497485	Under	P23927	Cryab
GO:0098869	cellular oxidant detoxification	P	0.8877273488907563	0.7071343726383457	1	0.45147375988497485	Under	P31725	S100a9
GO:0032587	ruffle membrane	C	0.8877273488907563	0.7071343726383457	1	0.45147375988497485	Under	P63001	Rac1
GO:0016525	negative regulation of angiogenesis	P	0.8877273488907563	0.7071343726383457	1	0.45147375988497485	Under	Q9Z126	Pf4
GO:0005768	endosome	C	0.8877273488907563	0.7071343726383457	1	0.45147375988497485	Under	P49817	Cav1
GO:0007596	blood coagulation	P	0.8877273488907563	0.7071343726383457	1	0.45147375988497485	Under	P04919	Slc4a1
GO:0007507	heart development	P	0.8953961513593799	0.7166584580810295	3	1.2576769025367156	Over	P04247,Q6P069,P41317	Mb,Sri,Mbl2
GO:0030054	cell junction	C	0.8953961513593799	0.7166584580810295	3	1.2576769025367156	Over	P31725,P01029,P28653	S100a9,C4b,Bgn
GO:0050885	neuromuscular process controlling balance	P	0.8953961513593799	0.7166584580810295	3	1.2576769025367156	Over	P63001,Q8R0Y6,Q8VDD5	Rac1,Aldh1l1,Myh9
GO:0071260	cellular response to mechanical stimulus	P	0.8953961513593799	0.7166584580810295	3	1.2576769025367156	Over	P63001,P11087,P49817	Rac1,Col1a1,Cav1
GO:0019882	antigen processing and presentation	P	0.8953961513593799	0.7166584580810295	3	1.2576769025367156	Over	P01867,P01864,P01868	Igh-3,-,Ighg1
GO:0044425	membrane part	C	0.8953961513593799	0.7166584580810295	3	1.2576769025367156	Over	P01878,P41317,P28653	-,Mbl2,Bgn
GO:0008017	microtubule binding	F	0.9086207800830605	0.7289761121836125	3	1.1738317757009344	Over	P31725,P23927,P16858	S100a9,Cryab,Gapdh
GO:0045335	phagocytic vesicle	C	0.9086207800830605	0.7289761121836125	3	1.1738317757009344	Over	P63001,P60710,P68134	Rac1,Actb,Acta1
GO:0043204	perikaryon	C	0.9086207800830605	0.7289761121836125	3	1.1738317757009344	Over	P23927,Q91YI0,P14602	Cryab,Asl,Hspb1
GO:0005886	plasma membrane	C	0.9164920578295674	0.7360503577017947	13	1.0899866488651535	Over	P48759,P84750,Q9CWJ9,P60710,Q91Y97,P40124,P01878,P16858,P68134,P05064,P41317,A6X935,P80318	Ptx3,-,Atic,Actb,Aldob,Cap1,-,Gapdh,Acta1,Aldoa,Mbl2,Itih4,Cct3
GO:0005829	cytosol	C	0.9164920578295674	0.7364564279062767	38	1.0520190442602715	Over	Q63836,Q64514,P63001,P31725,P99024,O88451,P17742,Q60605,Q9EQK5,A2BIM8,A2AN08,P68368,Q9CWJ9,Q6P069,P60710,Q91Y97,P23927,P49817,O35490,P40124,Q8R0Y6,P01867,P16858,P68134,P05064,Q9Z2W0,P01864,P01868,P09542,Q9DCC4,P04939,Q5FW60,Q8VDD5,P98064,B5X0G2,P14602,P01831,P11589	Selenbp2,Tpp2,Rac1,S100a9,Tubb5,Rdh7,Ppia,Myl6,Mvp,Mup18,Ubr4,Tuba4a,Atic,Sri,Actb,Aldob,Cryab,Cav1,Bhmt,Cap1,Aldh1l1,Igh-3,Gapdh,Acta1,Aldoa,Dnpep,-,Ighg1,Myl3,Pycr3,Mup3,Mup20,Myh9,Masp1,Mup17,Hspb1,Thy1,Mup2
GO:0019897	extrinsic component of plasma membrane	C	0.924294378623932	0.7433136611311342	3	1.100467289719626	Over	P31725,Q8K0D2,Q9R098	S100a9,Habp2,Hgfac
GO:0030154	cell differentiation	P	0.9308020388280299	0.7504438372107679	2	0.690489279824079	Under	P01029,Q8K0D2	C4b,Habp2
GO:0016323	basolateral plasma membrane	C	0.9308020388280299	0.7504438372107679	2	0.690489279824079	Under	O70570,P04919	Pigr,Slc4a1
GO:0030496	midbody	C	0.9308020388280299	0.7515057783290515	2	0.6521287642782968	Under	P63001,Q8VDD5	Rac1,Myh9
GO:0008203	cholesterol metabolic process	P	0.9308020388280299	0.7515057783290515	2	0.6521287642782968	Under	P05367,P05366	Saa2,Saa1
GO:0048523	negative regulation of cellular process	P	0.9308020388280299	0.7515057783290515	2	0.6521287642782968	Under	P31725,P04247	S100a9,Mb
GO:0043065	positive regulation of apoptotic process	P	0.9346701736755384	0.7552230074644688	2	0.6178061977373339	Under	P17742,Q8R0Y6	Ppia,Aldh1l1
GO:0005634	nucleus	C	0.9380856059801723	0.7585790787074248	16	1.0793855408744226	Over	P47857,Q9EQK5,A2BIM8,P62889,P68368,Q91WP6,P49817,Q8R0Y6,Q91YP3,Q91YI0,P04939,Q5FW60,B5X0G2,P14602,Q8CAY6,P11589	Pfkm,Mvp,Mup18,Rpl30,Tuba4a,Serpina3n,Cav1,Aldh1l1,Dera,Asl,Mup3,Mup20,Mup17,Hspb1,Acat2,Mup2
GO:0051015	actin filament binding	F	0.9488087026994719	0.7690598194162916	4	1.1179350244770805	Over	Q60605,P47754,P09542,Q8VDD5	Myl6,Capza2,Myl3,Myh9
GO:0043066	negative regulation of apoptotic process	P	0.9488087026994719	0.7690598194162916	4	1.1179350244770805	Over	P33587,O70570,P60710,P68134	Proc,Pigr,Actb,Acta1
GO:0008022	protein C-terminus binding	F	0.9488087026994719	0.7690598194162916	4	1.1179350244770805	Over	P47857,P49817,O55143,P04919	Pfkm,Cav1,Atp2a2,Slc4a1
GO:0005604	basement membrane	C	0.959593073636533	0.7784111646282366	4	1.0671197960917584	Over	P15702,P11087,P82198,P39876	Spn,Col1a1,Tgfbi,Timp3
GO:0042383	sarcolemma	C	0.9624449522678539	0.781336429781341	3	0.765542462413653	Under	Q04857,O55143,P28653	Col6a1,Atp2a2,Bgn
GO:0042493	response to drug	P	0.9707541675627784	0.7893163256915408	5	1.1286843997124372	Over	P33587,P63001,O55143,P98086,Q8R0Y6	Proc,Rac1,Atp2a2,C1qa,Aldh1l1
GO:0008270	zinc ion binding	F	0.9769706041316171	0.7949919728470883	5	1.0868812737971618	Over	P31725,A2AN08,O35490,Q9Z2W0,P39876	S100a9,Ubr4,Bhmt,Dnpep,Timp3
GO:0005737	cytoplasm	C	1.0	0.8185064403952793	5	0.8384512683578104	Under	P48759,Q91YP3,A6X935,Q61805,Q91ZJ5	Ptx3,Dera,Itih4,Lbp,Ugp2
GO:0006910	phagocytosis, recognition	P	1.0	0.8185064403952793	5	0.8384512683578104	Under	P01749,P01754,P01867,P01864,P01868	Ighv1-61,Ighv1-62-3,Igh-3,-,Ighg1
GO:0005615	extracellular space	C	1.0	0.8240683539041199	36	0.9604078164825829	Under	Q9Z126,P33587,O70570,P48759,P31725,P15702,A2BIM8,P84750,P01631,P29788,Q91WP6,Q61646,P11087,Q04857,P82198,P01029,Q8CG16,P98086,P01878,P01671,Q8CG14,P41317,P01678,P01643,Q8K0D2,Q9R098,P03976,P04939,P01629,Q61805,Q91WP0,Q5FW60,P98064,B5X0G2,P39876,P11589	Pf4,Proc,Pigr,Ptx3,S100a9,Spn,Mup18,-,-,Vtn,Serpina3n,Hp,Col1a1,Col6a1,Tgfbi,C4b,C1ra,C1qa,-,-,C1sa,Mbl2,-,-,Habp2,Hgfac,-,Mup3,-,Lbp,Masp2,Mup20,Masp1,Mup17,Timp3,Mup2
GO:0002377	immunoglobulin production	P	1.0	0.8274947083849904	7	1.0534387730649413	Over	P84750,P01631,P01671,P01678,P01643,P03976,P01629	-,-,-,-,-,-,-
GO:0009617	response to bacterium	P	1.0	0.8308321274970356	6	0.8589012992933668	Under	P05367,P05366,P0CG50,Q91WP6,P49817,Q9WUB3	Saa2,Saa1,Ubc,Serpina3n,Cav1,Pygm
GO:0006911	phagocytosis, engulfment	P	1.0	0.8309674076829444	6	0.8803738317757008	Under	P01749,P01754,P01867,P01864,P01868,Q8VDD5	Ighv1-61,Ighv1-62-3,Igh-3,-,Ighg1,Myh9
GO:0019814	immunoglobulin complex	C	1.0	0.8475863771561734	9	1.0357339197361188	Over	O70570,P84750,P01631,P01878,P01671,P01678,P01643,P03976,P01629	Pigr,-,-,-,-,-,-,-,-
GO:0043025	neuronal cell body	C	1.0	0.8496496689669739	8	0.8695050190377293	Under	P63001,P31725,P99024,P68368,P01029,Q8K0D2,Q9R098,Q8VDD5	Rac1,S100a9,Tubb5,Tuba4a,C4b,Habp2,Hgfac,Myh9
GO:0045087	innate immune response	P	1.0	0.8527574047733651	10	1.0480640854472631	Over	P48759,P31725,P0CG50,P01029,P98086,P01749,P01754,P01867,P01864,P01868	Ptx3,S100a9,Ubc,C4b,C1qa,Ighv1-61,Ighv1-62-3,Igh-3,-,Ighg1
GO:0005654	nucleoplasm	C	1.0	0.8667548329785693	11	0.9222963951935913	Under	P80315,P31725,Q60605,A2AN08,P0CG50,P42932,Q6P069,P23927,O55143,P09542,P98064	Cct4,S100a9,Myl6,Ubr4,Ubc,Cct8,Sri,Cryab,Atp2a2,Myl3,Masp1
GO:0098609	cell-cell adhesion	P	1.0	1.0	1	0.9781931464174454	Under	Q8VDD5	Myh9
GO:0005794	Golgi apparatus	C	1.0	1.0	7	0.9781931464174454	Under	P33587,P80315,P23927,O55143,P80318,P11983,Q8BHN3	Proc,Cct4,Cryab,Atp2a2,Cct3,Tcp1,Ganab
GO:0097367	carbohydrate derivative binding	F	1.0	1.0	1	0.6521287642782968	Under	P41317	Mbl2
GO:0005791	rough endoplasmic reticulum	C	1.0	1.0	1	0.6521287642782968	Under	Q9R098	Hgfac
GO:0005856	cytoskeleton	C	1.0	1.0	1	0.6521287642782968	Under	Q9EQK5	Mvp
GO:0098590	plasma membrane region	C	1.0	1.0	1	1.1738317757009344	Over	O55143	Atp2a2
GO:0005793	endoplasmic reticulum-Golgi intermediate compartment	C	1.0	1.0	1	0.6521287642782968	Under	O55143	Atp2a2
GO:0043536	positive regulation of blood vessel endothelial cell migration	P	1.0	1.0	1	1.1738317757009344	Over	P14602	Hspb1
GO:0045429	positive regulation of nitric oxide biosynthetic process	P	1.0	1.0	1	0.6521287642782968	Under	P48759	Ptx3
GO:1903078	positive regulation of protein localization to plasma membrane	P	1.0	1.0	1	0.7336448598130839	Under	P63001	Rac1
GO:0000139	Golgi membrane	C	1.0	1.0	3	0.926709296606001	Under	P63001,P49429,P49817	Rac1,Hpd,Cav1
GO:0043679	axon terminus	C	1.0	1.0	1	0.8384512683578104	Under	Q6P069	Sri
GO:0097718	disordered domain specific binding	F	1.0	1.0	1	0.8384512683578104	Under	P16858	Gapdh
GO:0002376	immune system process	P	1.0	1.0	1	1.1738317757009344	Over	P07743	Bpifa2
GO:0000281	mitotic cytokinesis	P	1.0	1.0	1	0.9781931464174454	Under	Q8VDD5	Myh9
GO:0005802	trans-Golgi network	C	1.0	1.0	2	0.9029475197699497	Under	P63001,P82198	Rac1,Tgfbi
GO:0005844	polysome	C	1.0	1.0	1	0.9781931464174454	Under	Q8VDD5	Myh9
GO:0045453	bone resorption	P	1.0	1.0	1	0.9781931464174454	Under	P63001	Rac1
GO:0003779	actin binding	F	1.0	1.0	2	1.0671197960917584	Over	P04919,P40124	Slc4a1,Cap1
GO:0098685	Schaffer collateral - CA1 synapse	C	1.0	1.0	4	0.9781931464174454	Under	P63001,P99024,P60710,P68134	Rac1,Tubb5,Actb,Acta1
GO:0044424	intracellular part	C	1.0	1.0	1	1.1738317757009344	Over	Q91WP0	Masp2
GO:0006487	protein N-linked glycosylation	P	1.0	1.0	1	0.7336448598130839	Under	Q91WP6	Serpina3n
GO:0000082	G1/S transition of mitotic cell cycle	P	1.0	1.0	1	1.1738317757009344	Over	P63001	Rac1
GO:0006469	negative regulation of protein kinase activity	P	1.0	1.0	1	1.1738317757009344	Over	P23927	Cryab
GO:0006417	regulation of translation	P	1.0	1.0	1	0.9781931464174454	Under	P31725	S100a9
GO:0042246	tissue regeneration	P	1.0	1.0	1	1.1738317757009344	Over	Q8K0D2	Habp2
GO:1904996	positive regulation of leukocyte adhesion to vascular endothelial cell	P	1.0	1.0	1	1.1738317757009344	Over	P63001	Rac1
GO:0001917	photoreceptor inner segment	C	1.0	1.0	1	0.5869158878504672	Under	Q9JM62	Reep6
GO:0045665	negative regulation of neuron differentiation	P	1.0	1.0	1	1.1738317757009344	Over	P49817	Cav1
GO:0002102	podosome	C	1.0	1.0	1	0.8384512683578104	Under	P60710	Actb
GO:0042277	peptide binding	F	1.0	1.0	2	0.9781931464174454	Under	Q64514,P99024	Tpp2,Tubb5
GO:0006118	obsolete electron transport	P	1.0	1.0	1	0.6521287642782968	Under	P33267	Cyp2f2
GO:0000118	histone deacetylase complex	C	1.0	1.0	1	0.7336448598130839	Under	P63001	Rac1
GO:0090307	mitotic spindle assembly	P	1.0	1.0	1	0.9781931464174454	Under	P63001	Rac1
GO:0006015	5-phosphoribose 1-diphosphate biosynthetic process	P	1.0	1.0	1	1.1738317757009344	Over	Q9WUB3	Pygm
GO:0045596	negative regulation of cell differentiation	P	1.0	1.0	1	0.6521287642782968	Under	P98086	C1qa
GO:0045595	regulation of cell differentiation	P	1.0	1.0	2	1.0671197960917584	Over	P29788,Q6P069	Vtn,Sri
GO:0005938	cell cortex	C	1.0	1.0	2	0.9781931464174454	Under	P63001,P49817	Rac1,Cav1
GO:0002181	cytoplasmic translation	P	1.0	1.0	1	1.1738317757009344	Over	P62889	Rpl30
GO:0005930	axoneme	C	1.0	1.0	1	0.9781931464174454	Under	P99024	Tubb5
GO:0005925	focal adhesion	C	1.0	1.0	4	0.9390654205607476	Under	P60710,P49817,P68134,Q8VDD5	Actb,Cav1,Acta1,Myh9
GO:0005913	cell-cell adherens junction	C	1.0	1.0	1	0.7336448598130839	Under	Q8VDD5	Myh9
GO:0042470	melanosome	C	1.0	1.0	4	0.9390654205607476	Under	P80315,P63001,Q8VDD5,Q8BHN3	Cct4,Rac1,Myh9,Ganab
GO:0097060	synaptic membrane	C	1.0	1.0	1	0.7336448598130839	Under	P23927	Cryab
GO:0097110	scaffold protein binding	F	1.0	1.0	1	0.8384512683578104	Under	P49817	Cav1
GO:0005902	microvillus	C	1.0	1.0	1	0.5869158878504672	Under	P15702	Spn
GO:0045471	response to ethanol	P	1.0	1.0	2	0.9029475197699497	Under	P60710,P68134	Actb,Acta1
GO:0005887	integral component of plasma membrane	C	1.0	1.0	4	0.8384512683578104	Under	P15702,Q9JM62,P49817,P04919	Spn,Reep6,Cav1,Slc4a1
GO:0043547	positive regulation of GTPase activity	P	1.0	1.0	2	0.9781931464174454	Under	P17742,P01831	Ppia,Thy1
GO:0005884	actin filament	C	1.0	1.0	1	0.7336448598130839	Under	Q8VDD5	Myh9
GO:0002250	adaptive immune response	P	1.0	1.0	8	1.0207232832182038	Over	P84750,P01631,Q91WP6,P01671,P01678,P01643,P03976,P01629	-,-,Serpina3n,-,-,-,-,-
GO:0044877	protein-containing complex binding	F	1.0	1.0	7	1.0271028037383176	Over	P47857,P63001,P99024,P23927,P49817,O35490,Q8R0Y6	Pfkm,Rac1,Tubb5,Cryab,Cav1,Bhmt,Aldh1l1
GO:0000902	cell morphogenesis	P	1.0	1.0	1	0.7336448598130839	Under	P40124	Cap1
GO:0120163	negative regulation of cold-induced thermogenesis	P	1.0	1.0	1	0.5869158878504672	Under	Q8R0Y6	Aldh1l1
GO:0005525	GTP binding	F	1.0	1.0	3	0.926709296606001	Under	P63001,P99024,P68368	Rac1,Tubb5,Tuba4a
GO:0001726	ruffle	C	1.0	1.0	1	1.1738317757009344	Over	Q8VDD5	Myh9
GO:0003723	RNA binding	F	1.0	1.0	1	0.6521287642782968	Under	P0CG50	Ubc
GO:0045214	sarcomere organization	P	1.0	1.0	2	1.0671197960917584	Over	P68134,Q8VDD5	Acta1,Myh9
GO:1900026	positive regulation of substrate adhesion-dependent cell spreading	P	1.0	1.0	1	0.7336448598130839	Under	P63001	Rac1
GO:0044446	intracellular organelle part	C	1.0	1.0	1	0.8384512683578104	Under	Q8CAY6	Acat2
GO:0005200	structural constituent of cytoskeleton	F	1.0	1.0	2	0.9781931464174454	Under	P99024,P68368	Tubb5,Tuba4a
GO:0001974	blood vessel remodeling	P	1.0	1.0	1	0.9781931464174454	Under	P28653	Bgn
GO:0001968	fibronectin binding	F	1.0	1.0	1	0.9781931464174454	Under	P47878	Igfbp3
GO:0005080	protein kinase C binding	F	1.0	1.0	2	0.9029475197699497	Under	P23927,P14602	Cryab,Hspb1
GO:0003725	double-stranded RNA binding	F	1.0	1.0	2	0.7825545171339563	Under	P99024,P68368	Tubb5,Tuba4a
GO:0005044	scavenger receptor activity	F	1.0	1.0	1	0.9781931464174454	Under	P29788	Vtn
GO:0004888	transmembrane signaling receptor activity	F	1.0	1.0	1	0.6521287642782968	Under	P15702	Spn
GO:1901216	positive regulation of neuron death	P	1.0	1.0	1	1.1738317757009344	Over	P98086	C1qa
GO:1901224	positive regulation of NIK/NF-kappaB signaling	P	1.0	1.0	1	1.1738317757009344	Over	P63001	Rac1
GO:0004869	cysteine-type endopeptidase inhibitor activity	F	1.0	1.0	1	0.6521287642782968	Under	Q91WP6	Serpina3n
GO:0006511	ubiquitin-dependent protein catabolic process	P	1.0	1.0	1	1.1738317757009344	Over	A2AN08	Ubr4
GO:0044325	ion channel binding	F	1.0	1.0	1	0.5869158878504672	Under	P49817	Cav1
GO:1990904	ribonucleoprotein complex	C	1.0	1.0	1	0.8384512683578104	Under	P16858	Gapdh
GO:0003729	mRNA binding	F	1.0	1.0	1	0.9781931464174454	Under	P17742	Ppia
GO:1901700	response to oxygen-containing compound	P	1.0	1.0	2	0.8384512683578104	Under	P33587,P47878	Proc,Igfbp3
GO:1901701	cellular response to oxygen-containing compound	P	1.0	1.0	1	0.6521287642782968	Under	P98086	C1qa
GO:0045177	apical part of cell	C	1.0	1.0	2	0.7825545171339563	Under	P63001,Q9JM62	Rac1,Reep6
GO:0045121	membrane raft	C	1.0	1.0	6	0.926709296606001	Under	P63001,P99024,P68368,P60710,P68134,P01831	Rac1,Tubb5,Tuba4a,Actb,Acta1,Thy1
GO:0001764	neuron migration	P	1.0	1.0	3	0.9781931464174454	Under	P63001,P99024,Q8VDD5	Rac1,Tubb5,Myh9
GO:0003924	GTPase activity	F	1.0	1.0	3	0.9781931464174454	Under	P63001,P99024,P68368	Rac1,Tubb5,Tuba4a
GO:0120162	positive regulation of cold-induced thermogenesis	P	1.0	1.0	1	0.9781931464174454	Under	P49817	Cav1
GO:0098761	cellular response to interleukin-7	P	1.0	1.0	1	0.9781931464174454	Under	Q9CWJ9	Atic
GO:0120038	plasma membrane bounded cell projection part	C	1.0	1.0	1	0.9781931464174454	Under	Q8K0D2	Habp2
GO:0120025	plasma membrane bounded cell projection	C	1.0	1.0	1	0.8384512683578104	Under	P31725	S100a9
GO:0001889	liver development	P	1.0	1.0	2	0.9029475197699497	Under	P33587,Q91YI0	Proc,Asl
GO:0005788	endoplasmic reticulum lumen	C	1.0	1.0	2	0.9781931464174454	Under	O88451,Q8CFX1	Rdh7,H6pd
GO:0001530	lipopolysaccharide binding	F	1.0	1.0	2	0.9781931464174454	Under	P07743,Q61805	Bpifa2,Lbp
GO:1990403	embryonic brain development	P	1.0	1.0	1	1.1738317757009344	Over	P99024	Tubb5
GO:0001936	regulation of endothelial cell proliferation	P	1.0	1.0	1	1.1738317757009344	Over	Q8R0Y6	Aldh1l1
GO:0001772	immunological synapse	C	1.0	1.0	1	0.9781931464174454	Under	Q8VDD5	Myh9
GO:0005778	peroxisomal membrane	C	1.0	1.0	1	1.1738317757009344	Over	P49817	Cav1
GO:0043209	myelin sheath	C	1.0	1.0	3	0.9781931464174454	Under	P99024,Q60605,P09542	Tubb5,Myl6,Myl3
GO:0042832	defense response to protozoan	P	1.0	1.0	1	1.1738317757009344	Over	Q9Z126	Pf4
GO:0042826	histone deacetylase binding	F	1.0	1.0	1	0.7336448598130839	Under	P63001	Rac1
GO:0042803	protein homodimerization activity	F	1.0	1.0	14	0.9554444685937838	Under	P47857,O88451,Q9CWJ9,Q6P069,Q61646,P23927,O55143,P04919,P98086,P16858,Q8VDD5,P98064,P14602,Q9WUB3	Pfkm,Rdh7,Atic,Sri,Hp,Cryab,Atp2a2,Slc4a1,C1qa,Gapdh,Myh9,Masp1,Hspb1,Pygm
GO:0005741	mitochondrial outer membrane	C	1.0	1.0	1	0.7336448598130839	Under	Q91YI0	Asl
GO:0005730	nucleolus	C	1.0	1.0	3	0.800339847068819	Under	P47963,O88451,P17742	Rpl13,Rdh7,Ppia
GO:0001570	vasculogenesis	P	1.0	1.0	1	0.8384512683578104	Under	P49817	Cav1
GO:0003007	heart morphogenesis	P	1.0	1.0	1	0.7336448598130839	Under	P11087	Col1a1
GO:0003008	system process	P	1.0	1.0	1	1.1738317757009344	Over	O88451	Rdh7
GO:0001937	negative regulation of endothelial cell proliferation	P	1.0	1.0	1	0.8384512683578104	Under	P49817	Cav1
GO:0003279	cardiac septum development	P	1.0	1.0	1	0.9781931464174454	Under	Q8VDD5	Myh9
GO:0042571	immunoglobulin complex, circulating	C	1.0	1.0	5	0.9170560747663551	Under	P01749,P01754,P01867,P01864,P01868	Ighv1-61,Ighv1-62-3,Igh-3,-,Ighg1
GO:0005635	nuclear envelope	C	1.0	1.0	1	0.6521287642782968	Under	P63001	Rac1
GO:0001819	positive regulation of cytokine production	P	1.0	1.0	1	1.1738317757009344	Over	P29788	Vtn
GO:0043525	positive regulation of neuron apoptotic process	P	1.0	1.0	1	1.1738317757009344	Over	P63001	Rac1
GO:0044183	protein folding chaperone	F	1.0	1.0	1	0.9781931464174454	Under	P14602	Hspb1
GO:0001890	placenta development	P	1.0	1.0	1	0.9781931464174454	Under	O88451	Rdh7
GO:0001938	positive regulation of endothelial cell proliferation	P	1.0	1.0	1	0.6521287642782968	Under	P49817	Cav1
GO:0042573	retinoic acid metabolic process	P	1.0	1.0	1	0.9781931464174454	Under	P33267	Cyp2f2
GO:0005537	mannose binding	F	1.0	1.0	1	0.9781931464174454	Under	P41317	Mbl2
GO:0043393	regulation of protein binding	P	1.0	1.0	1	0.8384512683578104	Under	P63001	Rac1
GO:0001891	phagocytic cup	C	1.0	1.0	1	1.1738317757009344	Over	P63001	Rac1
GO:0030742	GTP-dependent protein binding	F	1.0	1.0	1	1.1738317757009344	Over	P63001	Rac1
GO:0045740	positive regulation of DNA replication	P	1.0	1.0	1	0.9781931464174454	Under	P63001	Rac1
GO:0016607	nuclear speck	C	1.0	1.0	1	0.7336448598130839	Under	P17742	Ppia
GO:0055038	recycling endosome membrane	C	1.0	1.0	2	0.9781931464174454	Under	O70570,P63001	Pigr,Rac1
GO:0017080	sodium channel regulator activity	F	1.0	1.0	1	0.9781931464174454	Under	P49817	Cav1
GO:0017137	Rab GTPase binding	F	1.0	1.0	1	0.8384512683578104	Under	P63001	Rac1
GO:0017148	negative regulation of translation	P	1.0	1.0	1	1.1738317757009344	Over	P16858	Gapdh
GO:0048598	embryonic morphogenesis	P	1.0	1.0	1	0.9781931464174454	Under	P11087	Col1a1
GO:0019725	cellular homeostasis	P	1.0	1.0	1	1.1738317757009344	Over	Q8K0D2	Habp2
GO:0051924	regulation of calcium ion transport	P	1.0	1.0	1	1.1738317757009344	Over	P63001	Rac1
GO:0031325	positive regulation of cellular metabolic process	P	1.0	1.0	1	1.1738317757009344	Over	P33587	Proc
GO:0051881	regulation of mitochondrial membrane potential	P	1.0	1.0	1	0.9781931464174454	Under	P0CG50	Ubc
GO:0051716	cellular response to stimulus	P	1.0	1.0	1	1.1738317757009344	Over	A2AN08	Ubr4
GO:0051704	multi-organism process	P	1.0	1.0	1	0.6521287642782968	Under	O70570	Pigr
GO:0048705	skeletal system morphogenesis	P	1.0	1.0	1	0.9781931464174454	Under	P29788	Vtn
GO:0019903	protein phosphatase binding	F	1.0	1.0	1	0.7336448598130839	Under	Q9EQK5	Mvp
GO:0019915	lipid storage	P	1.0	1.0	1	1.1738317757009344	Over	P49817	Cav1
GO:0031258	lamellipodium membrane	C	1.0	1.0	1	1.1738317757009344	Over	P63001	Rac1
GO:0048731	system development	P	1.0	1.0	2	0.9781931464174454	Under	P01029,Q9R098	C4b,Hgfac
GO:0031594	neuromuscular junction	C	1.0	1.0	2	0.9781931464174454	Under	P49817,Q8VDD5	Cav1,Myh9
GO:0051592	response to calcium ion	P	1.0	1.0	2	0.9781931464174454	Under	Q6P069,P49817	Sri,Cav1
GO:0016567	protein ubiquitination	P	1.0	1.0	1	0.9781931464174454	Under	A2AN08	Ubr4
GO:0060047	heart contraction	P	1.0	1.0	1	1.1738317757009344	Over	P63001	Rac1
GO:0010811	positive regulation of cell-substrate adhesion	P	1.0	1.0	1	0.9781931464174454	Under	P29788	Vtn
GO:0010906	regulation of glucose metabolic process	P	1.0	1.0	2	0.9781931464174454	Under	P47878,P98086	Igfbp3,C1qa
GO:0010976	positive regulation of neuron projection development	P	1.0	1.0	2	0.7336448598130839	Under	P31725,P14602	S100a9,Hspb1
GO:0048518	positive regulation of biological process	P	1.0	1.0	1	0.9781931464174454	Under	A2AN08	Ubr4
GO:0014002	astrocyte development	P	1.0	1.0	1	1.1738317757009344	Over	P31725	S100a9
GO:0048519	negative regulation of biological process	P	1.0	1.0	1	0.7336448598130839	Under	P24456	Cyp2d10
GO:0014069	postsynaptic density	C	1.0	1.0	4	0.8384512683578104	Under	P62889,P60710,P23927,P40124	Rpl30,Actb,Cryab,Cap1
GO:0014070	response to organic cyclic compound	P	1.0	1.0	2	0.7336448598130839	Under	P33587,P0CG50	Proc,Ubc
GO:0015031	protein transport	P	1.0	1.0	1	0.8384512683578104	Under	Q63836	Selenbp2
GO:0016021	integral component of membrane	C	1.0	1.0	5	0.863111599780099	Under	O70570,A2AN08,P01867,P01864,P01868	Pigr,Ubr4,Igh-3,-,Ighg1
GO:0016043	cellular component organization	P	1.0	1.0	1	0.9781931464174454	Under	Q8CAY6	Acat2
GO:0016192	vesicle-mediated transport	P	1.0	1.0	1	1.1738317757009344	Over	Q8K0D2	Habp2
GO:0016322	neuron remodeling	P	1.0	1.0	1	1.1738317757009344	Over	P98086	C1qa
GO:0031647	regulation of protein stability	P	1.0	1.0	1	0.9781931464174454	Under	A2AN08	Ubr4
GO:0016459	myosin complex	C	1.0	1.0	1	0.9781931464174454	Under	P63001	Rac1
GO:0016485	protein processing	P	1.0	1.0	1	0.8384512683578104	Under	Q9R098	Hgfac
GO:0060013	righting reflex	P	1.0	1.0	1	0.6521287642782968	Under	Q8R0Y6	Aldh1l1
GO:0021670	lateral ventricle development	P	1.0	1.0	1	1.1738317757009344	Over	Q8VDD5	Myh9
GO:0031224	intrinsic component of membrane	C	1.0	1.0	1	1.1738317757009344	Over	Q9R098	Hgfac
GO:0051496	positive regulation of stress fiber assembly	P	1.0	1.0	1	1.1738317757009344	Over	P63001	Rac1
GO:0050919	negative chemotaxis	P	1.0	1.0	1	1.1738317757009344	Over	P63001	Rac1
GO:0030317	flagellated sperm motility	P	1.0	1.0	1	0.8384512683578104	Under	P16858	Gapdh
GO:0030335	positive regulation of cell migration	P	1.0	1.0	3	0.8384512683578104	Under	Q91Y97,P49817,P05064	Aldob,Cav1,Aldoa
GO:0050908	detection of light stimulus involved in visual perception	P	1.0	1.0	1	0.9781931464174454	Under	Q9JM62	Reep6
GO:0030424	axon	C	1.0	1.0	5	0.9466385287910762	Under	P23927,P01029,P04919,Q8K0D2,Q9WUB3	Cryab,C4b,Slc4a1,Habp2,Pygm
GO:0030425	dendrite	C	1.0	1.0	6	1.0061415220293723	Over	P99024,P68368,P01029,P04919,P14602,P01831	Tubb5,Tuba4a,C4b,Slc4a1,Hspb1,Thy1
GO:0050871	positive regulation of B cell activation	P	1.0	1.0	5	0.9466385287910762	Under	P01749,P01754,P01867,P01864,P01868	Ighv1-61,Ighv1-62-3,Igh-3,-,Ighg1
GO:0030902	hindbrain development	P	1.0	1.0	1	1.1738317757009344	Over	Q8R0Y6	Aldh1l1
GO:0050853	B cell receptor signaling pathway	P	1.0	1.0	5	0.9170560747663551	Under	P01749,P01754,P01867,P01864,P01868	Ighv1-61,Ighv1-62-3,Igh-3,-,Ighg1
GO:0030866	cortical actin cytoskeleton organization	P	1.0	1.0	1	0.5869158878504672	Under	P63001	Rac1
GO:0030506	ankyrin binding	F	1.0	1.0	1	0.9781931464174454	Under	P04919	Slc4a1
GO:0030864	cortical actin cytoskeleton	C	1.0	1.0	1	0.8384512683578104	Under	P40124	Cap1
GO:0050830	defense response to Gram-positive bacterium	P	1.0	1.0	2	0.8384512683578104	Under	P41317,Q61805	Mbl2,Lbp
GO:0050829	defense response to Gram-negative bacterium	P	1.0	1.0	2	0.9781931464174454	Under	P62889,Q61805	Rpl30,Lbp
GO:0030673	axolemma	C	1.0	1.0	1	1.1738317757009344	Over	P01831	Thy1
GO:0050807	regulation of synapse organization	P	1.0	1.0	2	1.0671197960917584	Over	P99024,P68368	Tubb5,Tuba4a
GO:0030674	protein binding, bridging	F	1.0	1.0	1	0.5869158878504672	Under	P49817	Cav1
GO:0030308	negative regulation of cell growth	P	1.0	1.0	1	0.5869158878504672	Under	P23927	Cryab
GO:0030307	positive regulation of cell growth	P	1.0	1.0	2	0.9781931464174454	Under	P63001,P23927	Rac1,Cryab
GO:0051017	actin filament bundle assembly	P	1.0	1.0	1	0.9781931464174454	Under	Q8VDD5	Myh9
GO:0030239	myofibril assembly	P	1.0	1.0	1	1.1738317757009344	Over	Q6P069	Sri
GO:0051491	positive regulation of filopodium assembly	P	1.0	1.0	1	0.9781931464174454	Under	P63001	Rac1
GO:0048812	neuron projection morphogenesis	P	1.0	1.0	1	0.6521287642782968	Under	P0CG50	Ubc
GO:0023051	regulation of signaling	P	1.0	1.0	1	0.9781931464174454	Under	Q8K0D2	Habp2
GO:0048821	erythrocyte development	P	1.0	1.0	1	1.1738317757009344	Over	P04919	Slc4a1
GO:0030017	sarcomere	C	1.0	1.0	1	0.8384512683578104	Under	P39876	Timp3
GO:0048839	inner ear development	P	1.0	1.0	1	0.6521287642782968	Under	P98086	C1qa
GO:0051287	NAD binding	F	1.0	1.0	1	1.1738317757009344	Over	P16858	Gapdh
GO:0030141	secretory granule	C	1.0	1.0	3	0.8384512683578104	Under	P63001,P11087,P07743	Rac1,Col1a1,Bpifa2
GO:0032024	positive regulation of insulin secretion	P	1.0	1.0	1	1.1738317757009344	Over	P47857	Pfkm
GO:0051258	protein polymerization	P	1.0	1.0	1	0.9781931464174454	Under	P29788	Vtn
GO:0030168	platelet activation	P	1.0	1.0	1	0.8384512683578104	Under	Q9Z126	Pf4
GO:0030170	pyridoxal phosphate binding	F	1.0	1.0	1	1.1738317757009344	Over	Q9WUB3	Pygm
GO:0051146	striated muscle cell differentiation	P	1.0	1.0	1	1.1738317757009344	Over	P47878	Igfbp3
GO:0051130	positive regulation of cellular component organization	P	1.0	1.0	1	0.6521287642782968	Under	P28653	Bgn
GO:0030193	regulation of blood coagulation	P	1.0	1.0	1	0.9781931464174454	Under	P49817	Cav1
GO:0030194	positive regulation of blood coagulation	P	1.0	1.0	1	0.6521287642782968	Under	P31725	S100a9
GO:0031069	hair follicle morphogenesis	P	1.0	1.0	1	0.9781931464174454	Under	P47878	Igfbp3
GO:0050715	positive regulation of cytokine secretion	P	1.0	1.0	1	1.1738317757009344	Over	P16858	Gapdh
GO:0048873	homeostasis of number of cells within a tissue	P	1.0	1.0	1	1.1738317757009344	Over	P63001	Rac1
GO:0006522	alanine metabolic process	P	1.0	1.0	1	1.1738317757009344	Over	Q91YI0	Asl
GO:0010744	positive regulation of macrophage derived foam cell differentiation	P	1.0	1.0	1	0.9781931464174454	Under	Q9Z126	Pf4
GO:0048286	lung alveolus development	P	1.0	1.0	1	0.8384512683578104	Under	P47878	Igfbp3
GO:0006915	apoptotic process	P	1.0	1.0	1	0.7336448598130839	Under	Q91WP6	Serpina3n
GO:0034663	endoplasmic reticulum chaperone complex	C	1.0	1.0	1	0.7336448598130839	Under	P17742	Ppia
GO:0006919	activation of cysteine-type endopeptidase activity involved in apoptotic process	P	1.0	1.0	2	0.7825545171339563	Under	P31725,Q6P069	S100a9,Sri
GO:0034605	cellular response to heat	P	1.0	1.0	1	0.7336448598130839	Under	O55143	Atp2a2
GO:0071417	cellular response to organonitrogen compound	P	1.0	1.0	1	0.9781931464174454	Under	P98086	C1qa
GO:0071364	cellular response to epidermal growth factor stimulus	P	1.0	1.0	1	0.8384512683578104	Under	P11087	Col1a1
GO:0034364	high-density lipoprotein particle	C	1.0	1.0	2	0.9781931464174454	Under	P05367,P05366	Saa2,Saa1
GO:0071353	cellular response to interleukin-4	P	1.0	1.0	1	0.7336448598130839	Under	P68368	Tuba4a
GO:0046326	positive regulation of glucose import	P	1.0	1.0	1	0.9781931464174454	Under	P63001	Rac1
GO:0046330	positive regulation of JNK cascade	P	1.0	1.0	1	1.1738317757009344	Over	P63001	Rac1
GO:0050793	regulation of developmental process	P	1.0	1.0	1	0.8384512683578104	Under	P01029	C4b
GO:0046486	glycerolipid metabolic process	P	1.0	1.0	1	1.1738317757009344	Over	Q8R0Y6	Aldh1l1
GO:0007030	Golgi organization	P	1.0	1.0	1	0.9781931464174454	Under	P63001	Rac1
GO:0007088	regulation of mitotic nuclear division	P	1.0	1.0	1	1.1738317757009344	Over	P63001	Rac1
GO:0007154	cell communication	P	1.0	1.0	1	1.1738317757009344	Over	Q9R098	Hgfac
GO:0007155	cell adhesion	P	1.0	1.0	2	1.0671197960917584	Over	Q04857,P82198	Col6a1,Tgfbi
GO:0046597	negative regulation of viral entry into host cell	P	1.0	1.0	1	1.1738317757009344	Over	P48759	Ptx3
GO:0006914	autophagy	P	1.0	1.0	1	0.7336448598130839	Under	P31725	S100a9
GO:0033344	cholesterol efflux	P	1.0	1.0	1	0.9781931464174454	Under	P49817	Cav1
GO:0071526	semaphorin-plexin signaling pathway	P	1.0	1.0	1	0.7336448598130839	Under	P63001	Rac1
GO:0006909	phagocytosis	P	1.0	1.0	1	0.8384512683578104	Under	P01878	-
GO:0042026	protein refolding	P	1.0	1.0	1	1.1738317757009344	Over	P17742	Ppia
GO:0036064	ciliary basal body	C	1.0	1.0	1	0.7336448598130839	Under	P68368	Tuba4a
GO:0006560	proline metabolic process	P	1.0	1.0	2	1.0671197960917584	Over	Q8R0Y6,Q91YI0	Aldh1l1,Asl
GO:0072659	protein localization to plasma membrane	P	1.0	1.0	2	0.7825545171339563	Under	P49817,P04919	Cav1,Slc4a1
GO:0035904	aorta development	P	1.0	1.0	1	0.9781931464174454	Under	Q8VDD5	Myh9
GO:0006570	tyrosine metabolic process	P	1.0	1.0	1	0.7336448598130839	Under	Q8R0Y6	Aldh1l1
GO:0006631	fatty acid metabolic process	P	1.0	1.0	1	1.1738317757009344	Over	Q8R0Y6	Aldh1l1
GO:0006633	fatty acid biosynthetic process	P	1.0	1.0	1	0.9781931464174454	Under	Q8CAY6	Acat2
GO:0045907	positive regulation of vasoconstriction	P	1.0	1.0	1	1.1738317757009344	Over	P49817	Cav1
GO:0071944	cell periphery	C	1.0	1.0	1	0.8384512683578104	Under	P68368	Tuba4a
GO:0035115	embryonic forelimb morphogenesis	P	1.0	1.0	1	0.9781931464174454	Under	Q8R0Y6	Aldh1l1
GO:0006730	one-carbon metabolic process	P	1.0	1.0	1	1.1738317757009344	Over	Q8R0Y6	Aldh1l1
GO:0034987	immunoglobulin receptor binding	F	1.0	1.0	6	1.0357339197361186	Over	P01749,P01754,P01867,P01878,P01864,P01868	Ighv1-61,Ighv1-62-3,Igh-3,-,-,Ighg1
GO:0006749	glutathione metabolic process	P	1.0	1.0	1	0.8384512683578104	Under	Q8CFX1	H6pd
GO:0071711	basement membrane organization	P	1.0	1.0	1	1.1738317757009344	Over	P49817	Cav1
GO:0006874	cellular calcium ion homeostasis	P	1.0	1.0	1	0.8384512683578104	Under	Q9WUB3	Pygm
GO:0006898	receptor-mediated endocytosis	P	1.0	1.0	1	0.7336448598130839	Under	P40124	Cap1
GO:0071560	cellular response to transforming growth factor beta stimulus	P	1.0	1.0	1	1.1738317757009344	Over	P11087	Col1a1
GO:0007186	G protein-coupled receptor signaling pathway	P	1.0	1.0	1	1.1738317757009344	Over	P63001	Rac1
GO:0033138	positive regulation of peptidyl-serine phosphorylation	P	1.0	1.0	1	0.7336448598130839	Under	P49817	Cav1
GO:0007204	positive regulation of cytosolic calcium ion concentration	P	1.0	1.0	1	0.8384512683578104	Under	Q9Z126	Pf4
GO:0008637	apoptotic mitochondrial changes	P	1.0	1.0	1	1.1738317757009344	Over	O55143	Atp2a2
GO:0047485	protein N-terminus binding	F	1.0	1.0	2	0.7336448598130839	Under	Q60605,P09542	Myl6,Myl3
GO:0009628	response to abiotic stimulus	P	1.0	1.0	1	1.1738317757009344	Over	Q6P069	Sri
GO:0009636	response to toxic substance	P	1.0	1.0	1	0.9781931464174454	Under	P33267	Cyp2f2
GO:0009749	response to glucose	P	1.0	1.0	1	0.7336448598130839	Under	P47857	Pfkm
GO:0009888	tissue development	P	1.0	1.0	1	0.7336448598130839	Under	O55143	Atp2a2
GO:0009898	cytoplasmic side of plasma membrane	C	1.0	1.0	1	0.7336448598130839	Under	P04919	Slc4a1
GO:0009925	basal plasma membrane	C	1.0	1.0	1	0.7336448598130839	Under	P49817	Cav1
GO:0009954	proximal/distal pattern formation	P	1.0	1.0	1	1.1738317757009344	Over	Q8R0Y6	Aldh1l1
GO:0009968	negative regulation of signal transduction	P	1.0	1.0	1	0.7336448598130839	Under	O70570	Pigr
GO:0010035	response to inorganic substance	P	1.0	1.0	1	1.1738317757009344	Over	Q9CWJ9	Atic
GO:0032355	response to estradiol	P	1.0	1.0	2	0.9781931464174454	Under	P11087,P23927	Col1a1,Cryab
GO:0032101	regulation of response to external stimulus	P	1.0	1.0	1	0.8384512683578104	Under	P01029	C4b
GO:0010592	positive regulation of lamellipodium assembly	P	1.0	1.0	1	0.9781931464174454	Under	P63001	Rac1
GO:0060976	coronary vasculature development	P	1.0	1.0	1	0.8384512683578104	Under	Q8VDD5	Myh9
GO:0032092	positive regulation of protein binding	P	1.0	1.0	1	0.8384512683578104	Under	P49817	Cav1
GO:0010646	regulation of cell communication	P	1.0	1.0	1	0.9781931464174454	Under	Q8K0D2	Habp2
GO:0008430	selenium binding	F	1.0	1.0	1	0.8384512683578104	Under	Q63836	Selenbp2
GO:0008305	integrin complex	C	1.0	1.0	4	0.8384512683578104	Under	P29788,P82198,Q8VDD5,P01831	Vtn,Tgfbi,Myh9,Thy1
GO:0062023	collagen-containing extracellular matrix	C	1.0	1.0	3	0.8803738317757008	Under	P29788,Q04857,P28653	Vtn,Col6a1,Bgn
GO:0008233	peptidase activity	F	1.0	1.0	1	0.6521287642782968	Under	Q6P069	Sri
GO:0007219	Notch signaling pathway	P	1.0	1.0	1	0.6521287642782968	Under	P39876	Timp3
GO:0007229	integrin-mediated signaling pathway	P	1.0	1.0	2	0.9781931464174454	Under	P63001,P01831	Rac1,Thy1
GO:0007275	multicellular organism development	P	1.0	1.0	1	0.9781931464174454	Under	P16858	Gapdh
GO:0007411	axon guidance	P	1.0	1.0	2	0.8384512683578104	Under	P68368,Q8VDD5	Tuba4a,Myh9
GO:0007420	brain development	P	1.0	1.0	1	0.7336448598130839	Under	P04919	Slc4a1
GO:0046777	protein autophosphorylation	P	1.0	1.0	1	0.9781931464174454	Under	P01831	Thy1
GO:0007565	female pregnancy	P	1.0	1.0	1	0.8384512683578104	Under	P47878	Igfbp3
GO:0070324	thyroid hormone binding	F	1.0	1.0	1	0.9781931464174454	Under	Q8R0Y6	Aldh1l1
GO:0010718	positive regulation of epithelial to mesenchymal transition	P	1.0	1.0	1	1.1738317757009344	Over	P11087	Col1a1
GO:0007595	lactation	P	1.0	1.0	1	0.8384512683578104	Under	P49817	Cav1
GO:0032880	regulation of protein localization	P	1.0	1.0	1	0.9781931464174454	Under	P29788	Vtn
GO:0032794	GTPase activating protein binding	F	1.0	1.0	1	0.9781931464174454	Under	P99024	Tubb5
GO:0007613	memory	P	1.0	1.0	1	0.8384512683578104	Under	P31725	S100a9
GO:0008045	motor neuron axon guidance	P	1.0	1.0	1	0.9781931464174454	Under	P63001	Rac1
GO:0008092	cytoskeletal protein binding	F	1.0	1.0	2	1.0671197960917584	Over	Q91Y97,P05064	Aldob,Aldoa
GO:0008180	COP9 signalosome	C	1.0	1.0	1	0.9781931464174454	Under	Q8VDD5	Myh9
GO:0008201	heparin binding	F	1.0	1.0	4	0.9781931464174454	Under	Q9Z126,P05367,P05366,P29788	Pf4,Saa2,Saa1,Vtn
GO:0065008	regulation of biological quality	P	1.0	1.0	4	0.9781931464174454	Under	Q8CFX1,Q8CAY6,Q8BHN3,P28653	H6pd,Acat2,Ganab,Bgn
GO:0070301	cellular response to hydrogen peroxide	P	1.0	1.0	1	0.5869158878504672	Under	P17742	Ppia
GO:0043627	response to estrogen	P	1.0	1.0	1	0.9781931464174454	Under	P49817	Cav1

## Sheet: Table S4
KEGG enrichment analysis result Note: The significance level of the enrichment of differential proteins and proteins with or without presence in various pathways of the KEGG database was calculated using Fisher's Exact Test. 'Over' indicates that the proportion of differential proteins is greater than that of background proteins in the database. A P-value < 0.05 indicates significant enrichment.
Map ID	Map Name	#Diff	P_Value	FDR	RichFactor	Over/Under	DiffSeqs	DiffGenes
ko00030	Pentose phosphate pathway	5	0.0020792621437582845	0.3784257101640077	4.192256341789053	Over	P47857 P05064 Q91YP3 Q91Y97 Q8CFX1	Pfkm,Aldoa,Dera,Aldob,H6pd
ko05016	Huntington disease	2	0.00604594015648003	0.5501805542396827	0.22573687994248742	Under	P99024 P68368	Tubb5,Tuba4a
ko05017	Spinocerebellar ataxia	1	0.018672160597116433	0.6058705316914526	0.17262231995601976	Under	O55143	Atp2a2
ko05205	Proteoglycans in cancer	6	0.02860179324443446	0.6058705316914526	2.347663551401869	Over	P63001 P39876 P49817 P60710 P11087 P29788	Rac1,Timp3,Cav1,Actb,Col1a1,Vtn
ko04620	Toll-like receptor signaling pathway	2	0.028804640437222428	0.6058705316914526	5.869158878504671	Over	P63001 Q61805	Rac1,Lbp
ko04370	VEGF signaling pathway	2	0.028804640437222428	0.6058705316914526	5.869158878504671	Over	P63001 P14602	Rac1,Hspb1
ko01200	Carbon metabolism	7	0.029209798971239147	0.6058705316914526	2.1623216920806687	Over	P16858 Q8BMF4 Q8CAY6 P47857 P05064 Q91Y97 Q8CFX1	Gapdh,Dlat,Acat2,Pfkm,Aldoa,Aldob,H6pd
ko05012	Parkinson disease	3	0.030511773626416272	0.6058705316914526	0.3452446399120396	Under	P99024 P0CG50 P68368	Tubb5,Ubc,Tuba4a
ko01110	Biosynthesis of secondary metabolites	13	0.03489137350023358	0.6058705316914526	1.734069668649108	Over	Q9CWJ9 P16858 Q8BMF4 Q8CAY6 Q91ZJ5 Q9WUB3 P47857 Q9DCC4 P05064 Q91YI0 Q91Y97 O35490 Q8CFX1	Atic,Gapdh,Dlat,Acat2,Ugp2,Pygm,Pfkm,Pycr3,Aldoa,Asl,Aldob,Bhmt,H6pd
ko00140	Steroid hormone biosynthesis	3	0.03705141819714071	0.6058705316914526	3.5214953271028033	Over	Q8CIM7 P11714 P24456	Cyp2d26,Cyp2d9,Cyp2d10
ko00051	Fructose and mannose metabolism	3	0.03705141819714071	0.6058705316914526	3.5214953271028033	Over	P47857 P05064 Q91Y97	Pfkm,Aldoa,Aldob
ko05014	Amyotrophic lateral sclerosis	4	0.039947507584051814	0.6058705316914526	0.4192256341789052	Under	P99024 P63001 P60710 P68368	Tubb5,Rac1,Actb,Tuba4a
ko05169	Epstein-Barr virus infection	3	0.06269610913396577	0.7383227176215512	0.3912772585669782	Under	P63001 P01749 P01754	Rac1,Ighv1-61,Ighv1-62-3
ko04726	Serotonergic synapse	3	0.06501116249686771	0.7383227176215512	2.934579439252336	Over	Q8CIM7 P11714 P24456	Cyp2d26,Cyp2d9,Cyp2d10
ko00680	Methane metabolism	3	0.06501116249686771	0.7383227176215512	2.934579439252336	Over	P47857 P05064 Q91Y97	Pfkm,Aldoa,Aldob
ko05020	Prion disease	5	0.06983032894881464	0.7383227176215512	0.48909657320872274	Under	P99024 P63001 P49817 P98086 P68368	Tubb5,Rac1,Cav1,C1qa,Tuba4a
ko04217	Necroptosis	4	0.0730690038921706	0.7383227176215512	2.347663551401869	Over	P17742 Q9WUB3 P29391 P09528	Ppia,Pygm,Ftl1,Fth1
ko00052	Galactose metabolism	2	0.0767510227624079	0.7383227176215512	3.9127725856697815	Over	Q91ZJ5 P47857	Ugp2,Pfkm
ko05010	Alzheimer disease	4	0.0806081741635177	0.7383227176215512	0.45147375988497485	Under	P16858 P99024 O55143 P68368	Gapdh,Tubb5,Atp2a2,Tuba4a
ko05022	Pathways of neurodegeneration - multiple diseases	5	0.09601087383289969	0.7383227176215512	0.514838498114445	Under	P99024 P63001 P0CG50 O55143 P68368	Tubb5,Rac1,Ubc,Atp2a2,Tuba4a
ko04640	Hematopoietic cell lineage	2	0.0973453305931031	0.7383227176215512	0.35570659869725285	Under	P01749 P01754	Ighv1-61,Ighv1-62-3
ko04919	Thyroid hormone signaling pathway	3	0.09993836719286145	0.7383227176215512	2.515353805073431	Over	P47857 O55143 P60710	Pfkm,Atp2a2,Actb
ko00710	Carbon fixation in photosynthetic organisms	3	0.09993836719286145	0.7383227176215512	2.515353805073431	Over	P16858 P05064 Q91Y97	Gapdh,Aldoa,Aldob
ko01230	Biosynthesis of amino acids	6	0.10145769666077444	0.7383227176215512	1.9563862928348907	Over	P16858 P47857 Q9DCC4 P05064 Q91YI0 Q91Y97	Gapdh,Pfkm,Pycr3,Aldoa,Asl,Aldob
ko04270	Vascular smooth muscle contraction	2	0.13658810790416123	0.7383227176215512	2.9345794392523357	Over	Q8VDD5 Q60605	Myh9,Myl6
ko04210	Apoptosis	2	0.13658810790416123	0.7383227176215512	2.9345794392523357	Over	P60710 P68368	Actb,Tuba4a
ko00670	One carbon pool by folate	2	0.13658810790416123	0.7383227176215512	2.9345794392523357	Over	Q9CWJ9 Q8R0Y6	Atic,Aldh1l1
ko04530	Tight junction	5	0.1529397443181796	0.7383227176215512	1.956386292834891	Over	P63001 Q8VDD5 P60710 Q60605 P68368	Rac1,Myh9,Actb,Myl6,Tuba4a
ko00010	Glycolysis / Gluconeogenesis	5	0.1676122269871253	0.7383227176215512	1.8341121495327102	Over	P16858 Q8BMF4 P47857 P05064 Q91Y97	Gapdh,Dlat,Pfkm,Aldoa,Aldob
ko00643	Styrene degradation	1	0.17038216560497338	0.7383227176215512	5.869158878504671	Over	O09173	Hgd
ko00650	Butanoate metabolism	1	0.17038216560497338	0.7383227176215512	5.869158878504671	Over	Q8CAY6	Acat2
ko04745	Phototransduction - fly	1	0.17038216560497338	0.7383227176215512	5.869158878504671	Over	P60710	Actb
ko00362	Benzoate degradation	1	0.17038216560497338	0.7383227176215512	5.869158878504671	Over	Q8CAY6	Acat2
ko04120	Ubiquitin mediated proteolysis	1	0.17038216560497338	0.7383227176215512	5.869158878504671	Over	P0CG50	Ubc
ko04137	Mitophagy - animal	1	0.17038216560497338	0.7383227176215512	5.869158878504671	Over	P0CG50	Ubc
ko01503	Cationic antimicrobial peptide (CAMP) resistance	1	0.17038216560497338	0.7383227176215512	5.869158878504671	Over	P17742	Ppia
ko00541	O-Antigen nucleotide sugar biosynthesis	1	0.17038216560497338	0.7383227176215512	5.869158878504671	Over	Q91ZJ5	Ugp2
ko01250	Biosynthesis of nucleotide sugars	1	0.17038216560497338	0.7383227176215512	5.869158878504671	Over	Q91ZJ5	Ugp2
ko00130	Ubiquinone and other terpenoid-quinone biosynthesis	1	0.17038216560497338	0.7383227176215512	5.869158878504671	Over	P49429	Hpd
ko00040	Pentose and glucuronate interconversions	1	0.17038216560497338	0.7383227176215512	5.869158878504671	Over	Q91ZJ5	Ugp2
ko00900	Terpenoid backbone biosynthesis	1	0.17038216560497338	0.7383227176215512	5.869158878504671	Over	Q8CAY6	Acat2
ko00920	Sulfur metabolism	1	0.17038216560497338	0.7383227176215512	5.869158878504671	Over	Q63836	Selenbp2
ko01120	Microbial metabolism in diverse environments	7	0.1981912878365356	0.7709929261384579	1.5216337833160263	Over	P16858 Q8BMF4 Q8CAY6 P47857 P05064 Q91Y97 O09173	Gapdh,Dlat,Acat2,Pfkm,Aldoa,Aldob,Hgd
ko05140	Leishmaniasis	2	0.20148040949991114	0.7709929261384579	0.4192256341789052	Under	P01749 P01754	Ighv1-61,Ighv1-62-3
ko04072	Phospholipase D signaling pathway	2	0.20148040949991114	0.7709929261384579	0.4192256341789052	Under	P01749 P01754	Ighv1-61,Ighv1-62-3
ko04921	Oxytocin signaling pathway	2	0.20294590104235447	0.7709929261384579	2.347663551401869	Over	P60710 Q60605	Actb,Myl6
ko00500	Starch and sucrose metabolism	2	0.20294590104235447	0.7709929261384579	2.347663551401869	Over	Q91ZJ5 Q9WUB3	Ugp2,Pygm
ko05143	African trypanosomiasis	2	0.20333879370684604	0.7709929261384579	0.4047695778279084	Under	P01749 P01754	Ighv1-61,Ighv1-62-3
ko05200	Pathways in cancer	1	0.22358254694529606	0.7949742069821983	0.30890309886866696	Under	P63001	Rac1
ko04066	HIF-1 signaling pathway	4	0.2516371090957553	0.7949742069821983	1.8058950395398994	Over	P16858 P47857 P05064 Q91Y97	Gapdh,Pfkm,Aldoa,Aldob
ko00350	Tyrosine metabolism	2	0.2719132703149764	0.7949742069821983	1.9563862928348907	Over	O09173 P49429	Hgd,Hpd
ko05167	Kaposi sarcoma-associated herpesvirus infection	2	0.2719132703149764	0.7949742069821983	1.9563862928348907	Over	P63001 P0CG50	Rac1,Ubc
ko04978	Mineral absorption	2	0.2719132703149764	0.7949742069821983	1.9563862928348907	Over	P29391 P09528	Ftl1,Fth1
ko04613	Neutrophil extracellular trap formation	4	0.2801749700194756	0.7949742069821983	0.5869158878504672	Under	P63001 P01749 P01754 P60710	Rac1,Ighv1-61,Ighv1-62-3,Actb
ko05320	Autoimmune thyroid disease	2	0.28569740346577593	0.7949742069821983	0.4695327102803738	Under	P01749 P01754	Ighv1-61,Ighv1-62-3
ko05330	Allograft rejection	2	0.28569740346577593	0.7949742069821983	0.4695327102803738	Under	P01749 P01754	Ighv1-61,Ighv1-62-3
ko05323	Rheumatoid arthritis	2	0.2911230035295871	0.7949742069821983	0.4347525095188646	Under	P01749 P01754	Ighv1-61,Ighv1-62-3
ko04391	Hippo signaling pathway - fly	1	0.3119596907729313	0.7949742069821983	2.9345794392523357	Over	P60710	Actb
ko04061	Viral protein interaction with cytokine and cytokine receptor	1	0.3119596907729313	0.7949742069821983	2.9345794392523357	Over	Q9Z126	Pf4
ko04115	p53 signaling pathway	1	0.3119596907729313	0.7949742069821983	2.9345794392523357	Over	P47878	Igfbp3
ko04361	Axon regeneration	1	0.3119596907729313	0.7949742069821983	2.9345794392523357	Over	P63001	Rac1
ko00720	Carbon fixation pathways in prokaryotes	1	0.3119596907729313	0.7949742069821983	2.9345794392523357	Over	Q8CAY6	Acat2
ko00360	Phenylalanine metabolism	1	0.3119596907729313	0.7949742069821983	2.9345794392523357	Over	P49429	Hpd
ko02026	Biofilm formation - Escherichia coli	1	0.3119596907729313	0.7949742069821983	2.9345794392523357	Over	Q9WUB3	Pygm
ko01523	Antifolate resistance	1	0.3119596907729313	0.7949742069821983	2.9345794392523357	Over	Q9CWJ9	Atic
ko00510	N-Glycan biosynthesis	1	0.3119596907729313	0.7949742069821983	2.9345794392523357	Over	Q8BHN3	Ganab
ko01212	Fatty acid metabolism	1	0.3119596907729313	0.7949742069821983	2.9345794392523357	Over	Q8CAY6	Acat2
ko05110	Vibrio cholerae infection	1	0.3119596907729313	0.7949742069821983	2.9345794392523357	Over	P60710	Actb
ko05152	Tuberculosis	3	0.3339763839722566	0.7949742069821983	0.5679831172746457	Under	P01749 P01754 Q61805	Ighv1-61,Ighv1-62-3,Lbp
ko04062	Chemokine signaling pathway	2	0.3407032315637993	0.7949742069821983	1.6769025367156207	Over	P63001 Q9Z126	Rac1,Pf4
ko04261	Adrenergic signaling in cardiomyocytes	2	0.3407032315637993	0.7949742069821983	1.6769025367156207	Over	P09542 O55143	Myl3,Atp2a2
ko04260	Cardiac muscle contraction	2	0.3407032315637993	0.7949742069821983	1.6769025367156207	Over	P09542 O55143	Myl3,Atp2a2
ko04520	Adherens junction	2	0.3407032315637993	0.7949742069821983	1.6769025367156207	Over	P63001 P60710	Rac1,Actb
ko04216	Ferroptosis	2	0.3407032315637993	0.7949742069821983	1.6769025367156207	Over	P29391 P09528	Ftl1,Fth1
ko04933	AGE-RAGE signaling pathway in diabetic complications	2	0.3407032315637993	0.7949742069821983	1.6769025367156207	Over	P63001 P11087	Rac1,Col1a1
ko04024	cAMP signaling pathway	2	0.3407032315637993	0.7949742069821983	1.6769025367156207	Over	P63001 O55143	Rac1,Atp2a2
ko04922	Glucagon signaling pathway	2	0.3407032315637993	0.7949742069821983	1.6769025367156207	Over	Q9WUB3 P47857	Pygm,Pfkm
ko04540	Gap junction	2	0.3407032315637993	0.7949742069821983	1.6769025367156207	Over	P99024 P68368	Tubb5,Tuba4a
ko05132	Salmonella infection	5	0.36116349480350884	0.8143817969746825	1.467289719626168	Over	P16858 P99024 P63001 P60710 P68368	Gapdh,Tubb5,Rac1,Actb,Tuba4a
ko05146	Amoebiasis	4	0.37285266707194165	0.8143817969746825	0.6345036625410456	Under	P01749 P01754 P14602 P11087	Ighv1-61,Ighv1-62-3,Hspb1,Col1a1
ko01100	Metabolic pathways	20	0.37961815948623645	0.8143817969746825	1.1977875262254436	Over	Q9CWJ9 P16858 O88451 Q8BMF4 Q63836 Q8CAY6 Q91ZJ5 Q9WUB3 P47857 Q9DCC4 Q8BHN3 P05064 Q91YI0 Q91YP3 Q8R0Y6 Q91Y97 O35490 Q8CFX1 O09173 P49429	Atic,Gapdh,Rdh7,Dlat,Selenbp2,Acat2,Ugp2,Pygm,Pfkm,Pycr3,Ganab,Aldoa,Asl,Dera,Aldh1l1,Aldob,Bhmt,H6pd,Hgd,Hpd
ko05340	Primary immunodeficiency	2	0.40009303407553193	0.8143817969746825	0.5103616416091019	Under	P01749 P01754	Ighv1-61,Ighv1-62-3
ko05310	Asthma	2	0.40009303407553193	0.8143817969746825	0.5103616416091019	Under	P01749 P01754	Ighv1-61,Ighv1-62-3
ko03010	Ribosome	3	0.4102019202322945	0.8143817969746825	1.600679694137638	Over	P47963 P61358 P62889	Rpl13,Rpl27,Rpl30
ko05410	Hypertrophic cardiomyopathy	3	0.4102019202322945	0.8143817969746825	1.600679694137638	Over	P09542 O55143 P60710	Myl3,Atp2a2,Actb
ko04510	Focal adhesion	6	0.42254803881738834	0.8143817969746825	1.3544212796549246	Over	P63001 P49817 P60710 Q04857 P11087 P29788	Rac1,Cav1,Actb,Col6a1,Col1a1,Vtn
ko04371	Apelin signaling pathway	1	0.4295640247778545	0.8143817969746825	1.9563862928348907	Over	P09542	Myl3
ko05231	Choline metabolism in cancer	1	0.4295640247778545	0.8143817969746825	1.9563862928348907	Over	P63001	Rac1
ko05212	Pancreatic cancer	1	0.4295640247778545	0.8143817969746825	1.9563862928348907	Over	P63001	Rac1
ko00520	Amino sugar and nucleotide sugar metabolism	1	0.4295640247778545	0.8143817969746825	1.9563862928348907	Over	Q91ZJ5	Ugp2
ko05120	Epithelial cell signaling in Helicobacter pylori infection	1	0.4295640247778545	0.8143817969746825	1.9563862928348907	Over	P63001	Rac1
ko02020	Two-component system	1	0.4295640247778545	0.8143817969746825	1.9563862928348907	Over	Q8CAY6	Acat2
ko04966	Collecting duct acid secretion	1	0.4295640247778545	0.8143817969746825	1.9563862928348907	Over	P04919	Slc4a1
ko04657	IL-17 signaling pathway	1	0.4295640247778545	0.8143817969746825	1.9563862928348907	Over	P31725	S100a9
ko03018	RNA degradation	1	0.4295640247778545	0.8143817969746825	1.9563862928348907	Over	P47857	Pfkm
ko04310	Wnt signaling pathway	1	0.4295640247778545	0.8143817969746825	1.9563862928348907	Over	P63001	Rac1
ko05418	Fluid shear stress and atherosclerosis	3	0.4394345651364868	0.8160927638249041	1.467289719626168	Over	P63001 P49817 P60710	Rac1,Cav1,Actb
ko05100	Bacterial invasion of epithelial cells	3	0.4394345651364868	0.8160927638249041	1.467289719626168	Over	P63001 P49817 P60710	Rac1,Cav1,Actb
ko04020	Calcium signaling pathway	3	0.4508917903061634	0.8201241435888368	0.6288384512683578	Under	P01749 O55143 P01754	Ighv1-61,Atp2a2,Ighv1-62-3
ko04666	Fc gamma R-mediated phagocytosis	3	0.4535772800551605	0.8201241435888368	0.5869158878504672	Under	P63001 P01749 P01754	Rac1,Ighv1-61,Ighv1-62-3
ko05133	Pertussis	4	0.5094438857176198	0.8201241435888368	1.380978559648158	Over	P01029 Q8CG14 Q8CG16 P98086	C4b,C1sa,C1ra,C1qa
ko04935	Growth hormone synthesis, secretion and action	1	0.5272226637356808	0.8201241435888368	1.4672897196261678	Over	P47878	Igfbp3
ko00260	Glycine, serine and threonine metabolism	1	0.5272226637356808	0.8201241435888368	1.4672897196261678	Over	O35490	Bhmt
ko04380	Osteoclast differentiation	1	0.5272226637356808	0.8201241435888368	1.4672897196261678	Over	P63001	Rac1
ko04390	Hippo signaling pathway	1	0.5272226637356808	0.8201241435888368	1.4672897196261678	Over	P60710	Actb
ko05211	Renal cell carcinoma	1	0.5272226637356808	0.8201241435888368	1.4672897196261678	Over	P63001	Rac1
ko04931	Insulin resistance	1	0.5272226637356808	0.8201241435888368	1.4672897196261678	Over	Q9WUB3	Pygm
ko05210	Colorectal cancer	1	0.5272226637356808	0.8201241435888368	1.4672897196261678	Over	P63001	Rac1
ko04213	Longevity regulating pathway - multiple species	1	0.5272226637356808	0.8201241435888368	1.4672897196261678	Over	P23927	Cryab
ko00280	Valine, leucine and isoleucine degradation	1	0.5272226637356808	0.8201241435888368	1.4672897196261678	Over	Q8CAY6	Acat2
ko05164	Influenza A	1	0.5272226637356808	0.8201241435888368	1.4672897196261678	Over	P60710	Actb
ko04013	MAPK signaling pathway - fly	1	0.5272226637356808	0.8201241435888368	1.4672897196261678	Over	P63001	Rac1
ko04910	Insulin signaling pathway	1	0.5272226637356808	0.8201241435888368	1.4672897196261678	Over	Q9WUB3	Pygm
ko04971	Gastric acid secretion	1	0.5272226637356808	0.8201241435888368	1.4672897196261678	Over	P60710	Actb
ko04071	Sphingolipid signaling pathway	1	0.5272226637356808	0.8201241435888368	1.4672897196261678	Over	P63001	Rac1
ko00071	Fatty acid degradation	1	0.5272226637356808	0.8201241435888368	1.4672897196261678	Over	Q8CAY6	Acat2
ko00020	Citrate cycle (TCA cycle)	1	0.5272226637356808	0.8201241435888368	1.4672897196261678	Over	Q8BMF4	Dlat
ko05150	Staphylococcus aureus infection	9	0.5415709330101266	0.8343358199835341	1.1738317757009347	Over	P41317 P98064 P01749 P01029 Q8CG14 Q8CG16 P98086 P01754 Q91WP0	Mbl2,Masp1,Ighv1-61,C4b,C1sa,C1ra,C1qa,Ighv1-62-3,Masp2
ko04151	PI3K-Akt signaling pathway	6	0.5455272669123108	0.8343358199835341	0.765542462413653	Under	P63001 P01749 P01754 Q04857 P11087 P29788	Rac1,Ighv1-61,Ighv1-62-3,Col6a1,Col1a1,Vtn
ko04611	Platelet activation	2	0.5521997258170248	0.8375029174891543	0.5869158878504672	Under	P60710 P11087	Actb,Col1a1
ko05202	Transcriptional misregulation in cancer	3	0.5983526432986407	0.8965367878119072	0.6772106398274623	Under	P01749 P47878 P01754	Ighv1-61,Igfbp3,Ighv1-62-3
ko05171	Coronavirus disease - COVID-19	12	0.6009752094123773	0.8965367878119072	1.1179350244770805	Over	P47963 P61358 P62889 P41317 P98064 P01749 P01029 Q8CG14 Q8CG16 P98086 P01754 Q91WP0	Rpl13,Rpl27,Rpl30,Mbl2,Masp1,Ighv1-61,C4b,C1sa,C1ra,C1qa,Ighv1-62-3,Masp2
ko05412	Arrhythmogenic right ventricular cardiomyopathy	2	0.62972595828827	0.9284337523422428	1.4672897196261678	Over	O55143 P60710	Atp2a2,Actb
ko05135	Yersinia infection	4	0.632559259837572	0.9284337523422428	0.7573108230328609	Under	P63001 P01749 P01754 P60710	Rac1,Ighv1-61,Ighv1-62-3,Actb
ko00620	Pyruvate metabolism	2	0.6546597344841204	0.938173792725275	1.3042575285565936	Over	Q8BMF4 Q8CAY6	Dlat,Acat2
ko01240	Biosynthesis of cofactors	2	0.6546597344841204	0.938173792725275	1.3042575285565936	Over	Q91ZJ5 P49429	Ugp2,Hpd
ko04974	Protein digestion and absorption	2	0.6546597344841204	0.938173792725275	1.3042575285565936	Over	Q04857 P11087	Col6a1,Col1a1
ko05130	Pathogenic Escherichia coli infection	8	0.662820833613734	0.942448372794528	1.1738317757009344	Over	P16858 P99024 P63001 Q8VDD5 P01749 P01754 P60710 P68368	Gapdh,Tubb5,Rac1,Myh9,Ighv1-61,Ighv1-62-3,Actb,Tuba4a
ko04141	Protein processing in endoplasmic reticulum	2	0.6819968475861928	0.962197102796024	1.1738317757009344	Over	Q8BHN3 P23927	Ganab,Cryab
ko04714	Thermogenesis	1	0.7000067348588236	0.9725284407962282	0.5335598980458792	Under	P60710	Actb
ko05163	Human cytomegalovirus infection	1	0.7000067348588236	0.9725284407962282	0.5335598980458792	Under	P63001	Rac1
ko04670	Leukocyte transendothelial migration	3	0.7166584580810295	0.9806905215845667	1.2576769025367156	Over	P01831 P63001 P60710	Thy1,Rac1,Actb
ko04936	Alcoholic liver disease	3	0.7166584580810295	0.9806905215845667	1.2576769025367156	Over	P01029 P98086 Q61805	C4b,C1qa,Lbp
ko05131	Shigellosis	3	0.7433136611311342	1.0	1.100467289719626	Over	P63001 P0CG50 P60710	Rac1,Ubc,Actb
ko05208	Chemical carcinogenesis - reactive oxygen species	2	0.7515057783290515	1.0	0.6521287642782968	Under	P63001 P33267	Rac1,Cyp2f2
ko05415	Diabetic cardiomyopathy	4	0.7612047112327476	1.0	1.1738317757009344	Over	P16858 P63001 O55143 P11087	Gapdh,Rac1,Atp2a2,Col1a1
ko05165	Human papillomavirus infection	4	0.7690598194162916	1.0	1.1179350244770805	Over	A2AN08 Q04857 P11087 P29788	Ubr4,Col6a1,Col1a1,Vtn
ko04664	Fc epsilon RI signaling pathway	3	0.7822761409925356	1.0	0.733644859813084	Under	P63001 P01749 P01754	Rac1,Ighv1-61,Ighv1-62-3
ko04064	NF-kappa B signaling pathway	3	0.7850054135866047	1.0	0.7042990654205608	Under	P01749 P01754 Q61805	Ighv1-61,Ighv1-62-3,Lbp
ko04650	Natural killer cell mediated cytotoxicity	3	0.7850054135866047	1.0	0.7042990654205608	Under	P63001 P01749 P01754	Rac1,Ighv1-61,Ighv1-62-3
ko04662	B cell receptor signaling pathway	3	0.7850054135866047	1.0	0.7042990654205608	Under	P63001 P01749 P01754	Rac1,Ighv1-61,Ighv1-62-3
ko04672	Intestinal immune network for IgA production	3	0.7850054135866047	1.0	0.7042990654205608	Under	O70570 P01749 P01754	Pigr,Ighv1-61,Ighv1-62-3
ko05322	Systemic lupus erythematosus	6	0.8308321274970356	1.0	0.8589012992933668	Under	P01749 P01029 Q8CG14 Q8CG16 P98086 P01754	Ighv1-61,C4b,C1sa,C1ra,C1qa,Ighv1-62-3
ko00270	Cysteine and methionine metabolism	1	1.0	1.0	1.1738317757009344	Over	O35490	Bhmt
ko05203	Viral carcinogenesis	2	1.0	1.0	0.7825545171339563	Under	P63001 A2AN08	Rac1,Ubr4
ko05206	MicroRNAs in cancer	1	1.0	1.0	0.9781931464174454	Under	P39876	Timp3
ko05225	Hepatocellular carcinoma	1	1.0	1.0	0.9781931464174454	Under	P60710	Actb
ko05230	Central carbon metabolism in cancer	1	1.0	1.0	0.9781931464174454	Under	P47857	Pfkm
ko00250	Alanine, aspartate and glutamate metabolism	1	1.0	1.0	1.1738317757009344	Over	Q91YI0	Asl
ko00230	Purine metabolism	1	1.0	1.0	0.6521287642782968	Under	Q9CWJ9	Atic
ko00220	Arginine biosynthesis	1	1.0	1.0	1.1738317757009344	Over	Q91YI0	Asl
ko05416	Viral myocarditis	5	1.0	1.0	0.9781931464174455	Under	P63001 P01749 P49817 P01754 P60710	Rac1,Ighv1-61,Cav1,Ighv1-62-3,Actb
ko05414	Dilated cardiomyopathy	5	1.0	1.0	0.8892664967431323	Under	P09542 P01749 O55143 P01754 P60710	Myl3,Ighv1-61,Atp2a2,Ighv1-62-3,Actb
ko05170	Human immunodeficiency virus 1 infection	1	1.0	1.0	0.7336448598130839	Under	P63001	Rac1
ko04152	AMPK signaling pathway	1	1.0	1.0	0.8384512683578104	Under	P47857	Pfkm
ko00330	Arginine and proline metabolism	1	1.0	1.0	0.7336448598130839	Under	Q9DCC4	Pycr3
ko04610	Complement and coagulation cascades	9	1.0	1.0	0.9781931464174455	Under	P33587 P41317 P98064 P01029 Q8CG14 Q8CG16 P98086 Q91WP0 P29788	Proc,Mbl2,Masp1,C4b,C1sa,C1ra,C1qa,Masp2,Vtn
ko04145	Phagosome	8	1.0	1.0	0.9990057665539868	Under	P99024 P63001 P41317 P01749 Q8CG16 P01754 P60710 P68368	Tubb5,Rac1,Mbl2,Ighv1-61,C1ra,Ighv1-62-3,Actb,Tuba4a
ko04144	Endocytosis	2	1.0	1.0	0.7825545171339563	Under	P47754 P49817	Capza2,Cav1
ko04218	Cellular senescence	1	1.0	1.0	0.9781931464174454	Under	P47878	Igfbp3
ko04722	Neurotrophin signaling pathway	1	1.0	1.0	1.1738317757009344	Over	P63001	Rac1
ko04810	Regulation of actin cytoskeleton	3	1.0	1.0	0.800339847068819	Under	P63001 Q8VDD5 P60710	Rac1,Myh9,Actb
ko04060	Cytokine-cytokine receptor interaction	1	1.0	1.0	1.1738317757009344	Over	Q9Z126	Pf4
ko04022	cGMP-PKG signaling pathway	1	1.0	1.0	0.6521287642782968	Under	O55143	Atp2a2
ko04926	Relaxin signaling pathway	1	1.0	1.0	0.8384512683578104	Under	P11087	Col1a1
ko04932	Non-alcoholic fatty liver disease	1	1.0	1.0	0.7336448598130839	Under	P63001	Rac1
ko04514	Cell adhesion molecules	1	1.0	1.0	0.8384512683578104	Under	P15702	Spn
ko00310	Lysine degradation	1	1.0	1.0	0.9781931464174454	Under	Q8CAY6	Acat2
ko04972	Pancreatic secretion	2	1.0	1.0	0.9781931464174454	Under	P63001 O55143	Rac1,Atp2a2
ko04015	Rap1 signaling pathway	2	1.0	1.0	0.8384512683578104	Under	P63001 P60710	Rac1,Actb
ko04014	Ras signaling pathway	1	1.0	1.0	0.7336448598130839	Under	P63001	Rac1
ko04010	MAPK signaling pathway	2	1.0	1.0	0.9781931464174454	Under	P63001 P14602	Rac1,Hspb1
ko03320	PPAR signaling pathway	1	1.0	1.0	0.5869158878504672	Under	P0CG50	Ubc
ko04360	Axon guidance	1	1.0	1.0	0.8384512683578104	Under	P63001	Rac1
ko04512	ECM-receptor interaction	3	1.0	1.0	0.9781931464174454	Under	Q04857 P11087 P29788	Col6a1,Col1a1,Vtn
ko00980	Metabolism of xenobiotics by cytochrome P450	1	1.0	1.0	1.1738317757009344	Over	P33267	Cyp2f2
ko00830	Retinol metabolism	1	1.0	1.0	1.1738317757009344	Over	O88451	Rdh7
ko00630	Glyoxylate and dicarboxylate metabolism	1	1.0	1.0	1.1738317757009344	Over	Q8CAY6	Acat2
ko05142	Chagas disease	1	1.0	1.0	0.7336448598130839	Under	P98086	C1qa
ko00380	Tryptophan metabolism	1	1.0	1.0	0.9781931464174454	Under	Q8CAY6	Acat2
ko04975	Fat digestion and absorption	1	1.0	1.0	0.9781931464174454	Under	Q8CAY6	Acat2
ko05417	Lipid and atherosclerosis	2	1.0	1.0	0.9029475197699497	Under	P63001 Q61805	Rac1,Lbp
